# Supplementary material
Source: PubMed Central journal article supplement (PMC2937813)
Supplement: supp_84_19_9957__1.pdf [file supp_84_19_9957__1.pdf]

# Supplementary Tables and Figures

**Suppl. Table 1.** Comprehensive list of primers used for sequencing

(a) Project Specific primers

| Primer Name       | Primer Sequence                               |
|-------------------|-----------------------------------------------|
| PB2_av_M13_1BF    | TGTA AACGACGGCCAGTAGCRAAAGCAGGTCA             |
| PB2_av_M13_1BF    | TGTA AACGACGGCCAGTAGCRAAAGCAGGTCA             |
| PB2_av_M13_1BF    | TGTA AACGACGGCCAGTAGCRAAAGCAGGTCA             |
| PB2_av_M13_492F   | TGTA AACGACGGCCAGTGAGGTYGTTTTCCCAAATGAAG      |
| PB2_av_M13_526F   | TGTA AACGACGGCCAGTGTTCCTCCCAAATGAAGTDGG       |
| PB2_av_M13_628F   | TGTA AACGACGGCCAGTTTRATGGTDGCATACATGYTRG      |
| PB2_av_M13_1048F  | TGTA AACGACGGCCAGTGAAGARGAAGTGCTYACRGGCAAYCT  |
| PB2_av_M13_1102F  | TGTA AACGACGGCCAGTGGRTATGARGARTTCACAATGG      |
| PB2_av_M13_1507F  | TGTA AACGACGGCCAGTGTGTGTRGTNGTRAGYATTGAYCG    |
| PB2_av_M13_1619F  | TGTA AACGACGGCCAGTGATGTGGGARATYAAAYGGBCC      |
| PB2_av_M13_1678F  | TGTA AACGACGGCCAGTCARTGGATCATYAGRAAYTGG       |
| PB1_av_M13_1F     | TGTA AACGACGGCCAGTAGCRAAAGCAGGCA              |
| PB1_av_M13_1F     | TGTA AACGACGGCCAGTAGCRAAAGCAGGCA              |
| PB1_av_M13_1F     | TGTA AACGACGGCCAGTAGCRAAAGCAGGCA              |
| PB1_av_M13_430F   | TGTA AACGACGGCCAGTAAAYCARCCRGCTGCWACYGC       |
| PB1_av_M13_463F   | TGTA AACGACGGCCAGTATAGARGTYTTCAGATCRAAYGGT    |
| PB1_av_M13_679F   | TGTA AACGACGGCCAGTATAAGAGCAYTGACAYTRAAYACAATG |
| PB1_av_M13_1000F  | TGTA AACGACGGCCAGTACAAGRAAYCARCCHGAATGGTT     |
| PB1_av_M13_1090F  | TGTA AACGACGGCCAGTATGTTTCGARAGYAARAGYATGAAG   |
| PB1_av_M13_1366F  | TGTA AACGACGGCCAGTGCTCTCATAGTGAATGCACC        |
| PB1_av_M13_1486F  | TGTA AACGACGGCCAGTGGRACATTTGARTTCACRAG        |
| PB1_av_M13_1568BF | TGTA AACGACGGCCAGTCTRCCCAGYTTTGGRGTDTC        |
| PA_av_M13_1F      | TGTA AACGACGGCCAGTAGCRAAAGCAGGTACTG           |
| PA_av_M13_1BF     | TGTA AACGACGGCCAGTAGCRAAAGCAGGTACTGAT         |
| PA_av_M13_1BF     | TGTA AACGACGGCCAGTAGCRAAAGCAGGTACTGAT         |
| PA_av_M13_471F    | TGTA AACGACGGCCAGTCATTYACYGGRGARGARATGGC      |
| PA_av_M13_562F    | TGTA AACGACGGCCAGTTGGGATTCCTTTCGTCAATC        |
| PA_av_M13_621F    | TGTA AACGACGGCCAGTARACAATTGAAGAAARATTTG       |
| PA_av_M13_1235F   | TGTA AACGACGGCCAGTGCAAGYTGATYCARAGTG          |
| PA_av_M13_1346F   | TGTA AACGACGGCCAGTATGAGRAGRAAYTAYTTYACAGC     |
| PA_av_M13_1577F   | TGTA AACGACGGCCAGTTRAAYTTYGTRAGYATGGA         |
| PA_av_M13_1739F   | TGTA AACGACGGCCAGTAARATYAARATGAARTGGG         |
| NP_av_M13_1BF     | TGTA AACGACGGCCAGTAGCAAAGCAGGGTA              |
| NP_av_M13_1CF     | TGTA AACGACGGCCAGTAGCAAAGCAGGGTAKATAATC       |
| NP_av_M13_1BF     | TGTA AACGACGGCCAGTAGCAAAGCAGGGTA              |
| NP_av_M13_397F    | TGTA AACGACGGCCAGTAGRMTYTGCGYCAAGC            |
| NP_av_M13_403F    | TGTA AACGACGGCCAGTTGGCGYCARGCRAAYAATGG        |
| NP_av_M13_841F    | TGTA AACGACGGCCAGTCTGAGRGGRTCAGTRGCYCA        |
| NP_av_M13_898F    | TGTA AACGACGGCCAGTGTGCCAGYGGRTAYGA            |
| NP_av_M13_1053F   | TGTA AACGACGGCCAGTGGATGGCATGYCAYTCTGCA        |
| MP_av_M13_1BF     | TGTA AACGACGGCCAGTAGCRAAAGCAGGTAGAT           |
| MP_av_M13_1BF     | TGTA AACGACGGCCAGTAGCRAAAGCAGGTAGAT           |
| MP_av_M13_402F    | TGTA AACGACGGCCAGTAGYTGATGGGYCTCATMTAC        |

|                           |                                           |
|---------------------------|-------------------------------------------|
| MP_av_M13_605F            | TGTA AACGACGGCCAGTGGRTCDAGYGAR CARGCAGC   |
| MP_av_M13_1F              | TGTA AACGACGGCCAGTAGCRAAAGCAGKTAGA        |
| NS_av_M13_1F              | TGTA AACGACGGCCAGTAGCRAAAGCAGGGTG         |
| NS_av_M13_1F              | TGTA AACGACGGCCAGTAGCRAAAGCAGGGTG         |
| NS_av_M13_1F              | TGTA AACGACGGCCAGTAGCRAAAGCAGGGTG         |
| NS_av_M13_541F            | TGTA AACGACGGCCAGTAGGATGTCAAAAATGCAATTTRG |
| NS_av_M13_541F            | TGTA AACGACGGCCAGTAGGATGTCAAAAATGCAATTTRG |
| HA_av_H7_M13_1F           | TGTA AACGACGGCCAGTAGCAAAAGCAGGGGAT        |
| HA_av_H7_M13_1F           | TGTA AACGACGGCCAGTAGCAAAAGCAGGGGAT        |
| HA_av_H7_M13_1BF          | TGTA AACGACGGCCAGTAGCAAAAGCAGGGGATACA     |
| HA_av_H7_M13_467F         | TGTA AACGACGGCCAGTAGATCAGGDTCTTCTCTATGCG  |
| HA_av_H7_M13_517F         | TGTA AACGACGGCCAGTAGACAATGCNGCHTTTYCC     |
| HA_av_H7_M13_630F         | TGTA AACGACGGCCAGTHTATGGRAGTGGRA          |
| HA_av_H7_M13_995F         | TGTA AACGACGGCCAGTYTGGCWACAGGRATGA        |
| HA_av_M13_1135F           | TGTA AACGACGGCCAGTTYGGNGCNATWGC           |
| HA_av_M13_1135F           | TGTA AACGACGGCCAGTTYGGNGCNATWGC           |
| HA_av_H7N1_2_3_M13_1F     | TGTA AACGACGGCCAGTAGCAAAAGCAGGGGAYAC      |
| HA_av_H7N1_2_3_M13_645F   | TGTA AACGACGGCCAGTYAARYTRATAACAGT         |
| HA_av_H7N1_2_3_M13_1120F  | TGTA AACGACGGCCAGTGARAATGGDTGGGARGG       |
| HA_av_H7N1_2_3_M13_1F     | TGTA AACGACGGCCAGTAGCAAAAGCAGGGGAYAC      |
| HA_av_H7N1_2_3_M13_645F   | TGTA AACGACGGCCAGTYAARYTRATAACAGT         |
| HA_av_H7N1_2_3_M13_1120F  | TGTA AACGACGGCCAGTGARAATGGDTGGGARGG       |
| NA_av_N1_4_M13_1BF        | TGTA AACGACGGCCAGTAGCAAAAGCAGGAGWTT       |
| NA_av_N1_4_M13_1BF        | TGTA AACGACGGCCAGTAGCAAAAGCAGGAGWTT       |
| NA_av_N1_4_M13_517F       | TGTA AACGACGGCCAGTYTRATGAGYTYGYCC         |
| NA_av_N1_4_M13_517F       | TGTA AACGACGGCCAGTYTRATGAGYTYGYCC         |
| NA_av_N1_4_5_7_8_M13_926F | TGTA AACGACGGCCAGTAGRGAYAAAYTGG           |
| NA_av_N1_4_5_7_8_M13_926F | TGTA AACGACGGCCAGTAGRGAYAAAYTGG           |
| NA_H7N1_M13_1F            | TGTA AACGACGGCCAGTAGCAAAAGCAGGAG          |
| NA_H7N1_M13_465F          | TGTA AACGACGGCCAGTCARTTCTRTCTTCGG         |
| NA_H7N1_M13_903F          | TGTA AACGACGGCCAGTAAAYTGGCATGGYTCRAATCG   |
| NA_av_N2_7_M13_1F         | TGTA AACGACGGCCAGTAGCAAAAGCAGG            |
| NA_av_N2_7_M13_1F         | TGTA AACGACGGCCAGTAGCAAAAGCAGG            |
| NA_av_N2_M13_580F         | TGTA AACGACGGCCAGTTDGSRTGGTCYAG           |
| NA_av_N2_M13_580F         | TGTA AACGACGGCCAGTTDGSRTGGTCYAG           |
| NA_av_N2_M13_926F         | TGTA AACGACGGCCAGTAGRGAYAAAYTGG           |
| NA_av_N2_M13_973F         | TGTA AACGACGGCCAGTTGTGTGYTCAGGRCTYGTGG    |
| NA_H7N2_M13_1F            | TGTA AACGACGGCCAGTATGAAYCCAAAYCAGAAG      |
| NA_H7N2_M13_442F          | TGTA AACGACGGCCAGTACAATACATGATAGAAYCC     |
| NA_H7N2_M13_891F          | TGTA AACGACGGCCAGTCTCTAATAGGCCYGTATAG     |
| NA_av_N3_M13_1CF          | TGTA AACGACGGCCAGTAGCAAAAGCAGGTGCGARATG   |
| NA_av_N3_M13_1CF          | TGTA AACGACGGCCAGTAGCAAAAGCAGGTGCGARATG   |
| NA_av_N3_M13_409F         | TGTA AACGACGGCCAGTTGGTCYTTTGCHCTHGCNCAAGG |
| NA_av_N3_M13_445F         | TGTA AACGACGGCCAGTACHAARCAAYAGCAATGG      |
| NA_av_N3_M13_1060F        | TGTA AACGACGGCCAGTGGAGTBAARGDTTTTGG       |
| PB2_av_M13_1619F          | TGTA AACGACGGCCAGTGATGTGGGARATYAAAYGGBCC  |
| PB1_av_M13_1F             | TGTA AACGACGGCCAGTAGCRAAAGCAGGCCA         |
| NP_av_M13_1BF             | TGTA AACGACGGCCAGTAGCAAAAGCAGGGTA         |
| NS_av_M13_1F              | TGTA AACGACGGCCAGTAGCRAAAGCAGGGTG         |
| NA_av_N3_M13_1091BF       | TGTA AACGACGGCCAGTGAYGTRTGGYTVGG          |
| NA_H7N3_M13_1F            | TGTA AACGACGGCCAGTAGCAAAAGCAGGTGCGAG      |
| NA_H7N3_M13_461F          | TGTA AACGACGGCCAGTAAAGACAGRACRCCRTATAG    |

|                   |                                                |
|-------------------|------------------------------------------------|
| NA_H7N3_M13_1051F | TGTA AACGACGGCCAGTGGAGTSAARGD TTTGG            |
| PB2_av_M13_662R   | CAGGAAACAGCTATGACCACYARYTCYCTTTTCYARCATGTATGC  |
| PB2_av_M13_707R   | CAGGAAACAGCTATGACCACACTRCTTGTGYCCRCWCWGC       |
| PB2_av_M13_782R   | CAGGAAACAGCTATGACCCHGGDGTGTACATYTYGTCC         |
| PB2_av_M13_1619R  | CAGGAAACAGCTATGACCGVCCRTTRATYTCACACATC         |
| PB2_av_M13_1214R  | CAGGAAACAGCTATGACCTCAGCRATTGAYTGYTCRTCTCTYCCAC |
| PB2_av_M13_1259R  | CAGGAAACAGCTATGACCATCATGCAATCCTCYTGTGARAAYACC  |
| PB2_av_M13_1721R  | CAGGAAACAGCTATGACCAGCATTGAATYTTTHACVGTYTCCC    |
| PB2_av_M13_1820R  | CAGGAAACAGCTATGACCGTYCTCACRAAYCCRCTGTAYTG      |
| PB2_av_M13_2341BR | CAGGAAACAGCTATGACCTAGTAGAAACAAGGTCGTTT         |
| PB2_av_M13_2341BR | CAGGAAACAGCTATGACCTAGTAGAAACAAGGTCGTTT         |
| PB2_av_M13_2341BR | CAGGAAACAGCTATGACCTAGTAGAAACAAGGTCGTTT         |
| PB1_av_M13_609BR  | CAGGAAACAGCTATGACCGTGTGAYCATYTTCTTGGTC         |
| PB1_av_M13_609BR  | CAGGAAACAGCTATGACCGTGTGAYCATYTTCTTGGTC         |
| PB1_av_M13_778R   | CAGGAAACAGCTATGACCRAAHCTCTGATYTGCAATYCC        |
| PB1_av_M13_1113R  | CAGGAAACAGCTATGACCCTTCATGCTYTTTRCTYTCRAACAT    |
| PB1_av_M13_1208R  | CAGGAAACAGCTATGACCAGAGGYCTTATYTTTCDATTTTCTT    |
| PB1_av_M13_1510R  | CAGGAAACAGCTATGACCAAAARCTYGTGAAYTCAAATGYTCC    |
| PB1_av_M13_1667R  | CAGGAAACAGCTATGACCAGAGCCATYTGRCGCHGTTGCTGG     |
| PB1_av_M13_1785R  | CAGGAAACAGCTATGACCCTTYGARC GGGTYTYTCC          |
| PB1_av_M13_2341R  | CAGGAAACAGCTATGACCAGTAGAAACAAGGCATTT           |
| PB1_av_M13_2341R  | CAGGAAACAGCTATGACCAGTAGAAACAAGGCATTT           |
| PB1_av_M13_2341R  | CAGGAAACAGCTATGACCAGTAGAAACAAGGCATTT           |
| PA_av_M13_612R    | CAGGAAACAGCTATGACCCTYTCGGAYTGACGAAAGGAATCCC    |
| PA_av_M13_690R    | CAGGAAACAGCTATGACCTTCGGTGGGAGACTTTGGTC         |
| PA_av_M13_756R    | CAGGAAACAGCTATGACCCCTCAATGCAGCCRTTCGG          |
| PA_av_M13_1125R   | CAGGAAACAGCTATGACCTTYAAYTGGCTGT TTTTYTTCAT     |
| PA_av_M13_1472R   | CAGGAAACAGCTATGACCGTYCTGCATTTGCTTATCATTGG      |
| PA_av_M13_1353R   | CAGGAAACAGCTATGACCCTYCTCATRCTY GCAATGTGYTC     |
| PA_av_M13_1881R   | CAGGAAACAGCTATGACCAYGTYTCHGAYTTGTTTTCAAAG      |
| PA_av_M13_2233BR  | CAGGAAACAGCTATGACCAGTAGAAACAAGGTACTTTTTT       |
| PA_av_M13_2233CR  | CAGGAAACAGCTATGACCAGTAGAAACAAGGTACTTTTTTGG     |
| PA_av_M13_2233BR  | CAGGAAACAGCTATGACCAGTAGAAACAAGGTACTTTTTT       |
| NP_av_M13_532R    | CAGGAAACAGCTATGACCCTTGTCATCAGAGAGCACAT         |
| NP_av_M13_680R    | CAGGAAACAGCTATGACCCRTTYTCDCCYCTCCAGA           |
| NP_av_M13_1053R   | CAGGAAACAGCTATGACCTGCAGARTGRCATGCCATCC         |
| NP_av_M13_1172R   | CAGGAAACAGCTATGACCGARTCYATYGTYTCCATGTTYTC      |
| NP_av_M13_1167R   | CAGGAAACAGCTATGACCATKGYTTCATGTTCTCATT          |
| NP_av_M13_1565CR  | CAGGAAACAGCTATGACCAGTAGAAACAAGGGTATTTT         |
| NP_av_M13_1565CR  | CAGGAAACAGCTATGACCAGTAGAAACAAGGGTATTTT         |
| NP_av_M13_1565BR  | CAGGAAACAGCTATGACCAGTAGAAACAAGGGTATTTT         |
| MP_av_M13_567R    | CAGGAAACAGCTATGACCAGYACCATYCTGTTYTCATGYC       |
| MP_av_M13_674R    | CAGGAAACAGCTATGACCTCATYGCYTGCAACATYTYGYCT      |
| MP_av_M13_1027R   | CAGGAAACAGCTATGACCAGTAGAAACAAGGTAGTTTTT        |
| MP_av_M13_1027R   | CAGGAAACAGCTATGACCAGTAGAAACAAGGTAGTTTTT        |
| MP_av_M13_1027R   | CAGGAAACAGCTATGACCAGTAGAAACAAGGTAGTTTTT        |
| NS_av_M13_890R    | CAGGAAACAGCTATGACCAGTAGAAACAAGGGTGT TTT        |
| NS_av_M13_577R    | CAGGAAACAGCTATGACCGWRTTATCATTCCATTC AARTCC     |
| NS_av_M13_641R    | CAGGAAACAGCTATGACCYTCYCCAAGCRAATCTCTGT A       |
| NS_av_M13_890R    | CAGGAAACAGCTATGACCAGTAGAAACAAGGGTGT TTT        |
| NS_av_M13_890R    | CAGGAAACAGCTATGACCAGTAGAAACAAGGGTGT TTT        |
| HA_av_H7_M13_659R | CAGGAAACAGCTATGACCCTYCCRTADARYTTGGTCTGYTC      |

|                            |                                                    |
|----------------------------|----------------------------------------------------|
| HA_av_H7_M13_714R          | CAGGAAACAGCTATGACCCDGYTGDCATTYACHTGTGG             |
| HA_av_H7_M13_811R          | CAGGAAACAGCTATGACCGRGCTATRAADGCYCCATTGA            |
| HA_av_H7_M13_1166R         | CAGGAAACAGCTATGACCCATTYTGATGYCTGAADCCATACC         |
| HA_av_H7_M13_1178R         | CAGGAAACAGCTATGACCCYTCYCCYTGTCATTYTGATG            |
| HA_av_H7_M13_1221R         | CAGGAAACAGCTATGACCTGATCWATTGCHGAYTGRGTGC           |
| HA_av_H7_M13_1777R         | CAGGAAACAGCTATGACCAGTAGAAACAAGGGTGTMTT             |
| HA_av_M13_1780R            | CAGGAAACAGCTATGACCAGTAGAAACWAGGGTRTTTT             |
| HA_av_M13_1780R            | CAGGAAACAGCTATGACCAGTAGAAACWAGGGTRTTTT             |
| HA_av_H7N1_2_3_M13_809R    | CAGGAAACAGCTATGACCGRGCTATRAADGCYCCATTG             |
| HA_av_H7N1_2_3_M13_1279R   | CAGGAAACAGCTATGACCTGATCWATTGCHGAYTGRGTGC           |
| HA_av_H7N1_2_3_M13_1785R   | CAGGAAACAGCTATGACCAGTAGAAACAAGGGTGTMTT             |
| HA_av_H7N1_2_3_M13_809R    | CAGGAAACAGCTATGACCGRGCTATRAADGCYCCATTG             |
| HA_av_H7N1_2_3_M13_1279R   | CAGGAAACAGCTATGACCTGATCWATTGCHGAYTGRGTGC           |
| HA_av_H7N1_2_3_M13_1785R   | CAGGAAACAGCTATGACCAGTAGAAACAAGGGTGTMTT             |
| NA_av_N1_4_M13_679R        | CAGGAAACAGCTATGACCTTATGCCATTGTATTTTCARTACWGCHACAGC |
| NA_av_N1_4_M13_679R        | CAGGAAACAGCTATGACCTTATGCCATTGTATTTTCARTACWGCHACAGC |
| NA_av_N1_4_M13_1192R       | CAGGAAACAGCTATGACCCATTTGGATCCCAAAYCATYTCAAANCC     |
| NA_av_N1_4_M13_1192R       | CAGGAAACAGCTATGACCCATTTGGATCCCAAAYCATYTCAAANCC     |
| NA_av_N1_4_5_7_8_M13_1460R | CAGGAAACAGCTATGACCAGTAGAAACAAGGAGTTTTTT            |
| NA_av_N1_4_5_7_8_M13_1460R | CAGGAAACAGCTATGACCAGTAGAAACAAGGAGTTTTTT            |
| NA_H7N1_M13_580R           | CAGGAAACAGCTATGACCCATCRTGRCARGCACTTGC              |
| NA_H7N1_M13_1023R          | CAGGAAACAGCTATGACCARCTGCCTGTCCATCATTTGG            |
| NA_H7N1_M13_1460R          | CAGGAAACAGCTATGACCAGTAGAAACAAGGAGTTT               |
| NA_av_N2_7_M13_795R        | CAGGAAACAGCTATGACCCTGATGCACCTCCATCMGTCATYACHAC     |
| NA_av_N2_7_M13_795R        | CAGGAAACAGCTATGACCCTGATGCACCTCCATCMGTCATYACHAC     |
| NA_av_N2_M13_1128R         | CAGGAAACAGCTATGACCATTGTCAAAGGCCANCCYTYACTCC        |
| NA_av_N2_M13_1128R         | CAGGAAACAGCTATGACCATTGTCAAAGGCCANCCYTYACTCC        |
| NA_av_N2_M13_1460R         | CAGGAAACAGCTATGACCAGTAGAAACAAGGAGTTTTTT            |
| NA_av_N2_M13_1460R         | CAGGAAACAGCTATGACCAGTAGAAACAAGGAGTTTTTT            |
| NA_H7N2_M13_572R           | CAGGAAACAGCTATGACCTGCARCCATGCTTTTYCCATCATG         |
| NA_H7N2_M13_1019R          | CAGGAAACAGCTATGACCGGATCCCTGCARTTGCTGC              |
| NA_H7N2_M13_1447R          | CAGGAAACAGCTATGACCAGTAGAAACAAGGAGTTT               |
| NA_av_N3_M13_581R          | CAGGAAACAGCTATGACCCRTCRAARCARCTRCTRCTYACCA         |
| NA_av_N3_M13_631R          | CAGGAAACAGCTATGACCCACTBGCATCATTRTCRTTYCC           |
| NA_av_N3_M13_1165R         | CAGGAAACAGCTATGACCATCCANCCHTCTGHRACCTTTGAT         |
| NA_av_N3_M13_1233R         | CAGGAAACAGCTATGACCTCATTGTTKGAMACHARTGTYTGTG        |
| NA_av_N3_M13_1455R         | CAGGAAACAGCTATGACCAGTAGAAACAAGGTGCTTTTT            |
| PB2_av_M13_2341BR          | CAGGAAACAGCTATGACCTAGTAGAAACAAGGTGCTTT             |
| PB1_av_M13_609BR           | CAGGAAACAGCTATGACCGTGTGAYCATYTTCTTGGTC             |
| NP_av_M13_532R             | CAGGAAACAGCTATGACCCCTTGATCAGAGAGCACAT              |
| NS_av_M13_577R             | CAGGAAACAGCTATGACCGWRTTATCATTCATTCARTCC            |
| NA_av_N3_M13_1455R         | CAGGAAACAGCTATGACCAGTAGAAACAAGGTGCTTTTT            |
| NA_H7N3_M13_628R           | CAGGAAACAGCTATGACCCTYGCATCWTRTCRTTCCC              |
| NA_H7N3_M13_1215R          | CAGGAAACAGCTATGACCGTTKGACACYARTGTYTGTG             |
| NA_H7N3_M13_1455R          | CAGGAAACAGCTATGACCAGTAGAAACAAGGTGCTTTTT            |

## (b) HA segment primers

| Primer Name             | Primer Sequence                           |
|-------------------------|-------------------------------------------|
| HA_av_M13_1F            | TGTA AACGACGGCCAGTAGCAA AAGCAGGGG         |
| HA_av_M13_1F            | TGTA AACGACGGCCAGTAGCAA AAGCAGGGG         |
| HA_av_M13_1F            | TGTA AACGACGGCCAGTAGCAA AAGCAGGGG         |
| HA_av_M13_1135F         | TGTA AACGACGGCCAGTTTYGGNGCNATWGC          |
| HA_av_M13_1135F         | TGTA AACGACGGCCAGTTTYGGNGCNATWGC          |
| HA_av_H1_M13_1F         | TGTA AACGACGGCCAGTAGCAA AAGCAGGGG         |
| HA_av_H1_M13_555F       | TGTA AACGACGGCCAGTTAYCCWAARCTCAGCAAATC    |
| HA_av_H1_M13_582F       | TGTA AACGACGGCCAGTAACAAYAARGRRAARGAAGTVCT |
| HA_av_H1_M13_618F       | TGTA AACGACGGCCAGTGTDCAYCAYCCWCC          |
| HA_av_H1_M13_976F       | TGTA AACGACGGCCAGTTCACYATTGGRGARTGYCC     |
| HA_av_all_M13_1F        | TGTA AACGACGGCCAGTAGCAA AAGCAGGGG         |
| HA_av_H2_M13_1F         | TGTA AACGACGGCCAGTAGCAA AAGCAGGGGT        |
| HA_av_H2_M13_1F         | TGTA AACGACGGCCAGTAGCAA AAGCAGGGGT        |
| HA_av_H2_M13_570F       | TGTA AACGACGGCCAGTGRCTDTAYAACAAYACAA      |
| HA_av_H2_M13_671F       | TGTA AACGACGGCCAGTACMTATGKTCHGTDGG        |
| HA_av_H2_M13_671F       | TGTA AACGACGGCCAGTACMTATGKTCHGTDGG        |
| HA_av_H2_M13_1064F      | TGTA AACGACGGCCAGTGGRTTGTGGRGCAATAGC      |
| HA_av_H2_M13_1067F      | TGTA AACGACGGCCAGTTGTTTGGRGCAATMGC        |
| HA_av_H2_M13_1167F      | TGTA AACGACGGCCAGTCAGCAGACAAAGARTCCACTCA  |
| HA_av_H3_M13_1F         | TGTA AACGACGGCCAGTAGCAA AAGCAGGGGATA      |
| HA_av_H3_M13_1F         | TGTA AACGACGGCCAGTAGCAA AAGCAGGGGATA      |
| HA_av_H3_M13_1F         | TGTA AACGACGGCCAGTAGCAA AAGCAGGGGATA      |
| HA_av_H3_M13_565F       | TGTA AACGACGGCCAGTTGYTGAAAYGTRACTATGCC    |
| HA_av_H3_M13_571F       | TGTA AACGACGGCCAGTTGAAYGTRACTATGCC        |
| HA_av_H3_M13_571F       | TGTA AACGACGGCCAGTTGAAYGTRACTATGCC        |
| HA_av_H3_4_14_M13_1095F | TGTA AACGACGGCCAGTGCWGGNTTYATAGARAATGG    |
| HA_av_H4_M13_1F         | TGTA AACGACGGCCAGTAGCAA AAGCMRGGGAA       |
| HA_av_H4_M13_553F       | TGTA AACGACGGCCAGTTAYCCMCTYCARAAYYTGACAAA |
| HA_av_H4_M13_620F       | TGTA AACGACGGCCAGTGACAMAGARCAAAYC         |
| HA_av_H4_M13_682F       | TGTA AACGACGGCCAGTYAGTCAAACAAGTGTRG       |
| HA_av_H4_M13_1025F      | TGTA AACGACGGCCAGTAACATYCCTGARAARGC       |
| HA_av_H5_M13_1F         | TGTA AACGACGGCCAGTAGCAA AAGCAGGGGT        |
| HA_av_H5_M13_527F       | TGTA AACGACGGCCAGTTGGYTBATCAARAAG         |
| HA_av_H5_M13_551F       | TGTA AACGACGGCCAGTTACCCAACHATAAARAG       |
| HA_av_H5_M13_617F       | TGTA AACGACGGCCAGTCAYCAYCCHAATGATGC       |
| HA_av_H5_M13_935F       | TGTA AACGACGGCCAGTATAAAYTCHAGYATGCC       |
| HA_av_H6_M13_1F         | TGTA AACGACGGCCAGTAGCAA AAGCAGGGGAA       |
| HA_av_H6_M13_507F       | TGTA AACGACGGCCAGTCTNYTRTGGATAATAAA       |
| HA_av_H6_M13_591F       | TGTA AACGACGGCCAGTTATTTTGGGGTGTDCAYC      |
| HA_av_H6_M13_666F       | TGTA AACGACGGCCAGTAGRATGGGRACTGAAAG       |
| HA_av_H6_M13_1050F      | TGTA AACGACGGCCAGTAGAGGAYTBTTYGGRGC       |
| HA_av_H6_M13_1050F      | TGTA AACGACGGCCAGTAGAGGAYTBTTYGGRGC       |
| HA_av_H7_M13_1F         | TGTA AACGACGGCCAGTAGCAA AAGCAGGGGAT       |
| HA_av_H7_M13_1F         | TGTA AACGACGGCCAGTAGCAA AAGCAGGGGAT       |
| HA_av_H7_M13_1BF        | TGTA AACGACGGCCAGTAGCAA AAGCAGGGGATACA    |
| HA_av_H7_M13_467F       | TGTA AACGACGGCCAGTAGATCAGGDTCTCNTTCTATGC  |
| HA_av_H7_M13_517F       | TGTA AACGACGGCCAGTAGCAATGCNGCHTTYCC       |
| HA_av_H7_M13_630F       | TGTA AACGACGGCCAGTHTATGGRAGTGGRA          |
| HA_av_H7_M13_995F       | TGTA AACGACGGCCAGTYTGGCWACAGGRATGA        |

|                     |                                            |
|---------------------|--------------------------------------------|
| HA_av_H8_M13_1F     | TGTA AACGACGGCCAGTAGCAAAGCAGGGGCACAA       |
| HA_av_H8_M13_1F     | TGTA AACGACGGCCAGTAGCAAAGCAGGGGCACAA       |
| HA_av_H8_M13_1F     | TGTA AACGACGGCCAGTAGCAAAGCAGGGGCACAA       |
| HA_av_H8_M13_560F   | TGTA AACGACGGCCAGTTATGTTAAYAATGAAGATGGAGAC |
| HA_av_H8_M13_581F   | TGTA AACGACGGCCAGTGACATCATTTTCTTATGG       |
| HA_av_H8_M13_634F   | TGTA AACGACGGCCAGTRACACTATATAARAATGCAAACAC |
| HA_av_H8_M13_1102F  | TGTA AACGACGGCCAGTGATTGATGGRTGGTATGGATTTC  |
| HA_av_H9_M13_1F     | TGTA AACGACGGCCAGTAGCAAAGCAGGGGAA          |
| HA_av_H9_M13_599F   | TGTA AACGACGGCCAGTGCATAMAYCAYCCACC         |
| HA_av_H9_M13_652F   | TGTA AACGACGGCCAGTGAYACAACAACAAGTGT        |
| HA_av_H9_M13_665F   | TGTA AACGACGGCCAGTGTDRCAACAGARGAT          |
| HA_av_H9_M13_1117F  | TGTA AACGACGGCCAGTTTCAGCATTCAAATGAYCARGG   |
| HA_av_M13_1F        | TGTA AACGACGGCCAGTAGCAAAGCAGGGG            |
| HA_av_H10_M13_485F  | TGTA AACGACGGCCAGTTATGCRGARCTMAARTGG       |
| HA_av_H10_M13_669F  | TGTA AACGACGGCCAGTCTACWTATCARAACARCTTTG    |
| HA_av_H10_M13_719F  | TGTA AACGACGGCCAGTAAYGGHCAAAAGTGGRCG       |
| HA_av_H10_M13_1041F | TGTA AACGACGGCCAGTGGRATGARRAAYGTNCCNG      |
| HA_av_H11_M13_1F    | TGTA AACGACGGCCAGTAGCAAAGCAGGGG            |
| HA_av_H11_M13_540F  | TGTA AACGACGGCCAGTTCAGGRACATAYCCTG         |
| HA_av_H11_M13_576F  | TGTA AACGACGGCCAGTAAYACCAAAGGRAGAG         |
| HA_av_H11_M13_669F  | TGTA AACGACGGCCAGTTATGTAGCAGTGGGTTCAG      |
| HA_av_H11_M13_1063F | TGTA AACGACGGCCAGTTGTTTGGWGCATAGCYGG       |
| HA_av_H12_M13_1BF   | TGTA AACGACGGCCAGTAGCAAAGCAGG              |
| HA_av_H12_M13_1F    | TGTA AACGACGGCCAGTAGCAAAGCAGGGGTCA         |
| HA_av_H12_M13_1F    | TGTA AACGACGGCCAGTAGCAAAGCAGGGGTCA         |
| HA_av_H12_M13_599F  | TGTA AACGACGGCCAGTATTCAAYCCACCAACATC       |
| HA_av_H12_M13_650F  | TGTA AACGACGGCCAGTGATACYCTCTCYTCWGTG       |
| HA_av_H12_M13_680F  | TGTA AACGACGGCCAGTATCAATAGGAGYTTCAAGC      |
| HA_av_H12_M13_1047F | TGTA AACGACGGCCAGTGRCTCTTTGGAGCAATGCAGG    |
| HA_av_H12_M13_1176F | TGTA AACGACGGCCAGTCAATAGACAAYATGCARAACAAAC |
| HA_av_H12_M13_1214F | TGTA AACGACGGCCAGTGAYAAAATGAAYAARCAATTTG   |
| HA_av_H13_M13_1F    | TGTA AACGACGGCCAGTAGCAAAGCAGGGGA           |
| HA_av_H13_M13_579F  | TGTA AACGACGGCCAGTGACYTACAACAAYACHACKGGHAG |
| HA_av_H13_M13_621F  | TGTA AACGACGGCCAGTGGGDATAAYCAYCCWGT        |
| HA_av_H13_M13_1088F | TGTA AACGACGGCCAGTTTGAGVTTTCATAGAAGGWGG    |
| HA_av_H14_M13_1F    | TGTA AACGACGGCCAGTAGCAAAGCAGGGGAA          |
| HA_av_H14_M13_582F  | TGTA AACGACGGCCAGTGGCTCTTATGTCAGGCTC       |
| HA_av_H14_M13_633F  | TGTA AACGACGGCCAGTAATGAGCAAACGGATCTC       |
| HA_av_H14_M13_1117F | TGTA AACGACGGCCAGTGGTGGTATGGATTTCAGGCACCA  |
| PB2_av_M13_1619F    | TGTA AACGACGGCCAGTGATGTGGGARATYAAYGBCC     |
| PB1_av_M13_1F       | TGTA AACGACGGCCAGTAGCRAAAGCAGGCA           |
| NP_av_M13_1BF       | TGTA AACGACGGCCAGTAGCAAAGCAGGGTA           |
| NS_av_M13_1F        | TGTA AACGACGGCCAGTAGCRAAAGCAGGGTG          |
| HA_av_H15_M13_1F    | TGTA AACGACGGCCAGTAGCAAAGCAGGGGA           |
| HA_av_H15_M13_613F  | TGTA AACGACGGCCAGTGATGAGCAAAATAAGCTATATGG  |
| HA_av_H15_M13_682F  | TGTA AACGACGGCCAGTTCGTTTTCCACCAAGTCCAGG    |
| HA_av_H15_M13_1048F | TGTA AACGACGGCCAGTCCAGAGAAAATACRTACTAGG    |
| HA_av_M13_1761R     | CAGGAAACAGCTATGACCAGTAGAAACAAGGGTRTTTT     |
| HA_av_M13_639R      | CAGGAAACAGCTATGACCGGAGGATGRTGYACNCCCA      |
| HA_av_M13_639R      | CAGGAAACAGCTATGACCGGAGGATGRTGYACNCCCA      |
| HA_av_M13_1780R     | CAGGAAACAGCTATGACCAGTAGAAACWAGGGTRTTTT     |
| HA_av_M13_1780R     | CAGGAAACAGCTATGACCAGTAGAAACWAGGGTRTTTT     |

|                     |                                              |
|---------------------|----------------------------------------------|
| HA_av_H1_M13_775R   | CAGGAAACAGCTATGACCCARTAATAGTTCATYCTDCCTGC    |
| HA_av_H1_M13_1195R  | CAGGAAACAGCTATGACCCGATTYTGYGTGCTTTTYTGRTC    |
| HA_av_H1_M13_1263R  | CAGGAAACAGCTATGACCCCACTGCDGTGAATTGWGTRTTC    |
| HA_av_H1_M13_1337R  | CAGGAAACAGCTATGACCAYATCCARRAAHCATCATCRAC     |
| HA_av_H1_M13_1779R  | CAGGAAACAGCTATGACCAGTAGAAACAAGGGTGTTT        |
| HA_av_H2_M13_715R   | CAGGAAACAGCTATGACCCYTKRRTYARTGTTGATGTBCC     |
| HA_av_H2_M13_737R   | CAGGAAACAGCTATGACCTDGGYCKTGTGKCTATTTWCWG     |
| HA_av_H2_M13_765R   | CAGGAAACAGCTATGACCTCCATTCTNCCYCCYTYGCC       |
| HA_av_H2_M13_1186R  | CAGGAAACAGCTATGACCAGTGGATTCTTTRTCKGICYGC     |
| HA_av_H2_M13_1357R  | CAGGAAACAGCTATGACCAGYTCRGCATTRTATGTCC        |
| HA_av_H2_M13_1357R  | CAGGAAACAGCTATGACCAGYTCRGCATTRTATGTCC        |
| HA_av_H2_M13_1773R  | CAGGAAACAGCTATGACCAGTAGAAACAAGGGTGTTT        |
| HA_av_H3_M13_686R   | CAGGAAACAGCTATGACCACYCTYCCYGABGCTGAAC        |
| HA_av_H3_M13_734R   | CAGGAAACAGCTATGACCCCRATRTTHGGRATTAYRGTYTGRCT |
| HA_av_H3_M13_754R   | CAGGAAACAGCTATGACCTGRCCYCTBACCMARGGYC        |
| HA_av_H3_M13_1126R  | CAGGAAACAGCTATGACCCARCCRTCTAYCATYCCYTCC      |
| HA_av_H3_M13_1180R  | CAGGAAACAGCTATGACCAGRTCTGCWGTGTYCCTG         |
| HA_av_H3_M13_1195R  | CAGGAAACAGCTATGACCCGYTGWGTGCTTTTWAGRTCTGC    |
| HA_av_all_M13_1780R | CAGGAAACAGCTATGACCAGTAGAAACWAGGGTRTTTT       |
| HA_av_H4_M13_829R   | CAGGAAACAGCTATGACCCRATTARATTYCCTATKGRTRTG    |
| HA_av_H4_M13_1153R  | CAGGAAACAGCTATGACCCGYCTYCTGTGYCCYTCWGCRTTYTG |
| HA_av_H4_M13_1227R  | CAGGAAACAGCTATGACCTTTGTYYTCTCRATRAGACG       |
| HA_av_H4_M13_1308R  | CAGGAAACAGCTATGACCGTRTCYCAACATABTTYTC        |
| HA_av_H4_M13_1739R  | CAGGAAACAGCTATGACCAGTAGAAACAAGGGTGTTT        |
| HA_av_H5_M13_762R   | CAGGAAACAGCTATGACCTCCATYCTTCCACTTTGYCC       |
| HA_av_H5_M13_1139R  | CAGGAAACAGCTATGACCCCATKCCYTGCCAYCCYCC        |
| HA_av_H5_M13_1185R  | CAGGAAACAGCTATGACCCCACTHCCYTGCTCRTTGC        |
| HA_av_H5_M13_1264R  | CAGGAAACAGCTATGACCCATTTTGTCAATGATYGARTTBAC   |
| HA_av_H5_M13_1802R  | CAGGAAACAGCTATGACCAGTAGAAACWAGGGTGTTT        |
| HA_av_H6_M13_793R   | CAGGAAACAGCTATGACCACATTYAADGTTTCYCHGG        |
| HA_av_H6_M13_1168R  | CAGGAAACAGCTATGACCTCTYTRTCTGTGCATANCC        |
| HA_av_H6_M13_1243R  | CAGGAAACAGCTATGACCTCRAAYTGTGTRTTTCATYTTG     |
| HA_av_H6_M13_1345R  | CAGGAAACAGCTATGACCARTTCAGCATTGTATGTCCA       |
| HA_av_H6_M13_1749R  | CAGGAAACAGCTATGACCAGTAGAAACAAGGGTGTTT        |
| HA_av_H6_M13_1749R  | CAGGAAACAGCTATGACCAGTAGAAACAAGGGTGTTT        |
| HA_av_H7_M13_659R   | CAGGAAACAGCTATGACCCYCCRTADARYTTGGTCTGYTC     |
| HA_av_H7_M13_714R   | CAGGAAACAGCTATGACCCDGYATGDCCATTYACHTGTGG     |
| HA_av_H7_M13_811R   | CAGGAAACAGCTATGACCGRGCTATRAADGCYCCATTGA      |
| HA_av_H7_M13_1166R  | CAGGAAACAGCTATGACCCATTYTGATGYCTGAADCCATACC   |
| HA_av_H7_M13_1178R  | CAGGAAACAGCTATGACCCYTCYCCYTGTCATTYTGATG      |
| HA_av_H7_M13_1221R  | CAGGAAACAGCTATGACCTGATCWATTGCHGAYTGRGTGC     |
| HA_av_H7_M13_1777R  | CAGGAAACAGCTATGACCAGTAGAAACAAGGGTGTTT        |
| HA_av_H8_M13_712R   | CAGGAAACAGCTATGACCACCAATATTKGGTTGAAAGYTTCC   |
| HA_av_H8_M13_740R   | CAGGAAACAGCTATGACCCCTGYTGTCTCTTACTAATGG      |
| HA_av_H8_M13_761R   | CAGGAAACAGCTATGACCCCCARTAGTAATCCATYCTYCC     |
| HA_av_H8_M13_1203R  | CAGGAAACAGCTATGACCTTATTGGTKATCTTATCGATGGC    |
| HA_av_H8_M13_1249R  | CAGGAAACAGCTATGACCCACAACYCAAAYTCCCTGTTC      |
| HA_av_H8_M13_1348R  | CAGGAAACAGCTATGACCAAGGAGCTCTGCATTGTARGCC     |
| HA_av_H8_M13_1744R  | CAGGAAACAGCTATGACCAGTAGAAACAAGGGTGTTT        |
| HA_av_H9_M13_815R   | CAGGAAACAGCTATGACCGCDATTAGATTYCCATTRGAYCT    |

|                       |                                              |
|-----------------------|----------------------------------------------|
| HA_av_H9_M13_1238R    | CAGGAAACAGCTATGACCTCATAYTGYYTTGTTTCATYTTTRTC |
| HA_av_H9_M13_1307R    | CAGGAAACAGCTATGACCTGRTCATCRATCTTRTTRTTGATC   |
| HA_av_H9_M13_1400R    | CAGGAAACAGCTATGACCAGATTRTTYACATTYGCATCATG    |
| HA_av_H9_M13_1742R    | CAGGAAACAGCTATGACCAGTAGAAACAAGGGTGTTT        |
| HA_av_H10_15_M13_760R | CAGGAAACAGCTATGACCCARTGRAARTCDATYCKYCC       |
| HA_av_H10_M13_1230R   | CAGGAAACAGCTATGACCTCRAACTCHGTGTTBGTCTTCTC    |
| HA_av_H10_M13_1181R   | CAGGAAACAGCTATGACCTTTGRTCWATAGCYGCTGAGTAC    |
| HA_av_H10_M13_1309R   | CAGGAAACAGCTATGACCGTCKGTTATWGAATCYTTRGTCC    |
| HA_av_all_M13_1780R   | CAGGAAACAGCTATGACCAGTAGAAACWAGGGTRTTTT       |
| HA_av_H11_M13_814R    | CAGGAAACAGCTATGACCCATTGDAYTCRAATGTTATTG      |
| HA_av_H11_M13_1210R   | CAGGAAACAGCTATGACCTTRGANGTTATCTGGTCTAYTGC    |
| HA_av_H11_M13_1282R   | CAGGAAACAGCTATGACCTCYWCWATTTCACTGAATTCRTG    |
| HA_av_H11_M13_1330R   | CAGGAAACAGCTATGACCARTRCRAYMACAGAATCATC       |
| HA_av_H11_M13_1760R   | CAGGAAACAGCTATGACCAGTAGAAACAAGGGTGTTT        |
| HA_av_H12_M13_758R    | CAGGAAACAGCTATGACCCCCARTARTATAATCCATTCTCCC   |
| HA_av_H12_M13_791R    | CAGGAAACAGCTATGACCGTATYTTBACWGTGTTGBCWGG     |
| HA_av_H12_M13_837R    | CAGGAAACAGCTATGACCGTKATTAARTGACCATATTCAGG    |
| HA_av_H12_M13_1161R   | CAGGAAACAGCTATGACCTCTCTGTCTGCAGCYATGCC       |
| HA_av_H12_M13_1292R   | CAGGAAACAGCTATGACCTGGAATTRATCRTGTTTATYCTGC   |
| HA_av_H12_M13_1343R   | CAGGAAACAGCTATGACCCAAGCARTTCWGCATTGTAYGC     |
| HA_av_H12_M13_1737R   | CAGGAAACAGCTATGACCAGTAGAAACAAGGGTGTTT        |
| HA_av_H12_M13_1737R   | CAGGAAACAGCTATGACCAGTAGAAACAAGGGTGTTT        |
| HA_av_H12_M13_1737R   | CAGGAAACAGCTATGACCAGTAGAAACAAGGGTGTTT        |
| HA_av_H13_M13_783R    | CAGGAAACAGCTATGACCCARTAAATYTTTCATCCARCTC     |
| HA_av_H13_M13_1195R   | CAGGAAACAGCTATGACCGTGTYGAYTCTTTRTCTGCAGC     |
| HA_av_H13_M13_1265R   | CAGGAAACAGCTATGACCGARTCATARTYCCRTTCATTTTDTC  |
| HA_av_H13_M13_1770R   | CAGGAAACAGCTATGACCAGTAGAAACAAGGGTRTTT        |
| HA_av_H14_M13_749R    | CAGGAAACAGCTATGACCGCTCTGATTCCTTACYCTCGG      |
| HA_av_H14_M13_1222R   | CAGGAAACAGCTATGACCAATCTGTTTCAGCTTGCCATTTATC  |
| HA_av_H14_M13_1315R   | CAGGAAACAGCTATGACCTCCTCAACGTACTIONTCTCAAGG   |
| HA_av_H14_M13_1747R   | CAGGAAACAGCTATGACCAGTAGAAACAAGGGTGTTTT       |
| PB2_av_M13_2341BR     | CAGGAAACAGCTATGACCTAGTAGAAACAAGGTCGTTT       |
| PB1_av_M13_609BR      | CAGGAAACAGCTATGACCGTGTGAYCATYTTCTTGGTC       |
| NP_av_M13_532R        | CAGGAAACAGCTATGACCCCTTGCAATCAGAGAGCACAT      |
| NS_av_M13_577R        | CAGGAAACAGCTATGACCGWRTTATCATTCCATTCAARTCC    |
| HA_av_H15_M13_791R    | CAGGAAACAGCTATGACCTTGAAGGTAAGTACTGTATCC      |
| HA_av_H15_M13_1197R   | CAGGAAACAGCTATGACCAGCCTGAGTACTCTTGTAGTC      |
| HA_av_H15_M13_1277R   | CAGGAAACAGCTATGACCAACTCATTGTCTATGAGTTCAAAC   |
| HA_av_H15_M13_1763R   | CAGGAAACAGCTATGACCAGTAGAAACAAGGGTGTTT        |
| HA_av_H16_M13_783R    | CAGGAAACAGCTATGACCATBARGTGCCAATADAKTTTCATCC  |
| HA_av_H16_M13_1227R   | CAGGAAACAGCTATGACCATATTRTTWATYTTTGTGTTATYTC  |
| HA_av_H16_M13_1302R   | CAGGAAACAGCTATGACCAKCATGTTGATYCTCTTTTCYA     |
| HA_av_H16_M13_1761R   | CAGGAAACAGCTATGACCAGTAGAAACAAGGGTRTTT        |
| HA_av_H16_M13_1F      | TGTAAAACGACGGCCAGTAGCAAAAGCAGGGGATA          |
| HA_av_H16_M13_591F    | TGTAAAACGACGGCCAGTCAGGCAGAGATGTTTYTAG        |
| HA_av_H16_M13_620F    | TGTAAAACGACGGCCAGTATTCACCAYCCDGAYACAG        |
| HA_av_H16_M13_1085F   | TGTAAAACGACGGCCAGTGGMTTYATAGAAGGAGGRTGG      |



(c) PB2, PB1, PA, NP, MP, NS, NA segment primers

| Primer Name               | Primer Sequence                               |
|---------------------------|-----------------------------------------------|
| PB2_av_M13_1BF            | TGTA AACGACGGCCAGTAGCRAAAGCAGGTCA             |
| PB2_av_M13_1BF            | TGTA AACGACGGCCAGTAGCRAAAGCAGGTCA             |
| PB2_av_M13_1BF            | TGTA AACGACGGCCAGTAGCRAAAGCAGGTCA             |
| PB2_av_M13_492F           | TGTA AACGACGGCCAGTGAGGTYGTTTTCCCAAATGAAG      |
| PB2_av_M13_526F           | TGTA AACGACGGCCAGTGTTCCTCCCAAATGAAGTDGG       |
| PB2_av_M13_628F           | TGTA AACGACGGCCAGTTTRATGGTDGCATACATGYTRG      |
| PB2_av_M13_1048F          | TGTA AACGACGGCCAGTGAAGARGAAGTGCTYACRGGCAAAYCT |
| PB2_av_M13_1102F          | TGTA AACGACGGCCAGTGGRTATGARGARTTCACAATGG      |
| PB2_av_M13_1507F          | TGTA AACGACGGCCAGTGTGRTNGTRAGYATTGAYCG        |
| PB2_av_M13_1619F          | TGTA AACGACGGCCAGTGATGTGGGARATYAAYGGBCC       |
| PB2_av_M13_1678F          | TGTA AACGACGGCCAGTCARTGGATCATYAGRAAYTGG       |
| PB1_av_M13_1F             | TGTA AACGACGGCCAGTAGCRAAAGCAGGCA              |
| PB1_av_M13_1F             | TGTA AACGACGGCCAGTAGCRAAAGCAGGCA              |
| PB1_av_M13_1F             | TGTA AACGACGGCCAGTAGCRAAAGCAGGCA              |
| PB1_av_M13_430F           | TGTA AACGACGGCCAGTAAYCARCCRGCTGCWACYGC        |
| PB1_av_M13_463F           | TGTA AACGACGGCCAGTATAGARGTYTTCAGATCRAAYGGT    |
| PB1_av_M13_679F           | TGTA AACGACGGCCAGTATAAGAGCAYTGACAYTRAAYACAATG |
| PB1_av_M13_1000F          | TGTA AACGACGGCCAGTACAAGRAAYCARCCHGAATGGTT     |
| PB1_av_M13_1090F          | TGTA AACGACGGCCAGTATGTTTCGARAGYAARAGYATGAAG   |
| PB1_av_M13_1366F          | TGTA AACGACGGCCAGTGCTCTCATAGTGAATGCACC        |
| PB1_av_M13_1486F          | TGTA AACGACGGCCAGTGGACATTTGARTTCACRAG         |
| PB1_av_M13_1568BF         | TGTA AACGACGGCCAGTCTRCCCAGYTTTGGRTDTC         |
| PA_av_M13_1F              | TGTA AACGACGGCCAGTAGCRAAAGCAGGTACTG           |
| PA_av_M13_1BF             | TGTA AACGACGGCCAGTAGCRAAAGCAGGTACTGAT         |
| PA_av_M13_1BF             | TGTA AACGACGGCCAGTAGCRAAAGCAGGTACTGAT         |
| PA_av_M13_471F            | TGTA AACGACGGCCAGTCATTYACYGGRGARGARATGGC      |
| PA_av_M13_562F            | TGTA AACGACGGCCAGTTGGGATTCCTTTTCGTCAATC       |
| PA_av_M13_621F            | TGTA AACGACGGCCAGTARACAATTGAAGAAARATTTG       |
| PA_av_M13_1235F           | TGTA AACGACGGCCAGTGCAAGYTGATYCARAGTG          |
| PA_av_M13_1346F           | TGTA AACGACGGCCAGTATGAGRAGRAAYTAYTTYACAGC     |
| PA_av_M13_1577F           | TGTA AACGACGGCCAGTTRAAYTTYGTRAGYATGGA         |
| PA_av_M13_1739F           | TGTA AACGACGGCCAGTAARATYAARATGAARTGGG         |
| NP_av_M13_1BF             | TGTA AACGACGGCCAGTAGCAAAGCAGGGTA              |
| NP_av_M13_1CF             | TGTA AACGACGGCCAGTAGCAAAGCAGGGTAKATAATC       |
| NP_av_M13_1BF             | TGTA AACGACGGCCAGTAGCAAAGCAGGGTA              |
| NP_av_M13_403F            | TGTA AACGACGGCCAGTTGGCGYCARGCRAAYAATGG        |
| NP_av_M13_841F            | TGTA AACGACGGCCAGTCTGAGRGGRTCAGTRGCYCA        |
| NP_av_M13_898F            | TGTA AACGACGGCCAGTGTGCCAGYGGRTAYGA            |
| NP_av_M13_1053F           | TGTA AACGACGGCCAGTGGATGGCATGYCAYTCTGCA        |
| MP_av_M13_1BF             | TGTA AACGACGGCCAGTAGCRAAAGCAGGTAGAT           |
| MP_av_M13_1BF             | TGTA AACGACGGCCAGTAGCRAAAGCAGGTAGAT           |
| MP_av_M13_402F            | TGTA AACGACGGCCAGTAGYTYATGGGYCTCATMTAC        |
| MP_av_M13_605F            | TGTA AACGACGGCCAGTGGRTCDAGYGARCARGCAGC        |
| MP_av_M13_1F              | TGTA AACGACGGCCAGTAGCRAAAGCAGKTAGA            |
| NS_av_M13_1F              | TGTA AACGACGGCCAGTAGCRAAAGCAGGGTG             |
| NS_av_M13_1F              | TGTA AACGACGGCCAGTAGCRAAAGCAGGGTG             |
| NS_av_M13_1F              | TGTA AACGACGGCCAGTAGCRAAAGCAGGGTG             |
| NS_av_M13_541F            | TGTA AACGACGGCCAGTAGGATGTCAAATGCAATTRG        |
| NS_av_M13_541F            | TGTA AACGACGGCCAGTAGGATGTCAAATGCAATTRG        |
| NA_av_N1_4_5_7_8_M13_926F | TGTA AACGACGGCCAGTAGRGAYAYTGG                 |

|                           |                                               |
|---------------------------|-----------------------------------------------|
| NA_av_N1_4_5_7_8_M13_926F | TGTA AACGACGGCCAGTAGRGAYAA YTG                |
| NA_av_N1_4_M13_1BF        | TGTA AACGACGGCCAGTAGCAAAAGCAGGAGWTT           |
| NA_av_N1_4_M13_1BF        | TGTA AACGACGGCCAGTAGCAAAAGCAGGAGWTT           |
| NA_av_N1_4_M13_517F       | TGTA AACGACGGCCAGTYTRATGAGYTYGCC              |
| NA_av_N1_4_M13_517F       | TGTA AACGACGGCCAGTYTRATGAGYTYGCC              |
| NA_av_N2_7_M13_1F         | TGTA AACGACGGCCAGTAGCAAAAGCAGG                |
| NA_av_N2_7_M13_1F         | TGTA AACGACGGCCAGTAGCAAAAGCAGG                |
| NA_av_N2_M13_580F         | TGTA AACGACGGCCAGTTDGSRTGGTCYAG               |
| NA_av_N2_M13_580F         | TGTA AACGACGGCCAGTTDGSRTGGTCYAG               |
| NA_av_N2_M13_926F         | TGTA AACGACGGCCAGTAGRGAYAA YTG                |
| NA_av_N2_M13_973F         | TGTA AACGACGGCCAGTTGTGTGYTCAGGRCTYGTGG        |
| NA_av_N3_M13_1CF          | TGTA AACGACGGCCAGTAGCAAAAGCAGGTGCGARATG       |
| NA_av_N3_M13_1CF          | TGTA AACGACGGCCAGTAGCAAAAGCAGGTGCGARATG       |
| NA_av_N3_M13_409F         | TGTA AACGACGGCCAGTTGGTCYTTTGCHCTHGCNCAAGG     |
| NA_av_N3_M13_445F         | TGTA AACGACGGCCAGTACHAARCA YAGCAATGG          |
| NA_av_N3_M13_1060F        | TGTA AACGACGGCCAGTGGAGTBAARGD TTTGG           |
| NA_av_N3_M13_1091BF       | TGTA AACGACGGCCAGTGAYGTRTGGYTVGG              |
| NA_av_N5_8_M13_1F         | TGTA AACGACGGCCAGTAGCAAAAGCAGGAGT             |
| NA_av_N5_8_M13_1F         | TGTA AACGACGGCCAGTAGCAAAAGCAGGAGT             |
| NA_av_N5_8_M13_728F       | TGTA AACGACGGCCAGTTGYTAYTGGGTRATGAC           |
| NA_av_N5_8_M13_735F       | TGTA AACGACGGCCAGTTATTGGGTRATGACDGAYGG        |
| NA_av_N6_9_M13_1BF        | TGTA AACGACGGCCAGTAGCAAAAGCAGGGTSAA           |
| NA_av_N6_9_M13_1BF        | TGTA AACGACGGCCAGTAGCAAAAGCAGGGTSAA           |
| NA_av_N6_M13_461F         | TGTA AACGACGGCCAGTCAAATGGRACNATACAYG          |
| NA_av_N6_9_M13_462F       | TGTA AACGACGGCCAGTCAAATGGRACHATACAYGAYAG      |
| NA_av_N6_M13_495F         | TGTA AACGACGGCCAGTNGCHYTNATAAGYTTG            |
| NA_av_N6_9_M13_850F       | TGTA AACGACGGCCAGTCAYATHGAAGARTGYTCNTGC       |
| NA_av_N6_9_M13_919F       | TGTA AACGACGGCCAGTGGNKCRATAGRCCRGTTRAT        |
| NA_av_N7_M13_608F         | TGTA AACGACGGCCAGTGGRAATAATGAYAA YGCHACAGC    |
| NA_av_N7_M13_608F         | TGTA AACGACGGCCAGTGGRAATAATGAYAA YGCHACAGC    |
| NA_av_N9_M13_455F         | TGTA AACGACGGCCAGTTCAAAYGGAACAATACAYGAYAG     |
| NA_av_N9_M13_455F         | TGTA AACGACGGCCAGTTCAAAYGGAACAATACAYGAYAG     |
| NA_av_N1_4_M13_902F       | TGTA AACGACGGCCAGTRGAYAA YTGGRBGG             |
| NA_av_N3_M13_449BF        | TGTA AACGACGGCCAGTCAYAGCAATGGRAC              |
| NA_av_N5_8_M13_979F       | TGTA AACGACGGCCAGTCCCSASHGAYACYCCAMG          |
| PB2_av_M13_1082F          | TGTA AACGACGGCCAGTGARGAGTTCA CAATGGTTGG       |
| PB1_av_M13_1F             | TGTA AACGACGGCCAGTAGCRAAAGCAGGCA              |
| NP_av_M13_532F            | TGTA AACGACGGCCAGTATGTGCTCTCTGATGCAAGG        |
| PB2_av_M13_1619F          | TGTA AACGACGGCCAGTGATGTGGGARATYAA YGGBCC      |
| PB1_av_M13_1F             | TGTA AACGACGGCCAGTAGCRAAAGCAGGCA              |
| NP_av_M13_1BF             | TGTA AACGACGGCCAGTAGCAAAAGCAGGGTA             |
| NS_av_M13_1F              | TGTA AACGACGGCCAGTAGCRAAAGCAGGGTG             |
| PB2_av_M13_662R           | CAGGAAACAGCTATGACCACYARYTCYCTTTCYARCATGTATGC  |
| PB2_av_M13_707R           | CAGGAAACAGCTATGACCACACTRCTTGTGCCRCWGC         |
| PB2_av_M13_782R           | CAGGAAACAGCTATGACCCCHGGDGTGTACATYTYTCC        |
| PB2_av_M13_1619R          | CAGGAAACAGCTATGACCGVCCRTRATYTYTCCACATC        |
| PB2_av_M13_1214R          | CAGGAAACAGCTATGACCTCAGCRATTGAYTYTCRTCTCTYCCAC |
| PB2_av_M13_1259R          | CAGGAAACAGCTATGACCATCATGCAATCCTCYTGTGARAAYACC |
| PB2_av_M13_1721R          | CAGGAAACAGCTATGACCGACCATGAATYTTTHACVGTYTCCC   |
| PB2_av_M13_1820R          | CAGGAAACAGCTATGACCGTYCTCACRAAYCCRCTGTAYTG     |
| PB2_av_M13_2341BR         | CAGGAAACAGCTATGACCTAGTAGAAACAAGGTCGTTT        |
| PB2_av_M13_2341BR         | CAGGAAACAGCTATGACCTAGTAGAAACAAGGTCGTTT        |

|                            |                                                    |
|----------------------------|----------------------------------------------------|
| PB2_av_M13_2341BR          | CAGGAAACAGCTATGACCTAGTAGAAACAAGGTCGTTT             |
| PB1_av_M13_609BR           | CAGGAAACAGCTATGACCGTGTGAYCATYTTCTTGGTC             |
| PB1_av_M13_609BR           | CAGGAAACAGCTATGACCGTGTGAYCATYTTCTTGGTC             |
| PB1_av_M13_778R            | CAGGAAACAGCTATGACCCRAAHCCTCTGATYTGTCATYCC          |
| PB1_av_M13_1113R           | CAGGAAACAGCTATGACCCCTTCATGCTYTRCTYTCRAACAT         |
| PB1_av_M13_1208R           | CAGGAAACAGCTATGACCAGAGGYCTTATYTTYTCDATTTTCTT       |
| PB1_av_M13_1510R           | CAGGAAACAGCTATGACCAAARCTYGTGAAYTCAAATGTYCC         |
| PB1_av_M13_1667R           | CAGGAAACAGCTATGACCAGAGCCATYTRGCHGTTGCTGG           |
| PB1_av_M13_1785R           | CAGGAAACAGCTATGACCGCYTTYGARCGGGTYTGYTCCC           |
| PB1_av_M13_2341R           | CAGGAAACAGCTATGACCAGTAGAAACAAGGCATTT               |
| PB1_av_M13_2341R           | CAGGAAACAGCTATGACCAGTAGAAACAAGGCATTT               |
| PB1_av_M13_2341R           | CAGGAAACAGCTATGACCAGTAGAAACAAGGCATTT               |
| PA_av_M13_612R             | CAGGAAACAGCTATGACCCYTCGAYTGACGAAAGGAATCCC          |
| PA_av_M13_690R             | CAGGAAACAGCTATGACCTTCGGTGGGAGACTTTGGTC             |
| PA_av_M13_756R             | CAGGAAACAGCTATGACCCCTCAATGCAGCCRTTCGG              |
| PA_av_M13_1125R            | CAGGAAACAGCTATGACCTTYAAYTGCTTGTFTTYTTCAT           |
| PA_av_M13_1472R            | CAGGAAACAGCTATGACCGTYCTGCATTTGCTTATCATTGG          |
| PA_av_M13_1353R            | CAGGAAACAGCTATGACCCYCTCATRCTYGAATGTGYTC            |
| PA_av_M13_1881R            | CAGGAAACAGCTATGACCCAYGTYTCHGAYTTGTFTTCAAAG         |
| PA_av_M13_2233BR           | CAGGAAACAGCTATGACCAGTAGAAACAAGGTACTTTTT            |
| PA_av_M13_2233CR           | CAGGAAACAGCTATGACCAGTAGAAACAAGGTACTTTTTTGG         |
| PA_av_M13_2233BR           | CAGGAAACAGCTATGACCAGTAGAAACAAGGTACTTTTT            |
| NP_av_M13_532R             | CAGGAAACAGCTATGACCCCTTGCAATCAGAGAGCACAT            |
| NP_av_M13_680R             | CAGGAAACAGCTATGACCCRTTYTCDCCYCTCCAGA               |
| NP_av_M13_1053R            | CAGGAAACAGCTATGACCTGCAGARTGRCATGCCATCC             |
| NP_av_M13_1167R            | CAGGAAACAGCTATGACCATKGYTYTCCATGTTCTCATT            |
| NP_av_M13_1565CR           | CAGGAAACAGCTATGACCAGTAGAAACAAGGGTATTTT             |
| NP_av_M13_1565CR           | CAGGAAACAGCTATGACCAGTAGAAACAAGGGTATTTT             |
| NP_av_M13_1565BR           | CAGGAAACAGCTATGACCAGTAGAAACAAGGGTATTTT             |
| MP_av_M13_567R             | CAGGAAACAGCTATGACCAGYACCATYCTGTTYTCATGYC           |
| MP_av_M13_674R             | CAGGAAACAGCTATGACCTCATYGCYTGACCATYTYGYCT           |
| MP_av_M13_1027R            | CAGGAAACAGCTATGACCAGTAGAAACAAGGTAGTTTTT            |
| MP_av_M13_1027R            | CAGGAAACAGCTATGACCAGTAGAAACAAGGTAGTTTTT            |
| MP_av_M13_1027R            | CAGGAAACAGCTATGACCAGTAGAAACAAGGTAGTTTTT            |
| NS_av_M13_890R             | CAGGAAACAGCTATGACCAGTAGAAACAAGGGTGTFTT             |
| NS_av_M13_577R             | CAGGAAACAGCTATGACCGWRTTATCATTCATTCAARTCC           |
| NS_av_M13_641R             | CAGGAAACAGCTATGACCYCYCCAAGCRAATCTCTGTA             |
| NS_av_M13_890R             | CAGGAAACAGCTATGACCAGTAGAAACAAGGGTGTFTT             |
| NS_av_M13_890R             | CAGGAAACAGCTATGACCAGTAGAAACAAGGGTGTFTT             |
| NA_av_N1_4_5_7_8_M13_1460R | CAGGAAACAGCTATGACCAGTAGAAACAAGGAGTTTTTT            |
| NA_av_N1_4_5_7_8_M13_1460R | CAGGAAACAGCTATGACCAGTAGAAACAAGGAGTTTTTT            |
| NA_av_N1_4_M13_679R        | CAGGAAACAGCTATGACCTTATGCCATTGTATTTTCARTACWGCHACAGC |
| NA_av_N1_4_M13_679R        | CAGGAAACAGCTATGACCTTATGCCATTGTATTTTCARTACWGCHACAGC |
| NA_av_N1_4_M13_1192R       | CAGGAAACAGCTATGACCCATTTGGATCCCAAAYCATYTCAAANCC     |
| NA_av_N1_4_M13_1192R       | CAGGAAACAGCTATGACCCATTTGGATCCCAAAYCATYTCAAANCC     |
| NA_av_N2_7_M13_795R        | CAGGAAACAGCTATGACCCCTGATGCACCTCCATCMGTTCATYACHAC   |
| NA_av_N2_7_M13_795R        | CAGGAAACAGCTATGACCCCTGATGCACCTCCATCMGTTCATYACHAC   |
| NA_av_N2_M13_1128R         | CAGGAAACAGCTATGACCCATTGTCAAAGGCCANCCYTTYACTCC      |
| NA_av_N2_M13_1128R         | CAGGAAACAGCTATGACCCATTGTCAAAGGCCANCCYTTYACTCC      |
| NA_av_N2_M13_1460R         | CAGGAAACAGCTATGACCAGTAGAAACAAGGAGTTTTTT            |
| NA_av_N2_M13_1460R         | CAGGAAACAGCTATGACCAGTAGAAACAAGGAGTTTTTT            |
| NA_av_N3_M13_581R          | CAGGAAACAGCTATGACCCCTCRAARCARCTRCRCTYGACCA         |

|                      |                                                        |
|----------------------|--------------------------------------------------------|
| NA_av_N3_M13_631R    | CAGGAAACAGCTATGACCCACTBGCATCATTRTCRTTYCC               |
| NA_av_N3_M13_1165R   | CAGGAAACAGCTATGACCATCCANCCHTCTGHRACCTTTGAT             |
| NA_av_N3_M13_1233R   | CAGGAAACAGCTATGACCTCATTGTTKGAMACHARTGTYTGTG            |
| NA_av_N3_M13_1455R   | CAGGAAACAGCTATGACCAGTAGAAACAAGGTGCTTTTT                |
| NA_av_N3_M13_1455R   | CAGGAAACAGCTATGACCAGTAGAAACAAGGTGCTTTTT                |
| NA_av_N5_8_M13_881R  | CAGGAAACAGCTATGACCTTGGGGTAGCATGAGCAYTCTTCWATRTG        |
| NA_av_N5_8_M13_881R  | CAGGAAACAGCTATGACCTTGGGGTAGCATGAGCAYTCTTCWATRTG        |
| NA_av_N5_8_M13_1362R | CAGGAAACAGCTATGACCTGGAGCTRCTDGARGTCCA                  |
| NA_av_N5_8_M13_1259R | CAGGAAACAGCTATGACCGTGAARGMNCRCRTRAHCCYGACCA            |
| NA_av_N6_9_M13_619R  | CAGGAAACAGCTATGACCCCYGAYAYRCAKATWGACATYCT              |
| NA_av_N6_9_M13_619R  | CAGGAAACAGCTATGACCCCYGAYAYRCAKATWGACATYCT              |
| NA_av_N6_M13_1160R   | CAGGAAACAGCTATGACCCATYTCRTANCCNGAYCTDGARKCTKTGCT       |
| NA_av_N6_9_M13_1136R | CAGGAAACAGCTATGACCCTKTGCTWATBGTYCTHCCNARCC             |
| NA_av_N6_M13_1160R   | CAGGAAACAGCTATGACCCATYTCRTANCCNGAYCTDGARKCTKTGCT       |
| NA_av_N6_9_M13_1461R | CAGGAAACAGCTATGACCAGTAGAWACAAGGGTSTTTTT                |
| NA_av_N6_9_M13_1461R | CAGGAAACAGCTATGACCAGTAGAWACAAGGGTSTTTTT                |
| NA_av_N7_M13_1083R   | CAGGAAACAGCTATGACCAAMCCGAAAYCCYTTBACYC                 |
| NA_av_N7_M13_1083R   | CAGGAAACAGCTATGACCAAMCCGAAAYCCYTTBACYC                 |
| NA_av_N9_M13_1161R   | CAGGAAACAGCTATGACCCGCACYTTYAGCATYTCRTAYCC              |
| NA_av_N9_M13_1161R   | CAGGAAACAGCTATGACCCGCACYTTYAGCATYTCRTAYCC              |
| NA_av_N1_4_M13_1460R | CAGGAAACAGCTATGACCAGTAGAAACAAGGAGTTTTT                 |
| NA_av_N3_M13_1233R   | CAGGAAACAGCTATGACCTCATTGTTKGAMACHARTGTYTGTG            |
| NA_av_N5_8_M13_1460R | CAGGAAACAGCTATGACCAGTAGAAACAAGGAGTTTTT                 |
| PB2_av_M13_2341R     | CAGGAAACAGCTATGACCATATGGTCTCGTATTAGTAGAAACAAGGTCGTTT   |
| PB1_av_M13_1123BR    | CAGGAAACAGCTATGACCGTGTGCGDAGYTTTCATDCTC                |
| NP_av_M13_1565R      | CAGGAAACAGCTATGACCATATCGTCTCGTATTAGTAGAAACAAGGGTATTTTT |
| PB2_av_M13_2341BR    | CAGGAAACAGCTATGACCTAGTAGAAACAAGGTCGTTT                 |
| PB1_av_M13_609BR     | CAGGAAACAGCTATGACCGTGTGAYCATYTTCTTGGTC                 |
| NP_av_M13_532R       | CAGGAAACAGCTATGACCCCTTGCATCAGAGAGCACAT                 |
| NS_av_M13_577R       | CAGGAAACAGCTATGACCGWRTTATCATTCATTCARTCC                |

**Suppl. Table 2.** Details of subtype H7 sequences used in this study.

| #1 | Protein <sup>2</sup> | Subtype | country   | Region <sup>3</sup> | Year | Animal              | GenBank  | Virus name                                      |
|----|----------------------|---------|-----------|---------------------|------|---------------------|----------|-------------------------------------------------|
| 1  | HA                   | H7N4    | Australia | A                   | 1997 | emu                 | CY022709 | A/emu/New South Wales/775/97(H7N4)              |
| 2  | HA                   | H7N7    | Australia | A                   | 1976 | duck                |          | A/duck/Victoria/76(H7N7)                        |
| 3  | HA                   | H7N6    | Australia | A                   | 2007 | duck                |          | A/duck/Victoria/512/2007(H7N6)                  |
| 4  | HA                   | H7N3    | Australia | A                   | 1994 | chicken             | CY022685 | A/chicken/Queensland/1994(H7N3)                 |
| 5  | HA                   | H7N4    | Australia | A                   | 1997 | chicken             | CY022693 | A/chicken/New South Wales/2/1997(H7N4)          |
| 6  | HA                   | H7N7    | Australia | A                   | 1985 | starling            | CY024778 | A/starling/Victoria/1985(H7N7)                  |
| 7  | HA                   | H7N4    | Australia | A                   | 1997 | chicken             | CY022701 | A/chicken/New South Wales/327/1997(H7N4)        |
| 8  | HA                   | H7N7    | Australia | A                   | 1976 | chicken             | CY024786 | A/chicken/Victoria/1976(H7N7)                   |
| 9  | HA                   | H7N7    | Australia | A                   | 1985 | chicken             | CY025069 | A/chicken/Victoria/1/1985(H7N7)                 |
| 10 | HA                   | H7N3    | Australia | A                   | 1992 | chicken             | CY025077 | A/chicken/Victoria/224/1992(H7N3)               |
| 11 | HA                   | H7N2    | Australia | A                   | 2007 | duck                | CY033161 | A/duck/Tasmania/277/2007(H7N2)                  |
| 12 | HA                   | H7N3    | Bolivia   | SA                  | 2001 | cinnamon teal       | DQ525411 | A/cinnamon teal/Bolivia/4537/2001(H7N3)         |
| 13 | HA                   | H7N3    | Canada    | NA                  | 2004 | chicken             | AY648287 | A/GSC_chicken_B/British Columbia/04(H7N3)       |
| 14 | HA                   | H7N3    | Canada    | NA                  | 1985 | mallard duck        | CY014587 | A/mallard duck/Alberta/435/1985(H7N3)           |
| 15 | HA                   | H7N3    | Canada    | NA                  | 2007 | American black duck | EU500852 | A/American black duck/NB/2538/2007(H7N3)        |
| 16 | HA                   | H7      | Canada    | NA                  | 2007 | duck                | EF576989 | A/duck/AB/AFLBs8734c16/2007(H7)                 |
| 17 | HA                   | H7N3    | Canada    | NA                  | 2004 | chicken             | EF470587 | A/chicken/British Columbia/CN-7/2004(H7N3)      |
| 18 | HA                   | H7N3    | Canada    | NA                  | 1977 | mallard duck        | CY005976 | A/mallard duck/ALB/279/1977(H7N3)               |
| 19 | HA                   | H7N3    | Canada    | NA                  | 1977 | blue winged teal    | CY005974 | A/blue-winged teal/ALB/295/1977(H7N3)           |
| 20 | HA                   | H7N3    | Canada    | NA                  | 1985 | green winged teal   | CY005978 | A/green-winged teal/ALB/228/1985(H7N3)          |
| 21 | HA                   | H7N3    | Canada    | NA                  | 2004 | chicken             | AY646078 | A/chicken/British Columbia/GSC_human_B/04(H7N3) |
| 22 | HA                   | H7N3    | Canada    | NA                  | 2001 | mallard             | DQ017513 | A/mallard/Alberta/24/01(H7N3)                   |
| 23 | HA                   | H7N3    | Canada    | NA                  | 2004 | chicken             | AY611524 | A/chicken/British Columbia/04(H7N3)             |
| 24 | HA                   | H7N3    | Canada    | NA                  | 2004 | chicken             | AY650270 | A/GSC_chicken/British Columbia/04(H7N3)         |
| 25 | HA                   | H7N1    | Canada    | NA                  | 2001 | mallard             | CY005983 | A/mallard/Alberta/34/2001(H7N1)                 |
| 26 | HA                   | H7N5    | Canada    | NA                  | 1977 | mallard duck        | CY005973 | A/mallard duck/ALB/224/1977(H7N5)               |
| 27 | HA                   | H7N3    | Canada    | NA                  | 2001 | mallard             | DQ017504 | A/mallard/Alberta/24/01(H7N3)                   |
| 28 | HA                   | H7N3    | Canada    | NA                  | 2007 | Canada goose        | EU500844 | A/Canada goose/BC/3752/2007(H7N3)               |
| 29 | HA                   | H7N3    | Canada    | NA                  | 2007 | chicken             | EU500860 | A/chicken/SK/HR-00011/2007(H7N3)                |
| 30 | HA                   | H7N3    | Chile     | SA                  | 2002 | chicken             | CY015027 | A/chicken/Chile/184240-4322/2002(H7N3)          |
| 31 | HA                   | H7N3    | Chile     | SA                  | 2002 | chicken             | AY303633 | A/chicken/Chile/4968/02(H7N3)                   |
| 32 | HA                   | H7N3    | Chile     | SA                  | 2002 | chicken             | AY303631 | A/chicken/Chile/4322/02(H7N3)                   |
| 33 | HA                   | H7N3    | Chile     | SA                  | 2002 | turkey              | AY303635 | A/turkey/Chile/4418/02(H7N3)                    |
| 34 | HA                   | H7N3    | Chile     | SA                  | 2002 | chicken             | AY303630 | A/chicken/Chile/176822/02(H7N3)                 |
| 35 | HA                   | H7N3    | Chile     | SA                  | 2002 | chicken             | AY303632 | A/chicken/Chile/4957/02(H7N3)                   |
| 36 | HA                   | H7N3    | Chile     | SA                  | 2002 | chicken             | AY303634 | A/chicken/Chile/4977/02(H7N3)                   |
| 37 | HA                   | H7N7    | China     | E                   | 2003 | duck                | EU158108 | A/duck/Jiangxi/1742/03(H7N7)                    |
| 38 | HA                   | H7N2    | China     | E                   | 2002 | chicken             | AY724257 | A/chicken/Hebei/1/2002(H7N2)                    |
| 39 | HA                   | H7N1    | China     | E                   | 1992 | duck                | CY014612 | A/duck/Nanchang/1904/1992(H7N1)                 |
| 40 | HA                   | H7N1    | Egypt     | E                   | 1945 | fowl                | AF202237 | A/fowl/Egypt/45(H7N1)                           |
| 41 | HA                   | H7N1    | Germany   | E                   | 1934 | chicken             | M24457   | A/chicken/Rostock/8/1934(H7N1)                  |
| 42 | HA                   | H7N7    | Germany   | E                   | 1987 | chicken             | U20469   | A/chicken/Jena/1816/87(H7N7)                    |
| 43 | HA                   | H7N7    | Germany   | E                   | 2003 | chicken             | AJ620350 | A/chicken/Germany/R28/03(H7N7)                  |
| 44 | HA                   | H7N7    | Germany   | E                   | 1979 | goose               | L43913   | A/goose/Leipzig/137/8/1979(H7N7)                |
| 45 | HA                   | H7N7    | Germany   | E                   | 1979 | goose               | L43915   | A/goose/Leipzig/192/7/1979(H7N7)                |
| 46 | HA                   | H7N1    | Germany   | E                   | 1934 | ts1                 | M24458   | A/ts1/1/A/FPV/Rostock/1934(H7N1)                |
| 47 | HA                   | H7N7    | Germany   | E                   | 1979 | goose               | L43914   | A/goose/Leipzig/187-7/1979(H7N7)                |
| 48 | HA                   | H7N7    | Germany   | E                   | 1979 | chicken             | U20459   | A/chicken/Leipzig/79(H7N7)                      |
| 49 | HA                   | H7N7    | Germany   | E                   | 1986 | duck                | U20465   | A/duck/Heinersdorf/S495/6/86(H7N7)              |
| 50 | HA                   | H7N1    | Hong Kong | E                   | 1972 | duck                | DQ003216 | A/duck/Hongkong/301/72(H7N1)                    |
| 51 | HA                   | H7N2    | Hong Kong | E                   | 1978 | duck                | CY006029 | A/duck/Hong Kong/293/1978(H7N2)                 |
| 52 | HA                   | H7N2    | Hong Kong | E                   | 1978 | duck                | U20461   | A/duck/Hong Kong/293/1978(H7N2)                 |
| 53 | HA                   | H7N2    | Hong Kong | E                   | 1978 | duck                | AB302789 | A/duck/Hong Kong/301/1978(H7N2)                 |
| 54 | HA                   | H7N7    | Ireland   | E                   | 1995 | turkey              | AF028021 | A/turkey/Ireland/PV74/1995(H7N7)                |
| 55 | HA                   | H7N2    | Israel    | E                   | 1979 | turkey              | AF202235 | A/turkey/Israel/Ramon/79(H7N2)                  |
| 56 | HA                   | H7N3    | Italy     | E                   | 2003 | turkey              | CY021493 | A/turkey/Italy/2987/2003(H7N3)                  |
| 57 | HA                   | H7N1    | Italy     | E                   | 2000 | quail               | CY022669 | A/quail/Italy/396/2000(H7N1)                    |
| 58 | HA                   | H7N1    | Italy     | E                   | 1999 | chicken             | CY022677 | A/chicken/Italy/1082/99(H7N1)                   |
| 59 | HA                   | H7N1    | Italy     | E                   | 2001 | turkey              | CY021421 | A/turkey/Italy/1351/2001(H7N1)                  |
| 60 | HA                   | H7N3    | Italy     | E                   | 2003 | turkey              | CY021485 | A/turkey/Italy/4608/2003(H7N3)                  |
| 61 | HA                   | H7N1    | Italy     | E                   | 2000 | pekin duck          | CY024898 | A/pekin duck/Italy/1848/2000(H7N1)              |
| 62 | HA                   | H7N3    | Italy     | E                   | 2003 | turkey              | CY020589 | A/turkey/Italy/251/2003(H7N3)                   |
| 63 | HA                   | H7N3    | Italy     | E                   | 2001 | mallard             | AY586410 | A/mallard/Italy/43/2001(H7N3)                   |
| 64 | HA                   | H7N1    | Italy     | E                   | 1999 | turkey              | CY025189 | A/turkey/Italy/1265/1999(H7N1)                  |
| 65 | HA                   | H7N1    | Italy     | E                   | 1999 | turkey              | AJ493470 | A/turkey/Italy/4602/99(H7N1)                    |
| 66 | HA                   | H7N1    | Italy     | E                   | 1999 | turkey              | AJ489520 | A/turkey/Italy/12598/99(H7N1)                   |
| 67 | HA                   | H7N3    | Italy     | E                   | 2002 | guinea fowl         | EU158110 | A/Guinea fowl/Italy/266184/02(H7N3)             |

| # <sup>1</sup> | Protein <sup>2</sup> | Subtype | country     | Region <sup>3</sup> | Year | Animal      | GenBank  | Virus name                              |
|----------------|----------------------|---------|-------------|---------------------|------|-------------|----------|-----------------------------------------|
| 68             | HA                   | H7N3    | Italy       | E                   | 2001 | mallard     | EU158109 | A/mallard/Italy/199/01(H7N3)            |
| 69             | HA                   | H7N1    | Italy       | E                   | 2000 | chicken     | CY015014 | A/chicken/Italy/1285/2000(H7N1)         |
| 70             | HA                   | H7N1    | Italy       | E                   | 2000 | ostrich     | DQ991304 | A/ostrich/Italy/2332/00(H7N1)           |
| 71             | HA                   | H7N1    | Italy       | E                   | 1999 | turkey      | CY025157 | A/turkey/Italy/3489/1999(H7N1)          |
| 72             | HA                   | H7N1    | Italy       | E                   | 1999 | turkey      | CY025173 | A/turkey/Italy/2715/1999(H7N1)          |
| 73             | HA                   | H7N3    | Italy       | E                   | 2007 | turkey      | EU391536 | A/turkey/Italy/5425/2007(H7N3)          |
| 74             | HA                   | H7N2    | Italy       | E                   | 1993 | gull        | AF202248 | A/gull/Italy/692-2/93(H7N2)             |
| 75             | HA                   | H7N1    | Italy       | E                   | 1999 | turkey      | CY006037 | A/turkey/Italy/4169/1999(H7N1)          |
| 76             | HA                   | H7N3    | Italy       | E                   | 2003 | turkey      | CY021357 | A/turkey/Italy/3620/2003(H7N3)          |
| 77             | HA                   | H7N1    | Italy       | E                   | 2000 | guinea fowl | CY022661 | A/guinea fowl/Italy/155/2000(H7N1)      |
| 78             | HA                   | H7N1    | Italy       | E                   | 1999 | turkey      | CY024874 | A/turkey/Italy/4295/1999(H7N1)          |
| 79             | HA                   | H7N1    | Italy       | E                   | 1999 | turkey      | CY024858 | A/turkey/Italy/4708/1999(H7N1)          |
| 80             | HA                   | H7N3    | Italy       | E                   | 2002 | turkey      | CY028660 | A/turkey/Italy/9742/2002(H7N3)          |
| 81             | HA                   | H7N3    | Italy       | E                   | 2004 | turkey      | CY028676 | A/turkey/Italy/3829/2004(H7N3)          |
| 82             | HA                   | H7N3    | Italy       | E                   | 2002 | turkey      | CY020605 | A/turkey/Italy/8912/2002(H7N3)          |
| 83             | HA                   | H7N3    | Italy       | E                   | 2002 | turkey      | CY024738 | A/turkey/Italy/8000/2002(H7N3)          |
| 84             | HA                   | H7N2    | Italy       | E                   | 2003 | duck        | CY031028 | A/duck/Italy/4609/2003(H7N2)            |
| 85             | HA                   | H7N2    | Italy       | E                   | 1991 | psittacine  | AF202242 | A/psittacine/Italy/1/91(H7N2)           |
| 86             | HA                   | H7N3    | Italy       | E                   | 2004 | turkey      | CY021501 | A/turkey/Italy/3337/2004(H7N3)          |
| 87             | HA                   | H7N1    | Italy       | E                   | 2001 | chicken     | CY021549 | A/chicken/Italy/322/2001(H7N1)          |
| 88             | HA                   | H7N1    | Italy       | E                   | 1999 | turkey      | CY021405 | A/turkey/Italy/4580/1999(H7N1)          |
| 89             | HA                   | H7N3    | Italy       | E                   | 2003 | turkey      | CY021365 | A/turkey/Italy/1010/2003(H7N3)          |
| 90             | HA                   | H7N1    | Italy       | E                   | 1999 | turkey      | CY021413 | A/turkey/Italy/3675/1999(H7N1)          |
| 91             | HA                   | H7N1    | Italy       | E                   | 1999 | turkey      | CY024866 | A/turkey/Italy/4482/1999(H7N1)          |
| 92             | HA                   | H7N3    | Italy       | E                   | 2004 | turkey      | CY020581 | A/turkey/Italy/4479/2004(H7N3)          |
| 93             | HA                   | H7N1    | Italy       | E                   | 1999 | turkey      | CY024754 | A/turkey/Italy/977/1999(H7N1)           |
| 94             | HA                   | H7N3    | Italy       | E                   | 2004 | turkey      | CY029913 | A/turkey/Italy/4130/2004(H7N3)          |
| 95             | HA                   | H7N1    | Italy       | E                   | 1999 | turkey      | CY025165 | A/turkey/Italy/3560/1999(H7N1)          |
| 96             | HA                   | H7N3    | Italy       | E                   | 2003 | turkey      | CY028668 | A/turkey/Italy/2685/2003(H7N3)          |
| 97             | HA                   | H7N1    | Italy       | E                   | 1999 | turkey      | AJ493466 | A/turkey/Italy/3889/99(H7N1)            |
| 98             | HA                   | H7N1    | Italy       | E                   | 1999 | turkey      | AJ493467 | A/turkey/Italy/4073/99(H7N1)            |
| 99             | HA                   | H7N1    | Italy       | E                   | 1999 | turkey      | AJ493468 | A/turkey/Italy/4169/1999(H7N1)          |
| 100            | HA                   | H7N1    | Italy       | E                   | 1999 | chicken     | AJ493469 | A/chicken/Italy/4575/99(H7N1)           |
| 101            | HA                   | H7N1    | Italy       | E                   | 1999 | chicken     | AJ584647 | A/Chicken/Italy/1067/99(H7N1)           |
| 102            | HA                   | H7N1    | Italy       | E                   | 2002 | mallard     | EU158105 | A/mallard/Italy/250/02(H7N1)            |
| 103            | HA                   | H7N7    | Italy       | E                   | 2005 | mallard     | EU158104 | A/mallard/Italy/299/05(H7N7)            |
| 104            | HA                   | H7N1    | Italy       | E                   | 1999 | chicken     | AJ491720 | A/chicken/Italy/13474/99(H7N1)          |
| 105            | HA                   | H7N1    | Italy       | E                   | 1999 | chicken     | AJ493214 | A/chicken/Italy/13489/99(H7N1)          |
| 106            | HA                   | H7N1    | Italy       | E                   | 1999 | turkey      | AJ493471 | A/turkey/Italy/4603/1999(H7N1)          |
| 107            | HA                   | H7N1    | Italy       | E                   | 1999 | chicken     | AJ580353 | A/chicken/Italy/445/99(H7N1)            |
| 108            | HA                   | H7N3    | Italy       | E                   | 2002 | turkey      | AJ627491 | A/turkey/Italy/214845/2002(H7N3)        |
| 109            | HA                   | H7N1    | Italy       | E                   | 2000 | chicken     | CY024762 | A/chicken/Italy/2335/2000(H7N1)         |
| 110            | HA                   | H7N3    | Italy       | E                   | 2004 | turkey      | CY020597 | A/turkey/Italy/3807/2004(H7N3)          |
| 111            | HA                   | H7N3    | Italy       | E                   | 2004 | quail       | CY020613 | A/quail/Italy/3347/2004(H7N3)           |
| 112            | HA                   | H7N1    | Italy       | E                   | 2000 | duck        | CY021557 | A/duck/Italy/551/2000(H7N1)             |
| 113            | HA                   | H7N1    | Italy       | E                   | 2000 | turkey      | CY021541 | A/turkey/Italy/4426/2000(H7N1)          |
| 114            | HA                   | H7N1    | Italy       | E                   | 2000 | turkey      | CY021533 | A/turkey/Italy/2984/2000(H7N1)          |
| 115            | HA                   | H7N2    | Italy       | E                   | 2003 | quail       | CY021509 | A/quail/Italy/4610/2003(H7N2)           |
| 116            | HA                   | H7N3    | Italy       | E                   | 2003 | turkey      | CY022613 | A/turkey/Italy/2043/2003(H7N3)          |
| 117            | HA                   | H7N1    | Italy       | E                   | 1999 | turkey      | CY025133 | A/turkey/Italy/4294/1999(H7N1)          |
| 118            | HA                   | H7N1    | Italy       | E                   | 1999 | quail       | CY025117 | A/quail/Italy/4992/1999(H7N1)           |
| 119            | HA                   | H7N1    | Italy       | E                   | 1999 | turkey      | CY025181 | A/turkey/Italy/2732/1999(H7N1)          |
| 120            | HA                   | H7N1    | Italy       | E                   | 1999 | turkey      | CY025149 | A/turkey/Italy/4301/1999(H7N1)          |
| 121            | HA                   | H7N3    | Italy       | E                   | 2002 | turkey      | CY031611 | A/turkey/Italy/9739/2002(H7N3)          |
| 122            | HA                   | H7N1    | Italy       | E                   | 1999 | turkey      | CY024882 | A/turkey/Italy/3185/1999(H7N1)          |
| 123            | HA                   | H7N3    | Italy       | E                   | 2003 | chicken     | CY034750 | A/chicken/Italy/682/2003(H7N3)          |
| 124            | HA                   | H7N8    | Japan       | E                   | 1999 | swan        | AB269872 | A/swan/Shimane/42/1999(H7N8)            |
| 125            | HA                   | H7N1    | Japan       | E                   | 2003 | duck        | AB269694 | A/duck/Hokkaido/143/2003(H7N1)          |
| 126            | HA                   | H7N9    | Mongolia    | E                   | 2008 | duck        | AB481212 | A/duck/Mongolia/119/2008(H7N9)          |
| 127            | HA                   | H7N6    | Mongolia    | E                   | 2007 | duck        | AB450448 | A/duck/Mongolia/720/2007(H7N6)          |
| 128            | HA                   | H7N1    | Mongolia    | E                   | 2001 | duck        | AB268557 | A/duck/Mongolia/47/2001(H7N1)           |
| 129            | HA                   | H7N1    | Mongolia    | E                   | 2002 | duck        | AB473543 | A/duck/Mongolia/867/2002(H7N1)          |
| 130            | HA                   | H7N7    | Netherlands | E                   | 2003 | chicken     | AB438941 | A/chicken/Netherlands/2586/2003(H7N7)   |
| 131            | HA                   | H7N7    | Netherlands | E                   | 1927 | fowl        | Z12617   | A/fowl/Dutch/27(H7N7)                   |
| 132            | HA                   | H7N7    | Netherlands | E                   | 2003 | chicken     | EF015551 | A/chicken/Netherlands/03010132/03(H7N7) |
| 133            | HA                   | H7N1    | Netherlands | E                   | 1994 | parakeet    | AF202251 | A/parakeet/Netherlands/267497/94(H7N1)  |
| 134            | HA                   | H7N8    | Netherlands | E                   | 2006 | mallard     | CY041410 | A/mallard/Netherlands/33/2006(H7N8)     |
| 135            | HA                   | H7N3    | Netherlands | E                   | 2000 | mallard     | CY014718 | A/mallard/Netherlands/12/2000(H7N3)     |
| 136            | HA                   | H7N7    | Netherlands | E                   | 2003 | chicken     | AY338458 | A/chicken/Netherlands/1/03(H7N7)        |
| 137            | HA                   | H7N3    | Netherlands | E                   | 2000 | mallard     | AY338460 | A/mallard/Netherlands/12/2000(H7N3)     |
| 138            | HA                   | H7N7    | New Zealand | NZ                  | 2005 | duck        |          | A/duck/New Zealand/2005(H7N7)           |

| # <sup>1</sup> | Protein <sup>2</sup> | Subtype | country      | Region <sup>3</sup> | Year | Animal            | GenBank  | Virus name                                         |
|----------------|----------------------|---------|--------------|---------------------|------|-------------------|----------|----------------------------------------------------|
| 139            | HA                   | H7N3    | Pakistan     | E                   | 1995 | chicken           | CY035831 | A/chicken/Pakistan/34668/1995(H7N3)                |
| 140            | HA                   | H7N3    | Pakistan     | E                   | 1995 | chicken           | AF202230 | A/chicken/Pakistan/CR2/95(H7N3)                    |
| 141            | HA                   | H7N3    | Pakistan     | E                   | 2002 | chicken           | CY035823 | A/chicken/Rawalpindi/NARC68/2002(H7N3)             |
| 142            | HA                   | H7N3    | Pakistan     | E                   | 2002 | chicken           | CY035839 | A/chicken/Rawalpindi/NARC72/2002(H7N3)             |
| 143            | HA                   | H7N3    | Pakistan     | E                   | 1995 | chicken           | CY015033 | A/chicken/Pakistan/34669/1995(H7N3)                |
| 144            | HA                   | H7N3    | Pakistan     | E                   | 1998 | chicken           | CY037754 | A/chicken/Pakistan/c1998/1998(H7N3)                |
| 145            | HA                   | H7N3    | Pakistan     | E                   | 1995 | chicken           | AF202226 | A/chicken/Pakistan/447/95(H7N3)                    |
| 146            | HA                   | H7N1    | Singapore    | E                   | 1995 | common iora       | AF202228 | A/common iora /Singapore/F89/95(H7N1)              |
| 147            | HA                   | H7N1    | Singapore    | E                   | 1994 | fairy bluebird    | AF202229 | A/fairy bluebird/Singapore/F92/94(H7N1)            |
| 148            | HA                   | H7N1    | South Africa | E                   | 1991 | ostrich           | AF202244 | A/ostrich/South Africa/1069/91(H7N1)               |
| 149            | HA                   | H7N7    | South Africa | E                   | 1996 | ostrich           | AF202253 | A/ostrich/South Africa/M320/96(H7N7)               |
| 150            | HA                   | H7N7    | Sweden       | E                   | 2002 | mallard           | AY999977 | A/mallard/Sweden/56/02(H7N7)                       |
| 151            | HA                   | H7N7    | Sweden       | E                   | 2002 | mallard           | AY999978 | A/mallard/Sweden/82/02(H7N7)                       |
| 152            | HA                   | H7N7    | Sweden       | E                   | 2002 | mallard           | AY999980 | A/mallard/Sweden/87/02(H7N7)                       |
| 153            | HA                   | H7N7    | Sweden       | E                   | 2002 | mallard           | AY999989 | A/mallard/Sweden/105/02(H7N7)                      |
| 154            | HA                   | H7N7    | Sweden       | E                   | 2002 | mallard           | AY999991 | A/mallard/Sweden/107/02(H7N7)                      |
| 155            | HA                   | H7N9    | Sweden       | E                   | 2002 | mallard           | AY999981 | A/mallard/Sweden/91/02(H7N9)                       |
| 156            | HA                   | H7N7    | Sweden       | E                   | 2002 | mallard           | AY999982 | A/mallard/Sweden/92/02(H7N7)                       |
| 157            | HA                   | H7N7    | Sweden       | E                   | 2002 | mallard           | AY999988 | A/mallard/Sweden/104/02(H7N7)                      |
| 158            | HA                   | H7N7    | Sweden       | E                   | 2002 | mallard           | AY999983 | A/mallard/Sweden/93/02(H7N7)                       |
| 159            | HA                   | H7N7    | Sweden       | E                   | 2002 | mallard           | AY999986 | A/mallard/Sweden/102/02(H7N7)                      |
| 160            | HA                   | H7N7    | Sweden       | E                   | 2002 | mallard           | AY999990 | A/mallard/Sweden/106/02(H7N7)                      |
| 161            | HA                   | H7N7    | Sweden       | E                   | 2002 | mallard           | AY999979 | A/mallard/Sweden/85/02(H7N7)                       |
| 162            | HA                   | H7N7    | Sweden       | E                   | 2002 | mallard           | AY999984 | A/mallard/Sweden/94/02(H7N7)                       |
| 163            | HA                   | H7N7    | Sweden       | E                   | 2002 | mallard           | AY999985 | A/mallard/Sweden/100/02(H7N7)                      |
| 164            | HA                   | H7N7    | Sweden       | E                   | 2002 | mallard           | AY999987 | A/mallard/Sweden/103/02(H7N7)                      |
| 165            | HA                   | H7N7    | Taiwan       | E                   | 1993 | duck              | AB297923 | A/duck/Taiwan/33/1993(H7N7)                        |
| 166            | HA                   | H7N7    | Taiwan       | E                   | 1993 | duck              | AB297925 | A/duck/Taiwan/Ya103/1993(H7N7)                     |
| 167            | HA                   | H7N7    | Taiwan       | E                   | 1999 | duck              | AB269695 | A/duck/Taiwan/4201/99(H7N7)                        |
| 168            | HA                   | H7N1    | UK           | E                   | 1973 | parrot            | AF202252 | A/parrot/Northern Ireland/VF-73-67/73(H7N1)        |
| 169            | HA                   | H7N1    | UK           | E                   | 1979 | African starling  | AF202232 | A/African starling/England-Q/983/1979(H7N1)        |
| 170            | HA                   | H7N3    | UK           | E                   | 1979 | turkey            | AF202245 | A/turkey/England/192-328/79(H7N3)                  |
| 171            | HA                   | H7N7    | UK           | E                   | 1998 | turkey            | AF202246 | A/turkey/Northern Ireland/VF-1545 C5/98(H7N7)      |
| 172            | HA                   | H7N3    | UK           | E                   | 2006 | chicken           | EF467826 | A/chicken/England/4054/2006(H7N3)                  |
| 173            | HA                   | H7N7    | UK           | E                   | 2008 | chicken           | FJ476173 | A/chicken/England/1158-11406/2008(H7N7)            |
| 174            | HA                   | H7N2    | UK           | E                   | 2007 | chicken           | EF675618 | A/chicken/Wales/1306/2007(H7N2)                    |
| 175            | HA                   | H7N3    | UK           | E                   | 2006 | chicken           | EF467825 | A/chicken/England/4266/2006(H7N3)                  |
| 176            | HA                   | H7N3    | UK           | E                   | 1963 | turkey            | CY015065 | A/turkey/England/1963(H7N3)                        |
| 177            | HA                   | H7N7    | UK           | E                   | 1989 | non psittacine    | AF202240 | A/non-psittacine/England-Q/1985/89(H7N7)           |
| 178            | HA                   | H7N7    | UK           | E                   | 1977 | turkey            | AF202247 | A/turkey/England/647/77(H7N7)                      |
| 179            | HA                   | H7N1    | UK           | E                   | 1994 | conure            | AF202249 | A/conure/England/766/94(H7N1)                      |
| 180            | HA                   | H7N7    | UK           | E                   | 1934 | fowl              | L37794   | A/fowl/Weybridge(H7N7)                             |
| 181            | HA                   | H7N3    | UK           | E                   | 1963 | turkey            | U20462   | A/turkey/England/1963(H7N3)                        |
| 182            | HA                   | H7N1    | UK           | E                   | 1979 | African starling  | AF149295 | A/African starling/England-Q/983/1979(H7N1)        |
| 183            | HA                   | H7N1    | UK           | E                   | 1994 | conure            | AF202241 | A/conure/England/1234/94(H7N1)                     |
| 184            | HA                   | H7N7    | UK           | E                   | 1980 | macaw             | AF202250 | A/macaw/England/626/80(H7N7)                       |
| 185            | HA                   | H7N1    | UK           | E                   | 1994 | parrot            | AF202243 | A/parrot/England/1174/94(H7N1)                     |
| 186            | HA                   | H7N3    | UK           | E                   | 1963 | turkey            | AF202238 | A/turkey/England/1963(H7N3)                        |
| 187            | HA                   | H7N1    | UK           | E                   | 1982 | chicken           | AF202236 | A/chicken/England/71/82(H7N1)                      |
| 188            | HA                   | H7N3    | USA          | NA                  | 2007 | ruddy turnstone   | CY036775 | A/ruddy turnstone/Delaware Bay/108/2007(H7N3)      |
| 189            | HA                   | H7N3    | USA          | NA                  | 2007 | ruddy turnstone   | CY036783 | A/ruddy turnstone/Delaware Bay/121/2007(H7N3)      |
| 190            | HA                   | H7N2    | USA          | NA                  | 2005 | chicken           | CY031228 | A/chicken/New York/23164-6/2005(H7N2)              |
| 191            | HA                   | H7N2    | USA          | NA                  | 2005 | chicken           | CY035946 | A/chicken/New York/11646-2/2005(H7N2)              |
| 192            | HA                   | H7N2    | USA          | NA                  | 2005 | chicken           | CY031244 | A/chicken/New York/23165-7/2005(H7N2)              |
| 193            | HA                   | H7N3    | USA          | NA                  | 2006 | laughing gull     | CY037079 | A/laughing gull/Delaware Bay/6/2006(H7N3)          |
| 194            | HA                   | H7N3    | USA          | NA                  | 2007 | northern shoveler | CY039580 | A/northern shoveler/California/HKWF1026/2007(H7N3) |
| 195            | HA                   | H7N2    | USA          | NA                  | 1996 | chicken           | CY035580 | A/chicken/New Jersey/Sg-00295/1996(H7N2)           |
| 196            | HA                   | H7N2    | USA          | NA                  | 1996 | duck              | CY035565 | A/duck/New York/Sg-00291/1996(H7N2)                |
| 197            | HA                   | H7N2    | USA          | NA                  | 1996 | duck              | CY035546 | A/duck/New Jersey/Sg-00286/1996(H7N2)              |
| 198            | HA                   | H7N2    | USA          | NA                  | 1996 | turkey            | CY035538 | A/turkey/New York/Sg-00284/1996(H7N2)              |
| 199            | HA                   | H7N2    | USA          | NA                  | 2005 | chicken           | CY034302 | A/chicken/New York/23165-10/2005(H7N2)             |
| 200            | HA                   | H7N2    | USA          | NA                  | 1995 | chicken           | CY035519 | A/chicken/New York/Sg-00279/1995(H7N2)             |
| 201            | HA                   | H7N2    | USA          | NA                  | 1995 | chicken           | CY035491 | A/chicken/New York/Sg-00270/1995(H7N2)             |
| 202            | HA                   | H7N3    | USA          | NA                  | 1994 | chicken           | CY035466 | A/chicken/New Jersey/Sg-00258/1994(H7N3)           |
| 203            | HA                   | H7N2    | USA          | NA                  | 2005 | chicken           | CY034838 | A/chicken/New York/10508/2005(H7N2)                |
| 204            | HA                   | H7N3    | USA          | NA                  | 2006 | laughing gull     | EU030984 | A/laughing gull/Delaware/42/06(H7N3)               |
| 205            | HA                   | H7N2    | USA          | NA                  | 2003 | chicken           | EU742995 | A/chicken/CT/260413-2/2003(H7N2)                   |
| 206            | HA                   | H7N2    | USA          | NA                  | 2005 | chicken           | CY037015 | A/chicken/New York/63806-11/2005(H7N2)             |
| 207            | HA                   | H7N2    | USA          | NA                  | 2006 | chicken           | CY028628 | A/chicken/New York/29047-4/2006(H7N2)              |
| 208            | HA                   | H7N2    | USA          | NA                  | 2005 | chicken           | CY031683 | A/chicken/New York/23164-5/2005(H7N2)              |
| 209            | HA                   | H7N2    | USA          | NA                  | 2005 | chicken           | CY033305 | A/chicken/New York/63806-8/2005(H7N2)              |

| # <sup>1</sup> | Protein <sup>2</sup> | Subtype | country | Region <sup>3</sup> | Year | Animal            | GenBank  | Virus name                                         |
|----------------|----------------------|---------|---------|---------------------|------|-------------------|----------|----------------------------------------------------|
| 210            | HA                   | H7N2    | USA     | NA                  | 1999 | chicken           | EU742978 | A/chicken/NJ/16224-6/1999(H7N2)                    |
| 211            | HA                   | H7N2    | USA     | NA                  | 2005 | chicken           | CY034246 | A/chicken/New York/19499/2005(H7N2)                |
| 212            | HA                   | H7N2    | USA     | NA                  | 2005 | guinea fowl       | CY031763 | A/Guinea fowl/New York/37982-3/2005(H7N2)          |
| 213            | HA                   | H7N2    | USA     | NA                  | 2005 | chukar            | CY022765 | A/chukar/New York/11653-1/2005(H7N2)               |
| 214            | HA                   | H7N2    | USA     | NA                  | 1994 | chicken           | AF072384 | A/Chicken/New York/13142-5/94 (H7N2)               |
| 215            | HA                   | H7N2    | USA     | NA                  | 1994 | turkey            | AF072386 | A/turkey/New York/4450-5/94 (H7N2)                 |
| 216            | HA                   | H7N2    | USA     | NA                  | 1997 | chicken           | AF072395 | A/Chicken/Pennsylvania/11767-1/97(H7N2)            |
| 217            | HA                   | H7N2    | USA     | NA                  | 1998 | chicken           | AF072398 | A/Chicken/Pennsylvania/13552-1/98 (H7N2)           |
| 218            | HA                   | H7N2    | USA     | NA                  | 2000 | avian             | AY240879 | A/avian/NY/74211-2/00(H7N2)                        |
| 219            | HA                   | H7N2    | USA     | NA                  | 2001 | chicken           | AY240884 | A/chicken/NJ/118878-5/2001(H7N2)                   |
| 220            | HA                   | H7N2    | USA     | NA                  | 2002 | chicken           | AY240885 | A/chicken/NJ/150383-7/02(H7N2)                     |
| 221            | HA                   | H7N2    | USA     | NA                  | 2002 | chicken           | AY240886 | A/chicken/NJ/151244-18/02(H7N2)                    |
| 222            | HA                   | H7N2    | USA     | NA                  | 1999 | chicken           | AY240887 | A/chicken/NJ/15814-9/99(H7N2)                      |
| 223            | HA                   | H7N2    | USA     | NA                  | 2002 | turkey            | AY240913 | A/turkey/VA/66/02(H7N2)                            |
| 224            | HA                   | H7N2    | USA     | NA                  | 2002 | turkey            | AY240914 | A/turkey/VA/67/02(H7N2)                            |
| 225            | HA                   | H7N2    | USA     | NA                  | 1998 | chicken           | AY240917 | A/chicken/NY/3572/98(H7N2)                         |
| 226            | HA                   | H7N2    | USA     | NA                  | 1999 | chicken           | AY240918 | A/chicken/NJ/15827/99(H7N2)                        |
| 227            | HA                   | H7N2    | USA     | NA                  | 1999 | chicken           | AY240919 | A/chicken/NY/1398-6/99(H7N2)                       |
| 228            | HA                   | H7N2    | USA     | NA                  | 1999 | chicken           | AY240920 | A/chicken/NY/34173-3/99(H7N2)                      |
| 229            | HA                   | H7N2    | USA     | NA                  | 1998 | Goose             | AY240922 | A/Goose/New Jersey/8600-3/98(H7N2)                 |
| 230            | HA                   | H7N2    | USA     | NA                  | 2000 | avian             | AY240925 | A/avian/NY/73063-6/00(H7N2)                        |
| 231            | HA                   | H7N3    | USA     | NA                  | 1971 | turkey            | M31689   | A/turkey/Oregon/1971(H7N3)                         |
| 232            | HA                   | H7N3    | USA     | NA                  | 2008 | green winged teal | CY039540 | A/green winged teal/California/AKS1370/2008(H7N3)  |
| 233            | HA                   | H7N3    | USA     | NA                  | 2008 | northern shoveler | CY039596 | A/northern shoveler/California/HKWF2031/2008(H7N3) |
| 234            | HA                   | H7N2    | USA     | NA                  | 1996 | goose             | CY035561 | A/goose/New Jersey/Sg-00290/1996(H7N2)             |
| 235            | HA                   | H7N2    | USA     | NA                  | 1996 | chicken           | CY035554 | A/chicken/New York/Sg-00288/1996(H7N2)             |
| 236            | HA                   | H7N2    | USA     | NA                  | 2005 | chukar            | CY031068 | A/chukar/New York/23164-13/2005(H7N2)              |
| 237            | HA                   | H7N7    | USA     | NA                  | 1927 | fowl              | CY014992 | A/fowl/Dobson/1927(H7N7)                           |
| 238            | HA                   | H7N9    | USA     | NA                  | 1988 | turkey            | CY014786 | A/turkey/Minnesota/1/1988(H7N9)                    |
| 239            | HA                   | H7N3    | USA     | NA                  | 2004 | blue winged teal  | CY018901 | A/blue-winged teal/Ohio/658/2004(H7N3)             |
| 240            | HA                   | H7N3    | USA     | NA                  | 2001 | black duck        | CY020885 | A/Black Duck/Ohio/415/2001(H7N3)                   |
| 241            | HA                   | H7N3    | USA     | NA                  | 1995 | turkey            | EF470585 | A/turkey/Utah/24721-10/1995(H7N3)                  |
| 242            | HA                   | H7N3    | USA     | NA                  | 2001 | black duck        | EU684257 | A/black duck/MD/415/2001(H7N3)                     |
| 243            | HA                   | H7N7    | USA     | NA                  | 2006 | ruddy turnstone   | EU684262 | A/ruddy turnstone/DE/892/2006(H7N7)                |
| 244            | HA                   | H7N2    | USA     | NA                  | 2004 | chicken           | EU743253 | A/chicken/NJ/294508-12/2004(H7N2)                  |
| 245            | HA                   | H7N2    | USA     | NA                  | 2005 | turkey            | CY034894 | A/turkey/New York/122501-2/2005(H7N2)              |
| 246            | HA                   | H7N2    | USA     | NA                  | 2005 | guinea fowl       | CY034830 | A/Guinea fowl/New York/101276-1/2005(H7N2)         |
| 247            | HA                   | H7N2    | USA     | NA                  | 2005 | duck              | CY034814 | A/duck/New York/98616-5/2005(H7N2)                 |
| 248            | HA                   | H7N2    | USA     | NA                  | 2005 | guinea fowl       | CY031723 | A/Guinea fowl/New York/23165-12/2005(H7N2)         |
| 249            | HA                   | H7N2    | USA     | NA                  | 2005 | quail             | CY033313 | A/quail/New York/63806-13/2005(H7N2)               |
| 250            | HA                   | H7N2    | USA     | NA                  | 1995 | chicken           | CY035512 | A/chicken/New York/Sg-00277/1995(H7N2)             |
| 251            | HA                   | H7N2    | USA     | NA                  | 2006 | chicken           | CY035986 | A/chicken/New York/19495-4/2006(H7N2)              |
| 252            | HA                   | H7N2    | USA     | NA                  | 2006 | chicken           | CY028580 | A/chicken/New York/8391-2/2006(H7N2)               |
| 253            | HA                   | H7N2    | USA     | NA                  | 2005 | guinea fowl       | CY031675 | A/Guinea fowl/New York/23164-3-05/2005(H7N2)       |
| 254            | HA                   | H7N2    | USA     | NA                  | 2005 | chicken           | CY031635 | A/chicken/New York/22067-7/2005(H7N2)              |
| 255            | HA                   | H7N2    | USA     | NA                  | 2005 | chicken           | CY033241 | A/chicken/New York/30732-9/2005(H7N2)              |
| 256            | HA                   | H7N2    | USA     | NA                  | 2005 | chicken           | CY034190 | A/chicken/New York/143646-2/2005(H7N2)             |
| 257            | HA                   | H7N2    | USA     | NA                  | 1995 | chicken           | CY035470 | A/chicken/New York/Sg-00261/1995(H7N2)             |
| 258            | HA                   | H7N3    | USA     | NA                  | 1998 | Mallard           | CY016188 | A/Mallard/Ohio/322/1998(H7N3)                      |
| 259            | HA                   | H7N7    | USA     | NA                  | 1988 | ruddy turnstone   | CY005980 | A/ruddy turnstone/DE/2378/1988(H7N7)               |
| 260            | HA                   | H7N8    | USA     | NA                  | 1987 | mallard           | CY021621 | A/mallard/Ohio/421/1987(H7N8)                      |
| 261            | HA                   | H7N2    | USA     | NA                  | 1996 | chicken           | AF072393 | A/Chicken/New York/8030-2/96 (H7N2)                |
| 262            | HA                   | H7N3    | USA     | NA                  | 1971 | turkey            | DQ870894 | A/turkey/Oregon/1971(H7N3)                         |
| 263            | HA                   | H7N2    | USA     | NA                  | 2006 | chicken           | DQ873807 | A/chicken/NY/3181-5/06(H7N2)                       |
| 264            | HA                   | H7N3    | USA     | NA                  | 1971 | turkey            | DQ870888 | A/turkey/Oregon/1971(H7N3)                         |
| 265            | HA                   | H7N2    | USA     | NA                  | 2005 | chicken           | CY024834 | A/chicken/New York/21211-1/2005(H7N2)              |
| 266            | HA                   | H7N2    | USA     | NA                  | 2001 | chicken           | AY240891 | A/chicken/NY/119256-7/2001(H7N2)                   |
| 267            | HA                   | H7N3    | USA     | NA                  | 1999 | chicken           | AY240892 | A/chicken/New York/12273-11/1999(H7N3)             |
| 268            | HA                   | H7N2    | USA     | NA                  | 1998 | chicken           | AY240893 | A/chicken/NY/1387-8/98(H7N2)                       |
| 269            | HA                   | H7N3    | USA     | NA                  | 1999 | chicken           | AY240894 | A/chicken/New York/14714-9/1999(H7N3)              |
| 270            | HA                   | H7N2    | USA     | NA                  | 2002 | turkey            | AY240912 | A/turkey/VA/55/2002(H7N2)                          |
| 271            | HA                   | H7N2    | USA     | NA                  | 2004 | chicken           | AY831670 | A/chicken/MD/MINH MA/2004(H7N2)                    |
| 272            | HA                   | H7N3    | USA     | NA                  | 1971 | turkey            | AB269693 | A/turkey/Oregon/1971(H7N3)                         |
| 273            | HA                   | H7N3    | USA     | NA                  | 2001 | duck              | EU743008 | A/duck/PA/143585/2001(H7N3)                        |
| 274            | HA                   | H7N2    | USA     | NA                  | 2002 | turkey            | EU743261 | A/turkey/VA/158512/2002(H7N2)                      |
| 275            | HA                   | H7N2    | USA     | NA                  | 2005 | turkey            | CY031715 | A/turkey/New York/23164-11/2005(H7N2)              |
| 276            | HA                   | H7N2    | USA     | NA                  | 1995 | emu               | EU980454 | A/emu/TX/25414/1995(H7N2)                          |
| 277            | HA                   | H7N2    | USA     | NA                  | 2005 | duck              | CY034806 | A/duck/New York/98616-4/2005(H7N2)                 |
| 278            | HA                   | H7N2    | USA     | NA                  | 2005 | chicken           | CY034798 | A/chicken/New York/88291-8/2005(H7N2)              |
| 279            | HA                   | H7N3    | USA     | NA                  | 2006 | shorebird         | CY036767 | A/shorebird/Delaware Bay/560/2006(H7N3)            |



| # <sup>1</sup> | Protein <sup>2</sup> | Subtype | country | Region <sup>3</sup> | Year | Animal            | GenBank  | Virus name                                          |
|----------------|----------------------|---------|---------|---------------------|------|-------------------|----------|-----------------------------------------------------|
| 280            | HA                   | H7N3    | USA     | NA                  | 2007 | northern pintail  | FJ520108 | A/northern pintail/California/44387-486/2007(H11N9) |
| 281            | HA                   | H7N2    | USA     | NA                  | 2006 | chicken           | CY036010 | A/chicken/New York/19499-1/2006(H7N2)               |
| 282            | HA                   | H7N2    | USA     | NA                  | 2006 | muscovy duck      | CY036002 | A/Muscovy duck/New York/19495-7/2006(H7N2)          |
| 283            | HA                   | H7N2    | USA     | NA                  | 2006 | guinea fowl       | CY035994 | A/Guinea fowl/New York/19495-6/2006(H7N2)           |
| 284            | HA                   | H7N2    | USA     | NA                  | 2005 | guinea fowl       | CY035954 | A/Guinea fowl/New York/11646-3/2005(H7N2)           |
| 285            | HA                   | H7N2    | USA     | NA                  | 2006 | chicken           | CY034902 | A/chicken/New York/19495-2/2006(H7N2)               |
| 286            | HA                   | H7N3    | USA     | NA                  | 2006 | ruddy turnstone   | CY037103 | A/ruddy turnstone/Delaware Bay/283/2006(H7N3)       |
| 287            | HA                   | H7N2    | USA     | NA                  | 2005 | chicken           | CY031076 | A/chicken/New York/23165-6/2005(H7N2)               |
| 288            | HA                   | H7N2    | USA     | NA                  | 2005 | chicken           | CY031116 | A/chicken/New York/30732-6/2005(H7N2)               |
| 289            | HA                   | H7N2    | USA     | NA                  | 2002 | chicken           | CY014896 | A/chicken/Pennsylvania/143586/2002(H7N2)            |
| 290            | HA                   | H7N2    | USA     | NA                  | 2005 | chicken           | CY031747 | A/chicken/New York/31621-9/2005(H7N2)               |
| 291            | HA                   | H7N2    | USA     | NA                  | 2005 | chicken           | CY033233 | A/chicken/New York/30732-8/2005(H7N2)               |
| 292            | HA                   | H7N3    | USA     | NA                  | 2004 | green winged teal | EU684259 | A/green-winged teal/MD/648/2004(H7N3)               |
| 293            | HA                   | H7N3    | USA     | NA                  | 2004 | blue winged teal  | EU684260 | A/blue-winged teal/MD/658/2004(H7N3)                |
| 294            | HA                   | H7N2    | USA     | NA                  | 1995 | guinea fowl       | CY035495 | A/guinea fowl/New York/Sg-00271/1995(H7N2)          |
| 295            | HA                   | H7N2    | USA     | NA                  | 2005 | quail             | CY034390 | A/quail/New York/89641/2005(H7N2)                   |
| 296            | HA                   | H7N2    | USA     | NA                  | 2005 | duck              | CY034374 | A/duck/New York/88291-13/2005(H7N2)                 |
| 297            | HA                   | H7N2    | USA     | NA                  | 2005 | chicken           | CY034342 | A/chicken/New York/63806-12/2005(H7N2)              |
| 298            | HA                   | H7N2    | USA     | NA                  | 2005 | guinea fowl       | CY033281 | A/Guinea fowl/New York/31621-8/2005(H7N2)           |
| 299            | HA                   | H7N2    | USA     | NA                  | 1996 | turkey            | CY035550 | A/turkey/New Jersey/Sg-00287/1996(H7N2)             |
| 300            | HA                   | H7N2    | USA     | NA                  | 1996 | chicken           | CY035542 | A/chicken/New York/Sg-00285/1996(H7N2)              |
| 301            | HA                   | H7N2    | USA     | NA                  | 1996 | chicken           | CY035569 | A/chicken/New Jersey/Sg-00292/1996(H7N2)            |
| 302            | HA                   | H7N2    | USA     | NA                  | 2005 | chicken           | CY031691 | A/chicken/New York/23164-7/2005(H7N2)               |
| 303            | HA                   | H7N2    | USA     | NA                  | 2004 | chicken           | AY831669 | A/chicken/DE/VIV A/2004(H7N2)                       |
| 304            | HA                   | H7N2    | USA     | NA                  | 2001 | avian             | AY240877 | A/avian/NY/118353-1/2001(H7N2)                      |
| 305            | HA                   | H7N2    | USA     | NA                  | 2000 | avian             | AY240878 | A/avian/NY/70411-12/00(H7N2)                        |
| 306            | HA                   | H7N2    | USA     | NA                  | 2000 | avian             | AY240880 | A/avian/NY/76247-3/00(H7N2)                         |
| 307            | HA                   | H7N2    | USA     | NA                  | 2000 | avian             | AY240882 | A/avian/NY/7729-6/00(H7N2)                          |
| 308            | HA                   | H7N2    | USA     | NA                  | 2001 | chicken           | AY240890 | A/chicken/NY/119055-7/01(H7N2)                      |
| 309            | HA                   | H7N2    | USA     | NA                  | 1999 | chicken           | AY240895 | A/chicken/NY/21586-8/1999(H7N2)                     |
| 310            | HA                   | H7N2    | USA     | NA                  | 2000 | chicken           | AY240897 | A/chicken/NY/30749-3/2000(H7N2)                     |
| 311            | HA                   | H7N2    | USA     | NA                  | 1999 | chicken           | AY240907 | A/chicken/NY/14858-12/1999(H7N2)                    |
| 312            | HA                   | H7N2    | USA     | NA                  | 1998 | guineafowl        | AY240909 | A/guineafowl/NJ/13246-9/98(H7N2)                    |
| 313            | HA                   | H7N2    | USA     | NA                  | 2002 | turkey            | AY240910 | A/turkey/NC/11165/02(H7N2)                          |
| 314            | HA                   | H7N2    | USA     | NA                  | 1999 | chicken           | AY240916 | A/Chicken/New Jersey/20621/99(H7N2)                 |
| 315            | HA                   | H7N2    | USA     | NA                  | 1999 | chicken           | AY240921 | A/Chicken/NY/14714-2/1999(H7N3)                     |
| 316            | HA                   | H7N2    | USA     | NA                  | 1998 | quail             | AY240924 | A/quail/PA/20304/1998(H7N2)                         |
| 317            | HA                   | H7N2    | USA     | NA                  | 2006 | guinea fowl       | CY028572 | A/Guinea fowl/New York/8391-1/2006(H7N2)            |
| 318            | HA                   | H7N9    | USA     | NA                  | 2006 | blue winged teal  | CY024818 | A/blue-winged teal/Ohio/566/2006(H7N9)              |
| 319            | HA                   | H7N3    | USA     | NA                  | 2005 | mallard           | CY021637 | A/mallard/Delaware/418/2005(H7N3)                   |
| 320            | HA                   | H7N2    | USA     | NA                  | 1995 | chicken           | AF072388 | A/Chicken/New York/13833-7/95 (H7N2)                |
| 321            | HA                   | H7N2    | USA     | NA                  | 1997 | chicken           | AF072396 | A/Chicken/New York/6777-3/97(H7N2)                  |
| 322            | HA                   | H7N2    | USA     | NA                  | 1998 | quail             | AF072399 | A/quail/NY/13989-51/1998(H7N2)                      |
| 323            | HA                   | H7N2    | USA     | NA                  | 2005 | chicken           | CY022821 | A/chicken/New York/16330/2005(H7N2)                 |
| 324            | HA                   | H7N7    | USA     | NA                  | 1989 | red knot          | CY005981 | A/red knot/NJ/325/1989(H7N7)                        |
| 325            | HA                   | H7N2    | USA     | NA                  | 2004 | chicken           | AY831668 | A/chicken/DE/HOBO/2004(H7N2)                        |
| 326            | HA                   | H7N2    | USA     | NA                  | 2000 | avian             | AY240881 | A/avian/NY/81746-5/00(H7N2)                         |
| 327            | HA                   | H7N2    | USA     | NA                  | 2001 | chicken           | AY240883 | A/chicken/FL/90348-4/2001(H7N2)                     |
| 328            | HA                   | H7N2    | USA     | NA                  | 2002 | chicken           | AY240888 | A/chicken/NJ/608/02(H7N2)                           |
| 329            | HA                   | H7N2    | USA     | NA                  | 1999 | chicken           | AY240896 | A/chicken/NY/22409-4/99(H7N2)                       |
| 330            | HA                   | H7N2    | USA     | NA                  | 2002 | chicken           | AY240900 | A/chicken/PA/149092-1/2002(H7N2)                    |
| 331            | HA                   | H7N2    | USA     | NA                  | 2002 | chicken           | AY240906 | A/chicken/VA/32/02(H7N2)                            |
| 332            | HA                   | H7N2    | USA     | NA                  | 2002 | guineafowl        | AY240908 | A/guineafowl/MA/148081-11/02(H7N2)                  |
| 333            | HA                   | H7N2    | USA     | NA                  | 1999 | chicken           | AY240915 | A/chicken/NJ/17206/99(H7N2)                         |
| 334            | HA                   | H7N2    | USA     | NA                  | 1999 | quail             | AY240923 | A/quail/NY/11430/99(H7N2)                           |
| 335            | HA                   | H7N2    | USA     | NA                  | 2006 | guinea fowl       | CY028596 | A/Guinea fowl/New York/19501-4/2006(H7N2)           |
| 336            | HA                   | H7N2    | USA     | NA                  | 2005 | chicken           | CY022813 | A/chicken/New York/16326-5/2005(H7N2)               |
| 337            | HA                   | H7N2    | USA     | NA                  | 2005 | chicken           | CY022829 | A/chicken/New York/21211-2/2005(H7N2)               |
| 338            | HA                   | H7N2    | USA     | NA                  | 1997 | turkey            | AF072397 | A/turkey/PA/7975/1997(H7N2)                         |
| 339            | HA                   | H7N3    | USA     | NA                  | 1985 | ruddy turnstone   | CY005928 | A/ruddy turnstone/New Jersey/65/1985(H7N3)          |
| 340            | HA                   | H7N2    | USA     | NA                  | 2006 | guineafowl        | DQ907528 | A/guineafowl/NY/4649-18/2006(H7N2)                  |
| 341            | HA                   | H7N3    | USA     | NA                  | 1980 | pheasant          | CY014721 | A/pheasant/Minnesota/917/1980(H7N3)                 |
| 342            | HA                   | H7N3    | USA     | NA                  | 1980 | turkey            | CY014778 | A/turkey/Minnesota/1200/1980(H7N3)                  |
| 343            | HA                   | H7N2    | USA     | NA                  | 2006 | guinea fowl       | CY034238 | A/Guinea fowl/New York/32084/2006(H7N2)             |
| 344            | HA                   | H7N1    | USA     | NA                  | 1993 | rhea              | EF470586 | A/rhea/North Carolina/39482/1993(H7N1)              |
| 345            | HA                   | H7N2    | USA     | NA                  | 2005 | duck              | CY022845 | A/duck/New York/21211-6/2005(H7N2)                  |
| 346            | HA                   | H7N2    | USA     | NA                  | 2005 | chicken           | CY031771 | A/chicken/New York/42217/2005(H7N2)                 |
| 347            | HA                   | H7N3    | USA     | NA                  | 2006 | shorebird         | EU030968 | A/shorebird/Delaware/22/06(H7N3)                    |
| 348            | HA                   | H7N3    | USA     | NA                  | 2001 | mallard           | EU684258 | A/mallard/MD/423/2001(H7N3)                         |
| 349            | HA                   | H7N9    | USA     | NA                  | 2000 | ruddy turnstone   | EU684261 | A/ruddy turnstone/DE/1538/2000(H7N9)                |
| 350            | HA                   | H7N2    | USA     | NA                  | 2005 | muscovy duck      | CY031707 | A/Muscovy duck/New York/23164-10/2005(H7N2)         |

| # <sup>1</sup> | Protein <sup>2</sup> | Subtype | country     | Region <sup>3</sup> | Year | Animal              | GenBank  | Virus name                                 |
|----------------|----------------------|---------|-------------|---------------------|------|---------------------|----------|--------------------------------------------|
| 351            | HA                   | H7N2    | USA         | NA                  | 2005 | guinea fowl         | CY031651 | A/Guinea fowl/New York/22071/2005(H7N2)    |
| 352            | HA                   | H7N2    | USA         | NA                  | 2005 | chicken             | CY035978 | A/chicken/New York/122501-1/2005(H7N2)     |
| 353            | HA                   | H7N2    | USA         | NA                  | 2005 | muscovy duck        | CY034790 | A/Muscovy duck/New York/87493-3/2005(H7N2) |
| 354            | HA                   | H7N2    | USA         | NA                  | 2005 | muscovy duck        | CY034846 | A/Muscovy duck/New York/11646-4/2005(H7N2) |
| 355            | HA                   | H7N2    | USA         | NA                  | 1997 | chicken             | EU742961 | A/chicken/PA/19241/1997(H7N2)              |
| 356            | HA                   | H7N3    | USA         | NA                  | 1993 | duck                | AB450437 | A/duck/Alaska/3111/1993(H7N3)              |
| 357            | HA                   | H7N2    | USA         | NA                  | 2005 | guinea fowl         | CY037063 | A/Guinea fowl/New York/98616-3/2005(H7N2)  |
| 358            | HA                   | H7N1    | USA         | NA                  | 1993 | rhea                | FJ610056 | A/rhea/North Carolina/39482/1993(H7N1)     |
| 359            | HA                   | H7N2    | USA         | NA                  | 2001 | guinea fowl         | EU742912 | A/guinea fowl/NJ/119063-8/2001(H7N2)       |
| 360            | HA                   | H7N2    | USA         | NA                  | 1994 | guinea fowl         | CY035462 | A/guinea fowl/New York/Sg-00257/1994(H7N2) |
| 361            | HA                   | H7N2    | USA         | NA                  | 1995 | chicken             | CY035504 | A/chicken/New York/Sg-00274/1995(H7N2)     |
| 362            | HA                   | H7N2    | USA         | NA                  | 1995 | chicken             | CY035522 | A/chicken/New Jersey/Sg-00280/1995(H7N2)   |
| 363            | HA                   | H7N2    | USA         | NA                  | 1996 | chicken             | CY035526 | A/chicken/New York/Sg-00281/1996(H7N2)     |
| 364            | HA                   | H7N3    | USA         | NA                  | 1979 | turkey              | AB269692 | A/turkey/Tennessee/1/1979(H7N3)            |
| 365            | HA                   | H7N3    | USA         | NA                  | 2006 | laughing gull       | CY037087 | A/laughing gull/Delaware Bay/46/2006(H7N3) |
| 366            | HA                   | H7N2    | USA         | NA                  | 2005 | chicken             | CY037095 | A/chicken/New York/87493-2/2005(H7N2)      |
| 367            | HA                   | H7N2    | USA         | NA                  | 2006 | chicken             | CY031188 | A/chicken/New York/46545-2/2006(H7N2)      |
| 368            | HA                   | H7N7    | USA         | NA                  | 2007 | mallard             | CY033380 | A/mallard/California/HKWF1971/2007(H7N7)   |
| 369            | HA                   | H7N2    | USA         | NA                  | 2005 | guinea fowl         | CY028507 | A/Guinea fowl/New York/143646-3/2005(H7N2) |
| 370            | HA                   | H7N2    | USA         | NA                  | 2006 | chicken             | CY028540 | A/chicken/New York/3181-5/2006(H7N2)       |
| 371            | HA                   | H7N1    | Zimbabwe    | E                   | 1996 | ostrich             | AF202234 | A/ostrich/Zimbabwe/222/96(H7N1)            |
| 1              | M1                   | H7N7    | Australia   | A                   | 1985 | starling            | CY024779 | A/starling/Victoria/85(H7N7)               |
| 2              | M1                   | H7N4    | Australia   | A                   | 1997 | chicken             | CY022702 | A/chicken/New South Wales/327/97(H7N4)     |
| 3              | M1                   | H7N7    | Australia   | A                   | 1985 | chicken             | CY025070 | A/chicken/Victoria/1/85(H7N7)              |
| 4              | M1                   | H7N4    | Australia   | A                   | 1997 | emu                 | CY022710 | A/emu/New South Wales/775/97(H7N4)         |
| 5              | M1                   | H7N7    | Australia   | A                   | 1976 | duck                |          | A/duck/Victoria/76(H7N7)                   |
| 6              | M1                   | H7N6    | Australia   | A                   | 2007 | duck                |          | A/duck/Victoria/512/2007(H7N6)             |
| 7              | M1                   | H7N7    | New Zealand | NZ                  | 2005 | duck                |          | A/duck/New Zealand/2005(H7N7)              |
| 8              | M1                   | H7N3    | Australia   | A                   | 1994 | chicken             | CY022686 | A/chicken/Queensland/1994(H7N3)            |
| 9              | M1                   | H7N4    | Australia   | A                   | 1997 | chicken             | CY022694 | A/chicken/New South Wales/2/1997(H7N4)     |
| 10             | M1                   | H7N7    | Australia   | A                   | 1976 | chicken             | CY024787 | A/chicken/Victoria/1976(H7N7)              |
| 11             | M1                   | H7N3    | Australia   | A                   | 1992 | chicken             | CY025078 | A/chicken/Victoria/224/1992(H7N3)          |
| 12             | M1                   | H7N2    | Australia   | A                   | 2007 | duck                | CY033162 | A/duck/Tasmania/277/2007(H7N2)             |
| 13             | M1                   | H7N3    | Bolivia     | SA                  | 2001 | cinnamon teal       | DQ525415 | A/cinnamon teal/Bolivia/4537/2001(H7N3)    |
| 14             | M1                   | H7N3    | Canada      | NA                  | 1977 | gadwall duck        | CY005033 | A/gadwall duck/Alberta/291/1977(H7N3)      |
| 15             | M1                   | H7N3    | Canada      | NA                  | 2004 | chicken             | AY611525 | A/chicken/British Columbia/04(H7N3)        |
| 16             | M1                   | H7N3    | Canada      | NA                  | 1985 | green winged teal   | CY005051 | A/green-winged teal/ALB/228/1985(H7N3)     |
| 17             | M1                   | H7N3    | Canada      | NA                  | 2004 | chicken             | AY650271 | A/GSC_chicken/British Columbia/04(H7N3)    |
| 18             | M1                   | H7N3    | Canada      | NA                  | 1976 | mallard duck        | CY004325 | A/mallard duck/ALB/48/1976(H7N3)           |
| 19             | M1                   | H7N3    | Canada      | NA                  | 2007 | chicken             | EU500863 | A/chicken/SK/HR-00011/2007(H7N3)           |
| 20             | M1                   | H7N3    | Canada      | NA                  | 2007 | American black duck | EU500855 | A/American black duck/NB/2538/2007(H7N3)   |
| 21             | M1                   | H7N3    | Canada      | NA                  | 1985 | mallard duck        | CY005058 | A/mallard duck/Alberta/435/1985(H7N3)      |
| 22             | M1                   | H7N3    | Canada      | NA                  | 2007 | Canada goose        | EU500847 | A/Canada goose/BC/3752/2007(H7N3)          |
| 23             | M1                   | H7N3    | Canada      | NA                  | 2004 | chicken             | AY677732 | A/chicken/British Columbia/CN7-3/04 (H7N3) |
| 24             | M1                   | H7N3    | Canada      | NA                  | 2001 | mallard             | DQ017502 | A/mallard/Alberta/24/01(H7N3)              |
| 25             | M1                   | H7N5    | Canada      | NA                  | 1977 | mallard duck        | CY005009 | A/mallard duck/ALB/224/1977(H7N5)          |
| 26             | M1                   | H7N8    | Canada      | NA                  | 1979 | pintail duck        | CY005039 | A/pintail duck/Alberta/291/1979(H7N8)      |
| 27             | M1                   | H7N3    | Chile       | SA                  | 2002 | chicken             | AY303653 | A/chicken/Chile/4322/02(H7N3)              |
| 28             | M1                   | H7N3    | Chile       | SA                  | 2002 | chicken             | AY303652 | A/chicken/Chile/176822/02(H7N3)            |
| 29             | M1                   | H7N2    | China       | E                   | 2002 | chicken             | AY724263 | A/chicken/Hebei/1/2002(H7N2)               |
| 30             | M1                   | H7N1    | China       | E                   | 1992 | duck                | CY005494 | A/duck/Nanchang/1904/1992(H7N1)            |
| 31             | M1                   | H7N7    | China       | E                   | 2003 | duck                | EU158116 | A/duck/Jiangxi/1742/03(H7N7)               |
| 32             | M1                   | H7N7    | China       | E                   | 2003 | duck                | EU158112 | A/duck/Jiangxi/1814/03(H7N7)               |
| 33             | M1                   | H7N1    | France      | E                   | 2001 | mallard             | AM157380 | A/mallard/France/2526/2001(H7N1)           |
| 34             | M1                   | H7N1    | France      | E                   | 2001 | mallard             | AM157379 | A/mallard/France/2525/2001(H7N1)           |
| 35             | M1                   | H7N1    | Germany     | E                   | 1934 | chicken             | CY015047 | A/chicken/Rostock/45/1934(H7N1)            |
| 36             | M1                   | H7N7    | Germany     | E                   | 1979 | goose               | CY015040 | A/goose/Leipzig/187-7/1979(H7N7)           |
| 37             | M1                   | H7N1    | Germany     | E                   | 1934 | chicken             | M55474   | A/chicken/Rostock/8/1934(H7N1)             |
| 38             | M1                   | H7N2    | Hong Kong   | E                   | 1978 | duck                | CY005619 | A/duck/Hong Kong/293/1978(H7N2)            |
| 39             | M1                   | H7N1    | Italy       | E                   | 2000 | ostrich             | DQ991307 | A/ostrich/Italy/2332/00(H7N1)              |
| 40             | M1                   | H7N3    | Italy       | E                   | 2004 | turkey              | CY028677 | A/turkey/Italy/3829/2004(H7N3)             |
| 41             | M1                   | H7N3    | Italy       | E                   | 2003 | turkey              | CY028669 | A/turkey/Italy/2685/2003(H7N3)             |
| 42             | M1                   | H7N1    | Italy       | E                   | 2000 | turkey              | CY021542 | A/turkey/Italy/4426/2000(H7N1)             |
| 43             | M1                   | H7N1    | Italy       | E                   | 2000 | quail               | CY022670 | A/quail/Italy/396/2000(H7N1)               |
| 44             | M1                   | H7N3    | Italy       | E                   | 2004 | turkey              | CY020582 | A/turkey/Italy/4479/2004(H7N3)             |
| 45             | M1                   | H7N3    | Italy       | E                   | 2003 | turkey              | CY021358 | A/turkey/Italy/3620/2003(H7N3)             |
| 46             | M1                   | H7N3    | Italy       | E                   | 2003 | turkey              | EU158113 | A/turkey/Italy/97500/03(H7N3)              |
| 47             | M1                   | H7N3    | Italy       | E                   | 2002 | turkey              | CY029906 | A/turkey/Italy/8535/2002(H7N3)             |
| 48             | M1                   | H7N3    | Italy       | E                   | 2004 | turkey              | CY029914 | A/turkey/Italy/4130/2004(H7N3)             |
| 49             | M1                   | H7N1    | Italy       | E                   | 1999 | turkey              | CY025190 | A/turkey/Italy/1265/1999(H7N1)             |

| # <sup>1</sup> | Protein <sup>2</sup> | Subtype | country     | Region <sup>3</sup> | Year | Animal           | GenBank  | Virus name                                  |
|----------------|----------------------|---------|-------------|---------------------|------|------------------|----------|---------------------------------------------|
| 50             | M1                   | H7N1    | Italy       | E                   | 1999 | turkey           | CY021406 | A/turkey/Italy/4580/1999(H7N1)              |
| 51             | M1                   | H7N1    | Italy       | E                   | 2001 | turkey           | CY021422 | A/turkey/Italy/1351/2001(H7N1)              |
| 52             | M1                   | H7N7    | Italy       | E                   | 1902 | chicken          | CY015054 | A/chicken/Brescia/1902(H7N7)                |
| 53             | M1                   | H7N3    | Italy       | E                   | 2002 | turkey           | CY028661 | A/turkey/Italy/9742/2002(H7N3)              |
| 54             | M1                   | H7N3    | Italy       | E                   | 2003 | turkey           | EU158118 | A/turkey/Italy/121964/03(H7N3)              |
| 55             | M1                   | H7N1    | Italy       | E                   | 2002 | mallard          | EU158120 | A/mallard/Italy/250/02(H7N1)                |
| 56             | M1                   | H7N3    | Italy       | E                   | 2004 | turkey           | CY020598 | A/turkey/Italy/3807/2004(H7N3)              |
| 57             | M1                   | H7N1    | Italy       | E                   | 2000 | pekin duck       | CY024899 | A/pekin duck/Italy/1848/2000(H7N1)          |
| 58             | M1                   | H7N3    | Italy       | E                   | 2003 | turkey           | CY021366 | A/turkey/Italy/1010/2003(H7N3)              |
| 59             | M1                   | H7N3    | Italy       | E                   | 2003 | turkey           | CY021486 | A/turkey/Italy/4608/2003(H7N3)              |
| 60             | M1                   | H7N3    | Italy       | E                   | 2003 | turkey           | CY021494 | A/turkey/Italy/2987/2003(H7N3)              |
| 61             | M1                   | H7N1    | Italy       | E                   | 2001 | chicken          | CY021550 | A/chicken/Italy/322/2001(H7N1)              |
| 62             | M1                   | H7N1    | Italy       | E                   | 1999 | chicken          | CY022654 | A/chicken/Italy/4746/1999(H7N1)             |
| 63             | M1                   | H7N1    | Italy       | E                   | 2000 | ostrich          | DQ991338 | A/ostrich/Italy/984/00(H7N1)                |
| 64             | M1                   | H7N1    | Italy       | E                   | 2000 | chicken          | CY015015 | A/chicken/Italy/1285/2000(H7N1)             |
| 65             | M1                   | H7N7    | Italy       | E                   | 2005 | mallard          | EU158117 | A/mallard/Italy/299/05(H7N7)                |
| 66             | M1                   | H7N1    | Italy       | E                   | 1999 | chicken          | AJ416630 | A/Chicken/Italy/1067/99(H7N1)               |
| 67             | M1                   | H7N1    | Italy       | E                   | 1999 | turkey           | AJ627489 | A/turkey/Italy/4603/1999(H7N1)              |
| 68             | M1                   | H7N3    | Italy       | E                   | 2002 | turkey           | AJ627492 | A/turkey/Italy/214845/2002(H7N3)            |
| 69             | M1                   | H7N1    | Italy       | E                   | 1999 | turkey           | CY021414 | A/turkey/Italy/3675/1999(H7N1)              |
| 70             | M1                   | H7N1    | Italy       | E                   | 2000 | turkey           | CY024771 | A/turkey/Italy/1084/2000(H7N1)              |
| 71             | M1                   | H7N3    | Italy       | E                   | 2003 | turkey           | CY020590 | A/turkey/Italy/251/2003(H7N3)               |
| 72             | M1                   | H7N7    | Italy       | E                   | 1902 | chicken          | L37795   | A/chicken/Brescia/1902(H7N7)                |
| 73             | M1                   | H7N2    | Italy       | E                   | 2003 | quail            | CY021510 | A/quail/Italy/4610/2003(H7N2)               |
| 74             | M1                   | H7N1    | Italy       | E                   | 2000 | turkey           | CY021534 | A/turkey/Italy/2984/2000(H7N1)              |
| 75             | M1                   | H7N3    | Italy       | E                   | 2003 | turkey           | CY022614 | A/turkey/Italy/2043/2003(H7N3)              |
| 76             | M1                   | H7N1    | Italy       | E                   | 1999 | chicken          | DQ991323 | A/chicken/Italy/5093/99(H7N1)               |
| 77             | M1                   | H7N1    | Italy       | E                   | 1999 | chicken          | DQ991331 | A/chicken/Italy/5093/99(H7N1)               |
| 78             | M1                   | H7N1    | Italy       | E                   | 1999 | turkey           | CY025110 | A/turkey/Italy/4644/1999(H7N1)              |
| 79             | M1                   | H7N3    | Italy       | E                   | 2003 | chicken          | CY034751 | A/chicken/Italy/682/2003(H7N3)              |
| 80             | M1                   | H7N1    | Japan       | E                   | 2003 | duck             | AB428683 | A/duck/Hokkaido/143/2003(H7N1)              |
| 81             | M1                   | H7N1    | Mongolia    | E                   | 2002 | duck             | AB473546 | A/duck/Mongolia/867/2002(H7N1)              |
| 82             | M1                   | H7N1    | Mongolia    | E                   | 2001 | duck             | AB268555 | A/duck/Mongolia/47/2001(H7N1)               |
| 83             | M1                   | H7N3    | Netherlands | E                   | 2000 | mallard          | CY005845 | A/mallard/Netherlands/12/2000(H7N3)         |
| 84             | M1                   | H7N8    | Netherlands | E                   | 2006 | mallard          | CY041411 | A/mallard/Netherlands/33/2006(H7N8)         |
| 85             | M1                   | H7N7    | Netherlands | E                   | 2003 | chicken          | AY340091 | A/chicken/Netherlands/1/03(H7N7)            |
| 86             | M1                   | H7N3    | Pakistan    | E                   | 1995 | chicken          | CY015034 | A/chicken/Pakistan/34669/1995(H7N3)         |
| 87             | M1                   | H7N3    | Pakistan    | E                   | 2002 | chicken          | CY035826 | A/chicken/Rawalpindi/NARC68/2002(H7N3)      |
| 88             | M1                   | H7N3    | Pakistan    | E                   | 1998 | chicken          | CY037757 | A/chicken/Pakistan/c1998/1998(H7N3)         |
| 89             | M1                   | H7N3    | Pakistan    | E                   | 1995 | chicken          | CY035834 | A/chicken/Pakistan/34668/1995(H7N3)         |
| 90             | M1                   | H7N7    | UK          | E                   | 1934 | fowl             | M38299   | A/fowl/Weybridge(H7N7)                      |
| 91             | M1                   | H7N7    | UK          | E                   | 1934 | fowl             | L37797   | A/fowl/Weybridge(H7N7)                      |
| 92             | M1                   | H7N3    | UK          | E                   | 1963 | turkey           | CY015066 | A/turkey/England/1963(H7N3)                 |
| 93             | M1                   | H7N1    | UK          | E                   | 1979 | African starling | AY724262 | A/African starling/England-Q/983/1979(H7N1) |
| 94             | M1                   | H7N7    | UK          | E                   | 1927 | fowl             | L37796   | A/fowl/Dobson(H7N7)                         |
| 95             | M1                   | H7N7    | UK          | E                   | 1934 | chicken          | M23917   | A/chicken/FPV/Weybridge(H7N7)               |
| 96             | M1                   | H7N7    | UK          | E                   | 1927 | fowl             | M63526   | A/fowl/Dobson/1927(H7N7)                    |
| 97             | M1                   | H7N2    | USA         | NA                  | 2005 | chicken          | CY037016 | A/chicken/New York/63806-11/2005(H7N2)      |
| 98             | M1                   | H7N2    | USA         | NA                  | 2003 | chicken          | EU742996 | A/chicken/CT/260413-2/2003(H7N2)            |
| 99             | M1                   | H7N2    | USA         | NA                  | 2005 | chicken          | CY031644 | A/chicken/New York/22067-12/2005(H7N2)      |
| 100            | M1                   | H7N2    | USA         | NA                  | 2005 | chicken          | CY034247 | A/chicken/New York/19499/2005(H7N2)         |
| 101            | M1                   | H7N2    | USA         | NA                  | 1995 | guinea fowl      | AF073184 | A/Guinea Fowl/New York/13820-3/95 (H7N2NSB) |
| 102            | M1                   | H7N2    | USA         | NA                  | 1995 | chicken          | AF073185 | A/Chicken/New York/13833-7/95 (H7N2NSB)     |
| 103            | M1                   | H7N2    | USA         | NA                  | 1995 | chicken          | AF073186 | A/Chicken/New York/19542-5/95 (H7N2NSB)     |
| 104            | M1                   | H7N2    | USA         | NA                  | 1995 | chicken          | AF073187 | A/Chicken/New York/3112-1/95 (H7N2NSB)      |
| 105            | M1                   | H7N2    | USA         | NA                  | 1998 | chicken          | AF073195 | A/Chicken/Pennsylvania/13552-1/98 (H7N2NSB) |
| 106            | M1                   | H7N2    | USA         | NA                  | 1998 | Quail            | AF073196 | A/Quail/New York/13989-51/98 (H7N2NSA)      |
| 107            | M1                   | H7N3    | USA         | NA                  | 1971 | turkey           | AF073197 | A/turkey/Oregon/71(H7N3NSB)                 |
| 108            | M1                   | H7N3    | USA         | NA                  | 1991 | turkey           | AF073198 | A/Turkey/Colorado/13356/91 (H7N3NSA)        |
| 109            | M1                   | H7N3    | USA         | NA                  | 1998 | mallard          | DQ021717 | A/mallard/MN/284/98(H7N3)                   |
| 110            | M1                   | H7N3    | USA         | NA                  | 1980 | pheasant         | CY005889 | A/pheasant/Minnesota/917/1980(H7N3)         |
| 111            | M1                   | H7N2    | USA         | NA                  | 2000 | avian            | AY241589 | A/avian/NY/76247-3/00(H7N2)                 |
| 112            | M1                   | H7N2    | USA         | NA                  | 2001 | chicken          | AY241591 | A/Chicken/NJ/118555-2/01(H7N2)              |
| 113            | M1                   | H7N2    | USA         | NA                  | 2002 | chicken          | AY241596 | A/chicken/NJ/608/02(H7N2)                   |
| 114            | M1                   | H7N2    | USA         | NA                  | 1998 | chicken          | AY241597 | A/chicken/NJ/9777-7/98(H7N2)                |
| 115            | M1                   | H7N2    | USA         | NA                  | 2001 | chicken          | AY241598 | A/chicken/NY/119055-7/01(H7N2)              |
| 116            | M1                   | H7N2    | USA         | NA                  | 1998 | chicken          | AY241601 | A/chicken/NY/1387-8/98(H7N2)                |
| 117            | M1                   | H7N3    | USA         | NA                  | 1999 | chicken          | AY241602 | A/chicken/New York/14714-9/1999(H7N3)       |
| 118            | M1                   | H7N2    | USA         | NA                  | 1999 | chicken          | AY241604 | A/chicken/NY/21586-8/1999(H7N2)             |
| 119            | M1                   | H7N2    | USA         | NA                  | 1998 | guineafowl       | AY241618 | A/guineafowl/NJ/13246-9/98(H7N2)            |
| 120            | M1                   | H7N2    | USA         | NA                  | 1998 | quail            | AY241619 | A/quail/PA/20304/1998(H7N2)                 |
| 121            | M1                   | H7N2    | USA         | NA                  | 1998 | turkey           | AY241621 | A/turkey/NJ/9778-8/98(H7N2)                 |

| # <sup>1</sup> | Protein <sup>2</sup> | Subtype | country | Region <sup>3</sup> | Year | Animal            | GenBank  | Virus name                                         |
|----------------|----------------------|---------|---------|---------------------|------|-------------------|----------|----------------------------------------------------|
| 122            | M1                   | H7N2    | USA     | NA                  | 2005 | chicken           | CY034343 | A/chicken/New York/63806-12/2005(H7N2)             |
| 123            | M1                   | H7N2    | USA     | NA                  | 2005 | chicken           | CY031213 | A/chicken/New York/10196-6/2005(H7N2)              |
| 124            | M1                   | H7N3    | USA     | NA                  | 2006 | shorebird         | CY036768 | A/shorebird/Delaware Bay/560/2006(H7N3)            |
| 125            | M1                   | H7N2    | USA     | NA                  | 2005 | guinea fowl       | CY031221 | A/Guinea fowl/New York/10196-7/2005(H7N2)          |
| 126            | M1                   | H7N2    | USA     | NA                  | 1997 | chicken           | EU742962 | A/chicken/PA/19241/1997(H7N2)                      |
| 127            | M1                   | H7N3    | USA     | NA                  | 2008 | northern shoveler | CY039599 | A/northern shoveler/California/HKWF2031/2008(H7N3) |
| 128            | M1                   | H7N2    | USA     | NA                  | 2005 | quail             | CY033314 | A/quail/New York/63806-13/2005(H7N2)               |
| 129            | M1                   | H7N2    | USA     | NA                  | 2005 | guinea fowl       | CY031724 | A/Guinea fowl/New York/23165-12/2005(H7N2)         |
| 130            | M1                   | H7N3    | USA     | NA                  | 2007 | ruddy turnstone   | CY036776 | A/ruddy turnstone/Delaware Bay/108/2007(H7N3)      |
| 131            | M1                   | H7N2    | USA     | NA                  | 2005 | guinea fowl       | CY031652 | A/Guinea fowl/New York/22071/2005(H7N2)            |
| 132            | M1                   | H7N2    | USA     | NA                  | 2005 | chicken           | CY034367 | A/chicken/New York/88291-11/2005(H7N2)             |
| 133            | M1                   | H7N3    | USA     | NA                  | 2004 | blue winged teal  | CY018902 | A/blue-winged teal/Ohio/658/2004(H7N3)             |
| 134            | M1                   | H7N9    | USA     | NA                  | 1988 | turkey            | CY014787 | A/turkey/Minnesota/1/1988(H7N9)                    |
| 135            | M1                   | H7N7    | USA     | NA                  | 1999 | mallard           | DQ021697 | A/mallard/MN/17/99(H7N7)                           |
| 136            | M1                   | H7N9    | USA     | NA                  | 2006 | blue winged teal  | CY024819 | A/blue-winged teal/Ohio/566/2006(H7N9)             |
| 137            | M1                   | H7N2    | USA     | NA                  | 2000 | avian             | AY241590 | A/avian/NY/81746-5/00(H7N2)                        |
| 138            | M1                   | H7N2    | USA     | NA                  | 2001 | chicken           | AY241599 | A/chicken/NY/119256-7/2001(H7N2)                   |
| 139            | M1                   | H7N2    | USA     | NA                  | 2002 | chicken           | AY241609 | A/chicken/PA/149092-1/2002(H7N2)                   |
| 140            | M1                   | H7N2    | USA     | NA                  | 1997 | chicken           | AY241610 | A/chicken/PA/9701524/97(H7N2)                      |
| 141            | M1                   | H7N2    | USA     | NA                  | 1997 | chicken           | AY241611 | A/chicken/PA/9701530/97(H7N2)                      |
| 142            | M1                   | H7N2    | USA     | NA                  | 1998 | chicken           | AY241612 | A/chicken/PA/9800896/98(H7N2)                      |
| 143            | M1                   | H7N3    | USA     | NA                  | 2001 | blue winged teal  | AY300975 | A/blue-winged teal/TX/2/01(H7N3)                   |
| 144            | M1                   | H7N2    | USA     | NA                  | 1996 | chicken           | AF073190 | A/Chicken/New York/8030-2/96 (H7N2NSB)             |
| 145            | M1                   | H7N3    | USA     | NA                  | 1994 | Quail             | AF073200 | A/Quail/Arkansas/16309-7/94 (H7N3NSA)              |
| 146            | M1                   | H7N3    | USA     | NA                  | 1995 | turkey            | AF073201 | A/turkey/Utah/24721-10/95 (H7N3NSA)                |
| 147            | M1                   | H7N9    | USA     | NA                  | 2000 | ruddy turnstone   | DQ021735 | A/ruddy turnstone/DE/1538/2000(H7N9)               |
| 148            | M1                   | H7N9    | USA     | NA                  | 2000 | ruddy turnstone   | DQ021737 | A/ruddy turnstone/DE/629/00(H7N9)                  |
| 149            | M1                   | H7N3    | USA     | NA                  | 2005 | mallard           | CY021638 | A/mallard/Delaware/418/2005(H7N3)                  |
| 150            | M1                   | H7N8    | USA     | NA                  | 1987 | mallard           | CY021622 | A/mallard/Ohio/421/1987(H7N8)                      |
| 151            | M1                   | H7N3    | USA     | NA                  | 1998 | Mallard           | CY016189 | A/Mallard/Ohio/322/1998(H7N3)                      |
| 152            | M1                   | H7N2    | USA     | NA                  | 2005 | guinea fowl       | CY035923 | A/Guinea fowl/New York/88291-9/2005(H7N2)          |
| 153            | M1                   | H7N2    | USA     | NA                  | 2006 | chicken           | CY034903 | A/chicken/New York/19495-2/2006(H7N2)              |
| 154            | M1                   | H7N2    | USA     | NA                  | 2005 | turkey            | CY034895 | A/turkey/New York/122501-2/2005(H7N2)              |
| 155            | M1                   | H7N2    | USA     | NA                  | 2005 | chicken           | CY034799 | A/chicken/New York/88291-8/2005(H7N2)              |
| 156            | M1                   | H7N2    | USA     | NA                  | 1995 | emu               | EU980455 | A/emu/TX/25414/1995(H7N2)                          |
| 157            | M1                   | H7N2    | USA     | NA                  | 2005 | duck              | CY034807 | A/duck/New York/98616-4/2005(H7N2)                 |
| 158            | M1                   | H7N2    | USA     | NA                  | 2005 | guinea fowl       | CY034831 | A/Guinea fowl/New York/101276-1/2005(H7N2)         |
| 159            | M1                   | H7N2    | USA     | NA                  | 2006 | chicken           | CY036011 | A/chicken/New York/19499-1/2006(H7N2)              |
| 160            | M1                   | H7N3    | USA     | NA                  | 2006 | shorebird         | EU030971 | A/shorebird/Delaware/22/06(H7N3)                   |
| 161            | M1                   | H7N2    | USA     | NA                  | 2004 | chicken           | EU743254 | A/chicken/NJ/294508-12/2004(H7N2)                  |
| 162            | M1                   | H7N2    | USA     | NA                  | 2005 | chicken           | CY031636 | A/chicken/New York/22067-7/2005(H7N2)              |
| 163            | M1                   | H7N2    | USA     | NA                  | 2005 | guinea fowl       | CY031676 | A/Guinea fowl/New York/23164-3-05/2005(H7N2)       |
| 164            | M1                   | H7N2    | USA     | NA                  | 2005 | chicken           | CY031748 | A/chicken/New York/31621-9/2005(H7N2)              |
| 165            | M1                   | H7N7    | USA     | NA                  | 1989 | red knot          | CY005079 | A/red knot/NJ/325/1989(H7N7)                       |
| 166            | M1                   | H7N7    | USA     | NA                  | 1988 | ruddy turnstone   | CY005072 | A/ruddy turnstone/DE/2378/1988(H7N7)               |
| 167            | M1                   | H7N4    | USA     | NA                  | 2001 | blue winged teal  | DQ021687 | A/blue-winged teal/TX/11/01(H7N4)                  |
| 168            | M1                   | H7N2    | USA     | NA                  | 2001 | avian             | AY241588 | A/avian/NY/118353-1/2001(H7N2)                     |
| 169            | M1                   | H7N2    | USA     | NA                  | 2002 | chicken           | AY241593 | A/chicken/NJ/150383-7/02(H7N2)                     |
| 170            | M1                   | H7N2    | USA     | NA                  | 2000 | chicken           | AY241606 | A/chicken/NY/30749-3/2000(H7N2)                    |
| 171            | M1                   | H7N2    | USA     | NA                  | 2001 | chicken           | AY241608 | A/chicken/PA/143586/2001(H7N2)                     |
| 172            | M1                   | H7N2    | USA     | NA                  | 2002 | chicken           | AY241614 | A/chicken/VA/32/02(H7N2)                           |
| 173            | M1                   | H7N3    | USA     | NA                  | 2001 | Duck              | AY241616 | A/Duck/PA/143585/01(H7N3)                          |
| 174            | M1                   | H7N3    | USA     | NA                  | 1999 | pintail           | DQ021732 | A/pintail/MN/423/99(H7N3)                          |
| 175            | M1                   | H7N3    | USA     | NA                  | 1994 | chicken           | AF073180 | A/chicken/New Jersey/15086-3/1994(H7N3)NSA)        |
| 176            | M1                   | H7N2    | USA     | NA                  | 1994 | chicken           | AF073182 | A/Chicken/New York/4447-7/94 (H7N2NSA)             |
| 177            | M1                   | H7N2    | USA     | NA                  | 1996 | chicken           | AF073189 | A/Chicken/New York/3202-7/96 (H7N2NSB)             |
| 178            | M1                   | H7N2    | USA     | NA                  | 1996 | guinea fowl       | AF073191 | A/Guinea Fowl/Pennsylvania/7777-1/96 (H7N2NSB)     |
| 179            | M1                   | H7N2    | USA     | NA                  | 1997 | chicken           | AF073193 | A/Chicken/New York/6777-3/97 (H7N2NSB)             |
| 180            | M1                   | H7N2    | USA     | NA                  | 2005 | chukar            | CY022766 | A/chukar/New York/11653-1/2005(H7N2)               |
| 181            | M1                   | H7N2    | USA     | NA                  | 2006 | chicken           | CY028581 | A/chicken/New York/8391-2/2006(H7N2)               |
| 182            | M1                   | H7N3    | USA     | NA                  | 1971 | turkey            | DQ870897 | A/turkey/Oregon/1971(H7N3)                         |
| 183            | M1                   | H7N3    | USA     | NA                  | 2008 | green winged teal | CY039543 | A/green winged teal/California/AKS1370/2008(H7N3)  |
| 184            | M1                   | H7N2    | USA     | NA                  | 2001 | chicken           | EU742889 | A/chicken/FL/90348-4/2001 (H7N2)                   |
| 185            | M1                   | H7N2    | USA     | NA                  | 2005 | quail             | CY034391 | A/quail/New York/89641/2005(H7N2)                  |
| 186            | M1                   | H7N3    | USA     | NA                  | 2006 | ruddy turnstone   | CY037104 | A/ruddy turnstone/Delaware Bay/283/2006(H7N3)      |
| 187            | M1                   | H7N7    | USA     | NA                  | 2007 | mallard           | CY033383 | A/mallard/California/HKWF1971/2007(H7N7)           |
| 188            | M1                   | H7N2    | USA     | NA                  | 2005 | chicken           | CY031077 | A/chicken/New York/23165-6/2005(H7N2)              |
| 189            | M1                   | H7N2    | USA     | NA                  | 2005 | chukar            | CY024843 | A/chukar/New York/21211-7/2005(H7N2)               |
| 190            | M1                   | H7N3    | USA     | NA                  | 1998 | mallard           | DQ021701 | A/mallard/MN/187/98(H7N3)                          |

| # <sup>1</sup> | Protein <sup>2</sup> | Subtype | country | Region <sup>3</sup> | Year | Animal            | GenBank  | Virus name                                         |
|----------------|----------------------|---------|---------|---------------------|------|-------------------|----------|----------------------------------------------------|
| 191            | M1                   | H7N3    | USA     | NA                  | 1998 | mallard           | DQ021702 | A/mallard/MN/190/98(H7N3)                          |
| 192            | M1                   | H7N3    | USA     | NA                  | 1998 | mallard           | DQ021728 | A/mallard/MN/88/98(H7N3)                           |
| 193            | M1                   | H7N2    | USA     | NA                  | 2005 | chicken           | CY022814 | A/chicken/New York/16326-5/2005(H7N2)              |
| 194            | M1                   | H7N2    | USA     | NA                  | 2005 | chicken           | CY022830 | A/chicken/New York/21211-2/2005(H7N2)              |
| 195            | M1                   | H7N2    | USA     | NA                  | 1994 | chicken           | AF073181 | A/Chicken/New York/13142-5/94 (H7N2NSB)            |
| 196            | M1                   | H7N2    | USA     | NA                  | 1994 | turkey            | AF073183 | A/Turkey/New York/4450-5/94 (H7N2NSB)              |
| 197            | M1                   | H7N2    | USA     | NA                  | 1995 | chicken           | AF073188 | A/Chicken/Rhode Island/4328/95 (H7N2NSB)           |
| 198            | M1                   | H7N2    | USA     | NA                  | 1997 | chicken           | AF073192 | A/Chicken/Pennsylvania/11767-1/97 (H7N2NSB)        |
| 199            | M1                   | H7N2    | USA     | NA                  | 1997 | turkey            | AF073194 | A/Turkey/Pennsylvania/7975/97 (H7N2NSB)            |
| 200            | M1                   | H7N1    | USA     | NA                  | 1993 | rhea              | AF073199 | A/rhea/North Carolina/39482/93 (H7N1NSA)           |
| 201            | M1                   | H7N3    | USA     | NA                  | 2000 | laughing gull     | DQ021689 | A/laughing gull/NY/2455/00(H7N3)                   |
| 202            | M1                   | H7N2    | USA     | NA                  | 2001 | chicken           | AY241592 | A/chicken/NJ/118878-5/2001(H7N2)                   |
| 203            | M1                   | H7N2    | USA     | NA                  | 2002 | chicken           | AY241594 | A/chicken/NJ/151244-18/02(H7N2)                    |
| 204            | M1                   | H7N3    | USA     | NA                  | 1999 | chicken           | AY241600 | A/chicken/New York/12273-11/1999(H7N3)             |
| 205            | M1                   | H7N2    | USA     | NA                  | 1999 | chicken           | AY241605 | A/chicken/NY/22409-4/99(H7N2)                      |
| 206            | M1                   | H7N2    | USA     | NA                  | 1998 | chicken           | AY241607 | A/chicken/NY/6031-19/1998(H7N2)                    |
| 207            | M1                   | H7N3    | USA     | NA                  | 2001 | Duck              | AY241615 | A/Duck/NJ/117228-7/01(H7N3)                        |
| 208            | M1                   | H7N2    | USA     | NA                  | 2002 | guineafowl        | AY241617 | A/guineafowl/MA/148081-11/02(H7N2)                 |
| 209            | M1                   | H7N3    | USA     | NA                  | 1999 | chicken           | EU182302 | A/Chicken/NY/14714-2/1999(H7N3)                    |
| 210            | M1                   | H7N2    | USA     | NA                  | 1998 | goose             | EU743266 | A/goose/NY/8600-3/1998(H7N2)                       |
| 211            | M1                   | H7N3    | USA     | NA                  | 2001 | black duck        | CY020886 | A/Black Duck/Ohio/415/2001(H7N3)                   |
| 212            | M1                   | H7N3    | USA     | NA                  | 2006 | laughing gull     | EU030987 | A/laughing gull/Delaware/42/06(H7N3)               |
| 213            | M1                   | H7N3    | USA     | NA                  | 1985 | ruddy turnstone   | CY004406 | A/ruddy turnstone/New Jersey/65/1985(H7N3)         |
| 214            | M1                   | H7N3    | USA     | NA                  | 1980 | turkey            | CY014779 | A/turkey/Minnesota/1200/1980(H7N3)                 |
| 215            | M1                   | H7N2    | USA     | NA                  | 2006 | guinea fowl       | CY034239 | A/Guinea fowl/New York/32084/2006(H7N2)            |
| 216            | M1                   | H7N3    | USA     | NA                  | 2007 | northern shoveler | CY039583 | A/northern shoveler/California/HKWF1026/2007(H7N3) |
| 217            | M1                   | H7N2    | USA     | NA                  | 2005 | chicken           | CY034839 | A/chicken/New York/10508/2005(H7N2)                |
| 218            | M1                   | H7N2    | USA     | NA                  | 2005 | muscovy duck      | CY034847 | A/Muscovy duck/New York/11646-4/2005(H7N2)         |
| 219            | M1                   | H7N2    | USA     | NA                  | 2005 | muscovy duck      | CY034791 | A/Muscovy duck/New York/87493-3/2005(H7N2)         |
| 220            | M1                   | H7N2    | USA     | NA                  | 2005 | guinea fowl       | CY028508 | A/Guinea fowl/New York/143646-3/2005(H7N2)         |
| 221            | M1                   | H7N2    | USA     | NA                  | 2005 | chicken           | CY031117 | A/chicken/New York/30732-6/2005(H7N2)              |
| 222            | M1                   | H7N3    | USA     | NA                  | 2006 | laughing gull     | CY037088 | A/laughing gull/Delaware Bay/46/2006(H7N3)         |
| 1              | NA                   | H7N1    | Canada  | NA                  | 2000 | turkey            | AY261521 | A/turkey/Ontario/HR2/2000(H7N1)                    |
| 2              | NA                   | H7N1    | Canada  | NA                  | 2001 | mallard           | CY005094 | A/mallard/Alberta/34/2001(H7N1)                    |
| 3              | NA                   | H7N1    | China   | E                   | 1992 | duck              | AY207527 | A/duck/Nanchang/1944/92(H7N1)                      |
| 4              | NA                   | H7N1    | China   | E                   | 1992 | duck              | CY005495 | A/duck/Nanchang/1904/1992(H7N1)                    |
| 5              | NA                   | H7N1    | France  | E                   | 2001 | mallard           | AM157357 | A/mallard/France/2526/2001(H7N1)                   |
| 6              | NA                   | H7N1    | France  | E                   | 2001 | mallard           | AM157356 | A/mallard/France/2525/2001(H7N1)                   |
| 7              | NA                   | H7N1    | France  | E                   | 2001 | mallard           | AJ697874 | A/mallard/France/2526/2001(H7N1)                   |
| 8              | NA                   | H7N1    | France  | E                   | 2001 | mallard           | AJ697875 | A/mallard/France/2525/2001(H7N1)                   |
| 9              | NA                   | H7N1    | Germany | E                   | 1934 | chicken           | CY015048 | A/chicken/Rostock/45/1934(H7N1)                    |
| 10             | NA                   | H7N1    | Germany | E                   | 1934 | chicken           | X52226   | A/chicken/Rostock/8/1934(H7N1)                     |
| 11             | NA                   | H7N1    | Ireland | E                   | 1973 | parrot            | K02252   | A/parrot/Ulster/73(H7N1)                           |
| 12             | NA                   | H7N1    | Italy   | E                   | 2000 | duck              | CY021559 | A/duck/Italy/551/2000(H7N1)                        |
| 13             | NA                   | H7N1    | Italy   | E                   | 2000 | guinea fowl       | CY022663 | A/guinea fowl/Italy/155/2000(H7N1)                 |
| 14             | NA                   | H7N1    | Italy   | E                   | 2001 | turkey            | CY021423 | A/turkey/Italy/1351/2001(H7N1)                     |
| 15             | NA                   | H7N1    | Italy   | E                   | 2000 | pekin duck        | CY024900 | A/pekin duck/Italy/1848/2000(H7N1)                 |
| 16             | NA                   | H7N1    | Italy   | E                   | 1999 | turkey            | CY025151 | A/turkey/Italy/4301/1999(H7N1)                     |
| 17             | NA                   | H7N1    | Italy   | E                   | 1999 | turkey            | CY025183 | A/turkey/Italy/2732/1999(H7N1)                     |
| 18             | NA                   | H7N1    | Italy   | E                   | 1999 | chicken           | AJ416627 | A/Chicken/Italy/1067/99(H7N1)                      |
| 19             | NA                   | H7N1    | Italy   | E                   | 1999 | turkey            | AJ416628 | A/turkey/Italy/4580/1999(H7N1)                     |
| 20             | NA                   | H7N1    | Italy   | E                   | 1999 | turkey            | CY024884 | A/turkey/Italy/3185/1999(H7N1)                     |
| 21             | NA                   | H7N1    | Italy   | E                   | 2000 | turkey            | CY021543 | A/turkey/Italy/4426/2000(H7N1)                     |
| 22             | NA                   | H7N1    | Italy   | E                   | 2000 | quail             | CY022671 | A/quail/Italy/396/2000(H7N1)                       |
| 23             | NA                   | H7N1    | Italy   | E                   | 2001 | chicken           | CY021551 | A/chicken/Italy/322/2001(H7N1)                     |
| 24             | NA                   | H7N1    | Italy   | E                   | 1999 | turkey            | CY005785 | A/turkey/Italy/3620/1999(H7N1)                     |
| 25             | NA                   | H7N1    | Italy   | E                   | 1999 | quail             | CY025119 | A/quail/Italy/4992/1999(H7N1)                      |
| 26             | NA                   | H7N1    | Italy   | E                   | 1999 | turkey            | CY025159 | A/turkey/Italy/3489/1999(H7N1)                     |
| 27             | NA                   | H7N1    | Italy   | E                   | 1999 | turkey            | CY025175 | A/turkey/Italy/2715/1999(H7N1)                     |
| 28             | NA                   | H7N1    | Italy   | E                   | 2000 | ostrich           | DQ991306 | A/ostrich/Italy/2332/00(H7N1)                      |
| 29             | NA                   | H7N1    | Italy   | E                   | 1999 | turkey            | CY021415 | A/turkey/Italy/3675/1999(H7N1)                     |
| 30             | NA                   | H7N1    | Italy   | E                   | 2000 | chicken           | CY024764 | A/chicken/Italy/2335/2000(H7N1)                    |
| 31             | NA                   | H7N1    | Italy   | E                   | 2000 | turkey            | CY024772 | A/turkey/Italy/1084/2000(H7N1)                     |
| 32             | NA                   | H7N1    | Italy   | E                   | 2000 | turkey            | CY021535 | A/turkey/Italy/2984/2000(H7N1)                     |
| 33             | NA                   | H7N1    | Italy   | E                   | 1999 | chicken           | DQ991330 | A/chicken/Italy/5093/99(H7N1)                      |
| 34             | NA                   | H7N1    | Italy   | E                   | 2000 | ostrich           | DQ991314 | A/ostrich/Italy/2332/00(H7N1)                      |
| 35             | NA                   | H7N1    | Italy   | E                   | 1999 | turkey            | CY025167 | A/turkey/Italy/3560/1999(H7N1)                     |
| 36             | NA                   | H7N1    | Italy   | E                   | 1999 | turkey            | CY024860 | A/turkey/Italy/4708/1999(H7N1)                     |
| 37             | NA                   | H7N1    | Italy   | E                   | 1999 | turkey            | CY005790 | A/turkey/Italy/4169/1999(H7N1)                     |
| 38             | NA                   | H7N1    | Italy   | E                   | 1999 | turkey            | CY024868 | A/turkey/Italy/4482/1999(H7N1)                     |
| 39             | NA                   | H7N1    | Italy   | E                   | 1999 | turkey            | CY025191 | A/turkey/Italy/1265/1999(H7N1)                     |

| # <sup>1</sup> | Protein <sup>2</sup> | Subtype | country      | Region <sup>3</sup> | Year | Animal           | GenBank  | Virus name                                   |
|----------------|----------------------|---------|--------------|---------------------|------|------------------|----------|----------------------------------------------|
| 40             | NA                   | H7N1    | Italy        | E                   | 2000 | chicken          | CY015016 | A/chicken/Italy/1285/2000(H7N1)              |
| 41             | NA                   | H7N1    | Italy        | E                   | 2000 | ostrich          | DQ991337 | A/ostrich/Italy/984/00(H7N1)                 |
| 42             | NA                   | H7N1    | Italy        | E                   | 2002 | mallard          | EU158122 | A/mallard/Italy/250/02(H7N1)                 |
| 43             | NA                   | H7N1    | Italy        | E                   | 1999 | chicken          | CY022679 | A/chicken/Italy/1082/99(H7N1)                |
| 44             | NA                   | H7N1    | Japan        | E                   | 2003 | duck             | AB451873 | A/duck/Hokkaido/143/2003(H7N1)               |
| 45             | NA                   | H7N1    | Mongolia     | E                   | 2002 | duck             | AB473545 | A/duck/Mongolia/867/2002(H7N1)               |
| 46             | NA                   | H7N1    | Mongolia     | E                   | 2001 | duck             | AB302788 | A/duck/Mongolia/47/2001(H7N1)                |
| 47             | NA                   | H7N1    | South Africa | E                   | 1992 | softbill         | AY207538 | A/softbill/South Africa/142/92(H7N1)         |
| 48             | NA                   | H7N1    | UK           | E                   | 1979 | African starling | AJ416629 | A/African starling/England/983/79(H7N1)      |
| 49             | NA                   | H7N1    | USA          | NA                  | 1993 | rhea             | EF607926 | A/rhea/North Carolina/39482/1993(H7N1)       |
| 50             | NA                   | H7N2    | Australia    | A                   | 2007 | duck             | CY033163 | A/duck/Tasmania/277/2007(H7N2)               |
| 51             | NA                   | H7N2    | China        | E                   | 2002 | chicken          | AY724264 | A/chicken/Hebei/1/2002(H7N2)                 |
| 52             | NA                   | H7N2    | Hong Kong    | E                   | 1978 | duck             | AB302790 | A/duck/Hong Kong/301/1978(H7N2)              |
| 53             | NA                   | H7N2    | Hong Kong    | E                   | 1978 | duck             | CY005620 | A/duck/Hong Kong/293/1978(H7N2)              |
| 54             | NA                   | H7N2    | Italy        | E                   | 2003 | quail            | CY021511 | A/quail/Italy/4610/2003(H7N2)                |
| 55             | NA                   | H7N2    | Italy        | E                   | 2003 | duck             | CY031030 | A/duck/Italy/4609/2003(H7N2)                 |
| 56             | NA                   | H7N2    | UK           | E                   | 2007 | chicken          | EF675617 | A/chicken/Wales/1306/2007(H7N2)              |
| 57             | NA                   | H7N2    | USA          | NA                  | 2005 | duck             | CY037041 | A/duck/New York/88291-12/2005(H7N2)          |
| 58             | NA                   | H7N2    | USA          | NA                  | 2005 | chicken          | CY034840 | A/chicken/New York/10508/2005(H7N2)          |
| 59             | NA                   | H7N2    | USA          | NA                  | 2005 | duck             | CY034808 | A/duck/New York/98616-4/2005(H7N2)           |
| 60             | NA                   | H7N2    | USA          | NA                  | 2006 | chicken          | CY036012 | A/chicken/New York/19499-1/2006(H7N2)        |
| 61             | NA                   | H7N2    | USA          | NA                  | 2005 | chicken          | CY035980 | A/chicken/New York/122501-1/2005(H7N2)       |
| 62             | NA                   | H7N2    | USA          | NA                  | 2005 | turkey           | CY034896 | A/turkey/New York/122501-2/2005(H7N2)        |
| 63             | NA                   | H7N2    | USA          | NA                  | 2005 | guinea fowl      | CY035956 | A/Guinea fowl/New York/11646-3/2005(H7N2)    |
| 64             | NA                   | H7N2    | USA          | NA                  | 2005 | muscovy duck     | CY034848 | A/Muscovy duck/New York/11646-4/2005(H7N2)   |
| 65             | NA                   | H7N2    | USA          | NA                  | 2005 | chicken          | CY034800 | A/chicken/New York/88291-8/2005(H7N2)        |
| 66             | NA                   | H7N2    | USA          | NA                  | 2005 | quail            | CY033315 | A/quail/New York/63806-13/2005(H7N2)         |
| 67             | NA                   | H7N2    | USA          | NA                  | 2005 | duck             | CY034816 | A/duck/New York/98616-5/2005(H7N2)           |
| 68             | NA                   | H7N2    | USA          | NA                  | 2005 | muscovy duck     | CY034792 | A/Muscovy duck/New York/87493-3/2005(H7N2)   |
| 69             | NA                   | H7N2    | USA          | NA                  | 2006 | chicken          | CY035988 | A/chicken/New York/19495-4/2006(H7N2)        |
| 70             | NA                   | H7N2    | USA          | NA                  | 2005 | chicken          | CY037017 | A/chicken/New York/63806-11/2005(H7N2)       |
| 71             | NA                   | H7N2    | USA          | NA                  | 2005 | guinea fowl      | CY037065 | A/Guinea fowl/New York/98616-3/2005(H7N2)    |
| 72             | NA                   | H7N2    | USA          | NA                  | 2006 | chicken          | CY034904 | A/chicken/New York/19495-2/2006(H7N2)        |
| 73             | NA                   | H7N2    | USA          | NA                  | 2005 | guinea fowl      | CY034832 | A/Guinea fowl/New York/101276-1/2005(H7N2)   |
| 74             | NA                   | H7N2    | USA          | NA                  | 2005 | chicken          | CY035948 | A/chicken/New York/11646-2/2005(H7N2)        |
| 75             | NA                   | H7N2    | USA          | NA                  | 2005 | chicken          | CY031773 | A/chicken/New York/42217/2005(H7N2)          |
| 76             | NA                   | H7N2    | USA          | NA                  | 2005 | chicken          | CY031637 | A/chicken/New York/22067-7/2005(H7N2)        |
| 77             | NA                   | H7N2    | USA          | NA                  | 2005 | guinea fowl      | CY031677 | A/Guinea fowl/New York/23164-3-05/2005(H7N2) |
| 78             | NA                   | H7N2    | USA          | NA                  | 2005 | duck             | CY034376 | A/duck/New York/88291-13/2005(H7N2)          |
| 79             | NA                   | H7N2    | USA          | NA                  | 2005 | chicken          | CY034344 | A/chicken/New York/63806-12/2005(H7N2)       |
| 80             | NA                   | H7N2    | USA          | NA                  | 2006 | guinea fowl      | CY034240 | A/Guinea fowl/New York/32084/2006(H7N2)      |
| 81             | NA                   | H7N2    | USA          | NA                  | 2000 | avian            | AY254106 | A/avian/NY/76247-3/00(H7N2)                  |
| 82             | NA                   | H7N2    | USA          | NA                  | 2001 | chicken          | AY254116 | A/chicken/NY/119256-7/2001(H7N2)             |
| 83             | NA                   | H7N2    | USA          | NA                  | 1998 | chicken          | AY254118 | A/chicken/NY/1387-8/98(H7N2)                 |
| 84             | NA                   | H7N2    | USA          | NA                  | 2000 | chicken          | AY254123 | A/chicken/NY/30749-3/2000(H7N2)              |
| 85             | NA                   | H7N2    | USA          | NA                  | 1996 | chicken          | AY254125 | A/Chicken/New York/3202-7/96 (H7N2)          |
| 86             | NA                   | H7N2    | USA          | NA                  | 1998 | chicken          | AY254127 | A/chicken/NY/6031-19/1998(H7N2)              |
| 87             | NA                   | H7N2    | USA          | NA                  | 1997 | chicken          | AY254131 | A/chicken/PA/9701524/97(H7N2)                |
| 88             | NA                   | H7N2    | USA          | NA                  | 1998 | guineafowl       | AY254138 | A/guineafowl/NJ/13246-9/98(H7N2)             |
| 89             | NA                   | H7N2    | USA          | NA                  | 1998 | turkey           | AY254143 | A/turkey/NJ/9778-8/98(H7N2)                  |
| 90             | NA                   | H7N2    | USA          | NA                  | 2002 | turkey           | AY254146 | A/turkey/VA/55/2002(H7N2)                    |
| 91             | NA                   | H7N2    | USA          | NA                  | 2002 | turkey           | AY254148 | A/turkey/VA/67/02(H7N2)                      |
| 92             | NA                   | H7N2    | USA          | NA                  | 2005 | chicken          | CY022815 | A/chicken/New York/16326-5/2005(H7N2)        |
| 93             | NA                   | H7N2    | USA          | NA                  | 2006 | guinea fowl      | CY028574 | A/Guinea fowl/New York/8391-1/2006(H7N2)     |
| 94             | NA                   | H7N2    | USA          | NA                  | 2006 | chicken          | CY028582 | A/chicken/New York/8391-2/2006(H7N2)         |
| 95             | NA                   | H7N2    | USA          | NA                  | 2003 | chicken          | EU742997 | A/chicken/CT/260413-2/2003(H7N2)             |
| 96             | NA                   | H7N2    | USA          | NA                  | 2005 | guinea fowl      | CY031725 | A/Guinea fowl/New York/23165-12/2005(H7N2)   |
| 97             | NA                   | H7N2    | USA          | NA                  | 2005 | chicken          | CY031214 | A/chicken/New York/10196-6/2005(H7N2)        |
| 98             | NA                   | H7N2    | USA          | NA                  | 2005 | chicken          | CY031078 | A/chicken/New York/23165-6/2005(H7N2)        |
| 99             | NA                   | H7N2    | USA          | NA                  | 1997 | chicken          | EU742963 | A/chicken/PA/19241/1997(H7N2)                |
| 100            | NA                   | H7N2    | USA          | NA                  | 2001 | chicken          | EU742890 | A/chicken/FL/90348-4/2001(H7N2)              |
| 101            | NA                   | H7N2    | USA          | NA                  | 2005 | chicken          | CY034368 | A/chicken/New York/88291-11/2005(H7N2)       |
| 102            | NA                   | H7N2    | USA          | NA                  | 2005 | guinea fowl      | CY028509 | A/Guinea fowl/New York/143646-3/2005(H7N2)   |
| 103            | NA                   | H7N2    | USA          | NA                  | 2005 | chukar           | CY031070 | A/chukar/New York/23164-13/2005(H7N2)        |
| 104            | NA                   | H7N2    | USA          | NA                  | 2005 | chicken          | CY031118 | A/chicken/New York/30732-6/2005(H7N2)        |
| 105            | NA                   | H7N2    | USA          | NA                  | 2005 | chicken          | CY034304 | A/chicken/New York/23165-10/2005(H7N2)       |
| 106            | NA                   | H7N2    | USA          | NA                  | 1998 | goose            | EU743267 | A/goose/NY/8600-3/1998(H7N2)                 |
| 107            | NA                   | H7N2    | USA          | NA                  | 2005 | guinea fowl      | CY031653 | A/Guinea fowl/New York/22071/2005(H7N2)      |
| 108            | NA                   | H7N2    | USA          | NA                  | 2005 | muscovy duck     | CY031709 | A/Muscovy duck/New York/23164-10/2005(H7N2)  |
| 109            | NA                   | H7N2    | USA          | NA                  | 2005 | chicken          | CY034192 | A/chicken/New York/143646-2/2005(H7N2)       |
| 110            | NA                   | H7N2    | USA          | NA                  | 2004 | chicken          | AY831673 | A/chicken/MD/MINH MA/2004(H7N2)              |
| 111            | NA                   | H7N2    | USA          | NA                  | 2001 | avian            | AY254105 | A/avian/NY/118353-1/2001(H7N2)               |

| # <sup>1</sup> | Protein <sup>2</sup> | Subtype | country   | Region <sup>3</sup> | Year | Animal              | GenBank  | Virus name                                      |
|----------------|----------------------|---------|-----------|---------------------|------|---------------------|----------|-------------------------------------------------|
| 112            | NA                   | H7N2    | USA       | NA                  | 2001 | chicken             | AY254109 | A/chicken/NJ/118878-5/2001(H7N2)                |
| 113            | NA                   | H7N2    | USA       | NA                  | 2002 | chicken             | AY254110 | A/chicken/NJ/150383-7/02(H7N2)                  |
| 114            | NA                   | H7N2    | USA       | NA                  | 2001 | chicken             | AY254115 | A/chicken/NY/119055-7/01(H7N2)                  |
| 115            | NA                   | H7N2    | USA       | NA                  | 2001 | chicken             | AY254130 | A/chicken/PA/143586/2001(H7N2)                  |
| 116            | NA                   | H7N2    | USA       | NA                  | 1997 | chicken             | AY254132 | A/chicken/PA/9701527/97(H7N2)                   |
| 117            | NA                   | H7N2    | USA       | NA                  | 2002 | guineafowl          | AY254137 | A/guineafowl/MA/148081/02(H7N2)                 |
| 118            | NA                   | H7N2    | USA       | NA                  | 1998 | quail               | AY254140 | A/quail/NY/13989/98(H7N2)                       |
| 119            | NA                   | H7N2    | USA       | NA                  | 2005 | chukar              | CY024844 | A/chukar/New York/21211-7/2005(H7N2)            |
| 120            | NA                   | H7N2    | USA       | NA                  | 2005 | chicken             | CY034360 | A/chicken/New York/88291-6/2005(H7N2)           |
| 121            | NA                   | H7N2    | USA       | NA                  | 2006 | chicken             | CY028542 | A/chicken/New York/3181-5/2006(H7N2)            |
| 122            | NA                   | H7N2    | USA       | NA                  | 2000 | avian               | AY254107 | A/avian/NY/81746-5/00(H7N2)                     |
| 123            | NA                   | H7N2    | USA       | NA                  | 2001 | chicken             | AY254108 | A/Chicken/NJ/118555-2/01(H7N2)                  |
| 124            | NA                   | H7N2    | USA       | NA                  | 1999 | chicken             | AY254119 | A/chicken/NY/14858-12/1999(H7N2)                |
| 125            | NA                   | H7N2    | USA       | NA                  | 1997 | chicken             | AY254128 | A/Chicken/New York/6777-3/97(H7N2)              |
| 126            | NA                   | H7N2    | USA       | NA                  | 1998 | chicken             | AY254129 | A/Chicken/Pennsylvania/13552-1/98 (H7N2)        |
| 127            | NA                   | H7N2    | USA       | NA                  | 2002 | turkey              | AY254142 | A/turkey/NC/11165/02(H7N2)                      |
| 128            | NA                   | H7N2    | USA       | NA                  | 1997 | turkey              | AY254145 | A/turkey/PA/7975/1997(H7N2)                     |
| 129            | NA                   | H7N2    | USA       | NA                  | 2005 | chicken             | CY031701 | A/chicken/New York/23164-9/2005(H7N2)           |
| 130            | NA                   | H7N2    | USA       | NA                  | 2005 | chicken             | CY029835 | A/chicken/New York/16326-4/2005(H7N2)           |
| 131            | NA                   | H7N2    | USA       | NA                  | 1997 | chicken             | EU742928 | A/chicken/PA/7777-1/1997(H7N2)                  |
| 132            | NA                   | H7N2    | USA       | NA                  | 1997 | chicken             | EU742943 | A/chicken/PA/11767/1997(H7N2)                   |
| 133            | NA                   | H7N2    | USA       | NA                  | 2001 | guinea fowl         | EU742914 | A/guinea fowl/NJ/119063-8/2001(H7N2)            |
| 134            | NA                   | H7N2    | USA       | NA                  | 2005 | chicken             | CY031749 | A/chicken/New York/31621-9/2005(H7N2)           |
| 135            | NA                   | H7N2    | USA       | NA                  | 2005 | guinea fowl         | CY031765 | A/Guinea fowl/New York/37982-3/2005(H7N2)       |
| 136            | NA                   | H7N2    | USA       | NA                  | 2005 | muscovy duck        | CY033227 | A/Muscovy duck/New York/23165-13/2005(H7N2)     |
| 137            | NA                   | H7N2    | USA       | NA                  | 2005 | chicken             | CY022831 | A/chicken/New York/21211-2/2005(H7N2)           |
| 138            | NA                   | H7N2    | USA       | NA                  | 2005 | chicken             | CY022823 | A/chicken/New York/16330/2005(H7N2)             |
| 139            | NA                   | H7N2    | USA       | NA                  | 2005 | chicken             | CY034248 | A/chicken/New York/19499/2005(H7N2)             |
| 140            | NA                   | H7N2    | USA       | NA                  | 2006 | guinea fowl         | CY028598 | A/Guinea fowl/New York/19501-4/2006(H7N2)       |
| 141            | NA                   | H7N2    | USA       | NA                  | 2006 | chicken             | CY028630 | A/chicken/New York/29047-4/2006(H7N2)           |
| 142            | NA                   | H7N2    | USA       | NA                  | 2005 | quail               | CY034392 | A/quail/New York/89641/2005(H7N2)               |
| 143            | NA                   | H7N2    | USA       | NA                  | 2005 | chicken             | CY033299 | A/chicken/New York/37982-4/2005(H7N2)           |
| 144            | NA                   | H7N2    | USA       | NA                  | 2005 | chicken             | CY033307 | A/chicken/New York/63806-8/2005(H7N2)           |
| 145            | NA                   | H7N2    | USA       | NA                  | 2005 | chicken             | CY033259 | A/chicken/New York/30732-11/2005(H7N2)          |
| 146            | NA                   | H7N2    | USA       | NA                  | 2005 | chicken             | CY033203 | A/chicken/New York/22067-8/2005(H7N2)           |
| 147            | NA                   | H7N2    | USA       | NA                  | 2004 | chicken             | EU743255 | A/chicken/NJ/294508-12/2004(H7N2)               |
| 148            | NA                   | H7N2    | USA       | NA                  | 2002 | chicken             | EU742969 | A/chicken/PA/149092-1/2002(H7N2)                |
| 149            | NA                   | H7N2    | USA       | NA                  | 2005 | chukar              | CY022767 | A/chukar/New York/11653-1/2005(H7N2)            |
| 150            | NA                   | H7N2    | USA       | NA                  | 2004 | chicken             | AY831671 | A/chicken/DE/HOBO/2004(H7N2)                    |
| 151            | NA                   | H7N2    | USA       | NA                  | 2004 | chicken             | AY831672 | A/chicken/DE/VIV A/2004(H7N2)                   |
| 152            | NA                   | H7N2    | USA       | NA                  | 2002 | chicken             | AY254111 | A/chicken/NJ/151244-18/02(H7N2)                 |
| 153            | NA                   | H7N2    | USA       | NA                  | 1999 | chicken             | AY254112 | A/chicken/NJ/16224-6/1999(H7N2)                 |
| 154            | NA                   | H7N2    | USA       | NA                  | 2000 | chicken             | AY254113 | A/Chicken/New Jersey/30739-6/00(H7N2)           |
| 155            | NA                   | H7N2    | USA       | NA                  | 1998 | chicken             | AY254114 | A/chicken/NJ/9777-7/98(H7N2)                    |
| 156            | NA                   | H7N2    | USA       | NA                  | 1999 | chicken             | AY254121 | A/chicken/NY/21586-8/1999(H7N2)                 |
| 157            | NA                   | H7N2    | USA       | NA                  | 1999 | chicken             | AY254122 | A/chicken/NY/22409-4/99(H7N2)                   |
| 158            | NA                   | H7N2    | USA       | NA                  | 1997 | chicken             | AY254133 | A/chicken/PA/9701530/97(H7N2)                   |
| 159            | NA                   | H7N2    | USA       | NA                  | 1998 | chicken             | AY254134 | A/chicken/PA/9800896/98(H7N2)                   |
| 160            | NA                   | H7N2    | USA       | NA                  | 1998 | chicken             | AY254135 | A/chicken/PA/9801289/98(H7N2)                   |
| 161            | NA                   | H7N2    | USA       | NA                  | 2002 | chicken             | AY254136 | A/chicken/VA/32/02(H7N2)                        |
| 162            | NA                   | H7N2    | USA       | NA                  | 1995 | chicken             | EU742952 | A/chicken/NY/13833-7/1995(H7N2)                 |
| 163            | NA                   | H7N2    | USA       | NA                  | 1995 | guinea fowl         | CY014838 | A/guinea fowl/New York/13820-3/1995(H7N2)       |
| 164            | NA                   | H7N2    | USA       | NA                  | 1994 | chicken             | AY254117 | A/Chicken/New York/13142-5/94 (H7N2)            |
| 165            | NA                   | H7N2    | USA       | NA                  | 1995 | chicken             | AY254124 | A/Chicken/New York/3112-1/95 (H7N2)             |
| 166            | NA                   | H7N2    | USA       | NA                  | 1994 | chicken             | AY254126 | A/Chicken/New York/4447-7/94 (H7N2)             |
| 167            | NA                   | H7N2    | USA       | NA                  | 1997 | guineafowl          | AY254139 | A/guineafowl/New York/13820-3/97(H7N2)          |
| 168            | NA                   | H7N2    | USA       | NA                  | 1995 | chicken             | EU742938 | A/chicken/RI/4328-1/1995(H7N2)                  |
| 169            | NA                   | H7N2    | USA       | NA                  | 1997 | chicken             | EU742933 | A/chicken/NY/8030-2/1997(H7N2)                  |
| 170            | NA                   | H7N2    | USA       | NA                  | 1995 | chicken             | AY254120 | A/Chicken/New York/19542-5/95 (H7N2)            |
| 171            | NA                   | H7N3    | Australia | A                   | 1994 | chicken             | CY022687 | A/chicken/Queensland/1994(H7N3)                 |
| 172            | NA                   | H7N3    | Australia | A                   | 1992 | chicken             | CY025079 | A/chicken/Victoria/224/1992(H7N3)               |
| 173            | NA                   | H7N3    | Bolivia   | SA                  | 2001 | cinnamon teal       | DQ525412 | A/cinnamon teal/Bolivia/4537/2001(H7N3)         |
| 174            | NA                   | H7N3    | Canada    | NA                  | 2007 | Canada goose        | EU500846 | A/Canada goose/BC/3752/2007(H7N3)               |
| 175            | NA                   | H7N3    | Canada    | NA                  | 2007 | American black duck | EU500854 | A/American black duck/NB/2538/2007(H7N3)        |
| 176            | NA                   | H7N3    | Canada    | NA                  | 2007 | chicken             | EU500862 | A/chicken/SK/HR-00011/2007(H7N3)                |
| 177            | NA                   | H7N3    | Canada    | NA                  | 2004 | chicken             | AY646080 | A/chicken/British Columbia/GSC_human_B/04(H7N3) |
| 178            | NA                   | H7N3    | Canada    | NA                  | 2004 | chicken             | AY611526 | A/chicken/British Columbia/04(H7N3)             |
| 179            | NA                   | H7N3    | Canada    | NA                  | 2001 | mallard             | DQ017503 | A/mallard/Alberta/24/01(H7N3)                   |
| 180            | NA                   | H7N3    | Canada    | NA                  | 1985 | green winged teal   | CY005052 | A/green-winged teal/ALB/228/1985(H7N3)          |
| 181            | NA                   | H7N3    | Canada    | NA                  | 1985 | mallard duck        | CY005059 | A/mallard duck/Alberta/435/1985(H7N3)           |

| # <sup>1</sup> | Protein <sup>2</sup> | Subtype | country     | Region <sup>3</sup> | Year | Animal            | GenBank  | Virus name                                         |
|----------------|----------------------|---------|-------------|---------------------|------|-------------------|----------|----------------------------------------------------|
| 182            | NA                   | H7N3    | Canada      | NA                  | 2004 | chicken           | AY650272 | A/GSC_chicken/British Columbia/04(H7N3)            |
| 183            | NA                   | H7N3    | Canada      | NA                  | 1977 | widgeon           | AY207505 | A/widgeon/Alberta/284/1977(H7N3)                   |
| 184            | NA                   | H7N3    | Canada      | NA                  | 2001 | mallard           | DQ017515 | A/mallard/Alberta/24/01(H7N3)                      |
| 185            | NA                   | H7N3    | Chile       | SA                  | 2002 | chicken           | AY303637 | A/chicken/Chile/4322/02(H7N3)                      |
| 186            | NA                   | H7N3    | Chile       | SA                  | 2002 | chicken           | AY303642 | A/chicken/Chile/4347/02(H7N3)                      |
| 187            | NA                   | H7N3    | Chile       | SA                  | 2002 | turkey            | AY303643 | A/turkey/Chile/4418/02(H7N3)                       |
| 188            | NA                   | H7N3    | Chile       | SA                  | 2002 | chicken           | AY303636 | A/chicken/Chile/176822/02(H7N3)                    |
| 189            | NA                   | H7N3    | Chile       | SA                  | 2002 | chicken           | AY303638 | A/chicken/Chile/4957/02(H7N3)                      |
| 190            | NA                   | H7N3    | Chile       | SA                  | 2002 | chicken           | AY303639 | A/chicken/Chile/4968/02(H7N3)                      |
| 191            | NA                   | H7N3    | Chile       | SA                  | 2002 | chicken           | AY303641 | A/chicken/Chile/4345/02(H7N3)                      |
| 192            | NA                   | H7N3    | Germany     | E                   | 1980 | gull              | AY207515 | A/gull/Heuwiese/899-6/80(H7N3)                     |
| 193            | NA                   | H7N3    | Italy       | E                   | 2003 | chicken           | CY034752 | A/chicken/Italy/682/2003(H7N3)                     |
| 194            | NA                   | H7N3    | Italy       | E                   | 2002 | turkey            | AY586418 | A/turkey/Italy/220158/2002(H7N3)                   |
| 195            | NA                   | H7N3    | Italy       | E                   | 2002 | turkey            | AY586417 | A/turkey/Italy/214845/2002(H7N3)                   |
| 196            | NA                   | H7N3    | Italy       | E                   | 2004 | quail             | CY020615 | A/quail/Italy/3347/2004(H7N3)                      |
| 197            | NA                   | H7N3    | Italy       | E                   | 2002 | turkey            | CY024740 | A/turkey/Italy/8000/2002(H7N3)                     |
| 198            | NA                   | H7N3    | Italy       | E                   | 2002 | turkey            | CY028662 | A/turkey/Italy/9742/2002(H7N3)                     |
| 199            | NA                   | H7N3    | Italy       | E                   | 2002 | turkey            | AJ627490 | A/turkey/Italy/214845/2002(H7N3)                   |
| 200            | NA                   | H7N3    | Italy       | E                   | 2002 | turkey            | AJ627494 | A/turkey/Italy/220158/2002(H7N3)                   |
| 201            | NA                   | H7N3    | Italy       | E                   | 2004 | turkey            | CY020583 | A/turkey/Italy/4479/2004(H7N3)                     |
| 202            | NA                   | H7N3    | Italy       | E                   | 2003 | turkey            | CY021359 | A/turkey/Italy/3620/2003(H7N3)                     |
| 203            | NA                   | H7N3    | Italy       | E                   | 2003 | turkey            | CY020591 | A/turkey/Italy/251/2003(H7N3)                      |
| 204            | NA                   | H7N3    | Italy       | E                   | 2003 | turkey            | CY022615 | A/turkey/Italy/2043/2003(H7N3)                     |
| 205            | NA                   | H7N3    | Italy       | E                   | 2002 | turkey            | CY031613 | A/turkey/Italy/9739/2002(H7N3)                     |
| 206            | NA                   | H7N3    | Italy       | E                   | 2003 | turkey            | CY021495 | A/turkey/Italy/2987/2003(H7N3)                     |
| 207            | NA                   | H7N3    | Italy       | E                   | 2003 | turkey            | CY021487 | A/turkey/Italy/4608/2003(H7N3)                     |
| 208            | NA                   | H7N3    | Italy       | E                   | 2004 | turkey            | CY020599 | A/turkey/Italy/3807/2004(H7N3)                     |
| 209            | NA                   | H7N3    | Italy       | E                   | 2001 | mallard           | EU158131 | A/mallard/Italy/199/01(H7N3)                       |
| 210            | NA                   | H7N3    | Italy       | E                   | 2001 | mallard           | AY586415 | A/mallard/Italy/33/01(H7N3)                        |
| 211            | NA                   | H7N3    | Japan       | E                   | 2006 | duck              | AB472025 | A/duck/Shimane/83/2006(H7N3)                       |
| 212            | NA                   | H7N3    | Netherlands | E                   | 2000 | mallard           | CY005846 | A/mallard/Netherlands/12/2000(H7N3)                |
| 213            | NA                   | H7N3    | Pakistan    | E                   | 2002 | chicken           | CY035825 | A/chicken/Rawalpindi/NARC68/2002(H7N3)             |
| 214            | NA                   | H7N3    | Pakistan    | E                   | 1998 | chicken           | CY037756 | A/chicken/Pakistan/c1998/1998(H7N3)                |
| 215            | NA                   | H7N3    | Pakistan    | E                   | 1995 | chicken           | CY035833 | A/chicken/Pakistan/34668/1995(H7N3)                |
| 216            | NA                   | H7N3    | Pakistan    | E                   | 1995 | chicken           | AY207504 | A/chicken/Pakistan/34669/1995(H7N3)                |
| 217            | NA                   | H7N3    | USA         | NA                  | 1985 | ruddy turnstone   | AY586421 | A/ruddy turnstone/New Jersey/65/1985(H7N3)         |
| 218            | NA                   | H7N3    | USA         | NA                  | 2006 | shorebird         | CY041324 | A/shorebird/Delaware Bay/332/2006(H7N3)            |
| 219            | NA                   | H7N3    | USA         | NA                  | 2006 | laughing gull     | CY037081 | A/laughing gull/Delaware Bay/6/2006(H7N3)          |
| 220            | NA                   | H7N3    | USA         | NA                  | 2007 | northern shoveler | CY039582 | A/northern shoveler/California/HKWF1026/2007(H7N3) |
| 221            | NA                   | H7N3    | USA         | NA                  | 2006 | shorebird         | CY036769 | A/shorebird/Delaware Bay/560/2006(H7N3)            |
| 222            | NA                   | H7N3    | USA         | NA                  | 2008 | northern shoveler | CY039598 | A/northern shoveler/California/HKWF2031/2008(H7N3) |
| 223            | NA                   | H7N3    | USA         | NA                  | 1980 | turkey            | AY586420 | A/turkey/Minnesota/916/1980(H7N3)                  |
| 224            | NA                   | H7N3    | USA         | NA                  | 2006 | ruddy turnstone   | CY041316 | A/ruddy turnstone/Delaware Bay/279/2006(H7N3)      |
| 225            | NA                   | H7N3    | USA         | NA                  | 2006 | laughing gull     | CY037089 | A/laughing gull/Delaware Bay/46/2006(H7N3)         |
| 226            | NA                   | H7N3    | USA         | NA                  | 1998 | Mallard           | CY016190 | A/Mallard/Ohio/322/1998(H7N3)                      |
| 227            | NA                   | H7N3    | USA         | NA                  | 2008 | green winged teal | CY039542 | A/green winged teal/California/AKS1370/2008(H7N3)  |
| 228            | NA                   | H7N3    | USA         | NA                  | 2007 | ruddy turnstone   | CY036777 | A/ruddy turnstone/Delaware Bay/108/2007(H7N3)      |
| 229            | NA                   | H7N3    | USA         | NA                  | 1980 | turkey            | CY014780 | A/turkey/Minnesota/1200/1980(H7N3)                 |
| 230            | NA                   | H7N3    | USA         | NA                  | 2006 | shorebird         | EU030970 | A/shorebird/Delaware/22/06(H7N3)                   |
| 231            | NA                   | H7N3    | USA         | NA                  | 2004 | blue winged teal  | CY018903 | A/blue-winged teal/Ohio/658/2004(H7N3)             |
| 232            | NA                   | H7N3    | USA         | NA                  | 1971 | turkey            | DQ870896 | A/turkey/Oregon/1971(H7N3)                         |
| 233            | NA                   | H7N3    | USA         | NA                  | 1979 | turkey            | AB294218 | A/turkey/Tennessee/1/1979(H7N3)                    |
| 234            | NA                   | H7N3    | USA         | NA                  | 1995 | turkey            | EU980469 | A/turkey/Utah/24721-10/1995(H7N3)                  |
| 235            | NA                   | H7N3    | USA         | NA                  | 2001 | black duck        | CY020887 | A/Black Duck/Ohio/415/2001(H7N3)                   |
| 236            | NA                   | H7N3    | USA         | NA                  | 2006 | laughing gull     | EU030986 | A/laughing gull/Delaware/42/06(H7N3)               |
| 237            | NA                   | H7N3    | USA         | NA                  | 2001 | duck              | EU743009 | A/duck/PA/143585/2001(H7N3)                        |
| 238            | NA                   | H7N3    | USA         | NA                  | 1985 | ruddy turnstone   | CY004407 | A/ruddy turnstone/New Jersey/65/1985(H7N3)         |
| 239            | NA                   | H7N3    | USA         | NA                  | 1983 | gadwell duck      | AY207507 | A/gadwell duck/Maryland/3495/83(H7N3)              |
| 240            | NA                   | H7N3    | USA         | NA                  | 1980 | turkey            | AY207514 | A/turkey/Minnesota/916/1980(H7N3)                  |
| 241            | NA                   | H7N3    | USA         | NA                  | 2001 | blue winged teal  | AY300951 | A/blue-winged teal/TX/2/01(H7N3)                   |
| 242            | NA                   | H7N3    | USA         | NA                  | 1971 | turkey            | DQ870890 | A/turkey/Oregon/1971(H7N3)                         |
| 243            | NA                   | H7N3    | USA         | NA                  | 1996 | ruddy turnstone   | AY207519 | A/ruddy turnstone/Delaware/135/96(H7N3)            |
| 244            | NA                   | H7N3    | USA         | NA                  | 1988 | shorebird         | AY207520 | A/shorebird/Delaware/2696/88(H7N3)                 |
| 245            | NA                   | H7N3    | USA         | NA                  | 1999 | chicken           | EU182301 | A/Chicken/NY/14714-2/1999(H7N3)                    |
| 246            | NA                   | H7N3    | USA         | NA                  | 1993 | duck              | AB450438 | A/duck/Alaska/3111/1993(H7N3)                      |
| 247            | NA                   | H7N3    | USA         | NA                  | 2005 | mallard           | CY021639 | A/mallard/Delaware/418/2005(H7N3)                  |
| 248            | NA                   | H7N3    | USA         | NA                  | 1980 | pheasant          | CY005890 | A/pheasant/Minnesota/917/1980(H7N3)                |
| 249            | NA                   | H7N3    | USA         | NA                  | 1995 | emu               | AY207511 | A/emu/Texas/25414-1/95(H7N3)                       |
| 250            | NA                   | H7N4    | Australia   | A                   | 1997 | chicken           | CY022695 | A/chicken/New South Wales/2/1997(H7N4)             |



| # <sup>1</sup> | Protein <sup>2</sup> | Subtype | country     | Region <sup>3</sup> | Year | Animal              | GenBank  | Virus name                               |
|----------------|----------------------|---------|-------------|---------------------|------|---------------------|----------|------------------------------------------|
| 251            | NA                   | H7N4    | Australia   | A                   | 1997 | chicken             | CY022703 | A/chicken/New South Wales/327/1997(H7N4) |
| 252            | NA                   | H7N4    | Australia   | A                   | 1997 | emu                 | CY022711 | A/emu/New South Wales/775/1997(H7N4)     |
| 253            | NA                   | H7N5    | Canada      | NA                  | 1977 | mallard duck        | CY005010 | A/mallard duck/ALB/224/1977(H7N5)        |
| 254            | NA                   | H7N6    | Australia   | A                   | 2007 | duck                |          | A/duck/Victoria/512/2007(H7N6)           |
| 255            | NA                   | H7N6    | Mongolia    | E                   | 2007 | duck                | AB450449 | A/duck/Mongolia/720/2007(H7N6)           |
| 256            | NA                   | H7N7    | Australia   | A                   | 1976 | duck                |          | A/duck/Victoria/76(H7N7)                 |
| 257            | NA                   | H7N7    | Australia   | A                   | 1985 | chicken             | CY025071 | A/chicken/Victoria/1/85(H7N7)            |
| 258            | NA                   | H7N7    | Australia   | A                   | 1985 | starling            | CY024780 | A/starling/Victoria/85(H7N7)             |
| 259            | NA                   | H7N7    | Australia   | A                   | 1976 | chicken             | CY024788 | A/chicken/Victoria/1976(H7N7)            |
| 260            | NA                   | H7N7    | Canada      | NA                  | 2007 | mallard             | AM933238 | A/mallard/Alberta/8734/07(H7N7)          |
| 261            | NA                   | H7N7    | Germany     | E                   | 2006 | Anser anser         | AM933236 | A/Anser anser/Germany/R752/06(H7N7)      |
| 262            | NA                   | H7N7    | Germany     | E                   | 2005 | Anas crecca         | AM933237 | A/Anas crecca/Germany/Wv177/05(H7N7)     |
| 263            | NA                   | H7N7    | Germany     | E                   | 2003 | chicken             | AJ620349 | A/chicken/Germany/R28/03(H7N7)           |
| 264            | NA                   | H7N7    | Japan       | E                   | 2007 | duck                | AB472031 | A/duck/Shiga/B149/2007(H7N7)             |
| 265            | NA                   | H7N7    | Japan       | E                   | 2007 | duck                | AB472059 | A/duck/Tsukuba/664/2007(H7N7)            |
| 266            | NA                   | H7N7    | Japan       | E                   | 2008 | duck                | AB472060 | A/duck/Tsukuba/922/2008(H7N7)            |
| 267            | NA                   | H7N7    | Japan       | E                   | 2008 | duck                | AB472061 | A/duck/Chiba/13/2008(H7N7)               |
| 268            | NA                   | H7N7    | Japan       | E                   | 2006 | duck                | AB472030 | A/duck/Shimane/18/2006(H7N7)             |
| 269            | NA                   | H7N7    | Japan       | E                   | 2007 | duck                | AB472063 | A/duck/Tsukuba/30/2007(H7N7)             |
| 270            | NA                   | H7N7    | Netherlands | E                   | 2003 | chicken             | AY340077 | A/chicken/Netherlands/1/03(H7N7)         |
| 271            | NA                   | H7N7    | Netherlands | E                   | 2003 | chicken             | EF015553 | A/chicken/Netherlands/03010132/03(H7N7)  |
| 272            | NA                   | H7N7    | New Zealand | NZ                  | 2005 | duck                |          | A/duck/New Zealand/2005(H7N7)            |
| 273            | NA                   | H7N7    | Norway      | E                   | 2006 | whooper swan        | FM179762 | A/whooper swan/Norway/10_438/2006(H7N7)  |
| 274            | NA                   | H7N7    | Taiwan      | E                   | 1999 | duck                | AB450450 | A/duck/Taiwan/4201/99(H7N7)              |
| 275            | NA                   | H7N7    | UK          | E                   | 1934 | fowl                | M38330   | A/fowl/Weybridge(H7N7)                   |
| 276            | NA                   | H7N7    | USA         | NA                  | 1989 | red knot            | CY005080 | A/red knot/NJ/325/1989(H7N7)             |
| 277            | NA                   | H7N7    | USA         | NA                  | 1988 | ruddy turnstone     | CY005073 | A/ruddy turnstone/DE/2378/1988(H7N7)     |
| 278            | NA                   | H7N7    | USA         | NA                  | 1927 | fowl                | CY014993 | A/fowl/Dobson/1927(H7N7)                 |
| 279            | NA                   | H7N8    | Canada      | NA                  | 1979 | pintail duck        | CY005040 | A/pintail duck/Alberta/121/1979(H7N8)    |
| 280            | NA                   | H7N8    | Japan       | E                   | 1999 | swan                | AB303079 | A/swan/Shimane/42/1999(H7N8)             |
| 281            | NA                   | H7N8    | Netherlands | E                   | 2006 | mallard             | CY041412 | A/mallard/Netherlands/33/2006(H7N8)      |
| 282            | NA                   | H7N8    | USA         | NA                  | 1987 | mallard             | CY021623 | A/mallard/Ohio/421/1987(H7N8)            |
| 283            | NA                   | H7N9    | Mongolia    | E                   | 2008 | duck                | AB481213 | A/duck/Mongolia/119/2008(H7N9)           |
| 284            | NA                   | H7N9    | USA         | NA                  | 1988 | turkey              | CY014788 | A/turkey/Minnesota/1/1988(H7N9)          |
| 285            | NA                   | H7N9    | USA         | NA                  | 2006 | blue winged teal    | CY024820 | A/blue-winged teal/Ohio/566/2006(H7N9)   |
| 1              | NP                   | H7N7    | Australia   | A                   | 1985 | starling            | CY024781 | A/starling/Victoria/85(H7N7)             |
| 2              | NP                   | H7N7    | Australia   | A                   | 1976 | duck                |          | A/duck/Victoria/76(H7N7)                 |
| 3              | NP                   | H7N6    | Australia   | A                   | 2007 | duck                |          | A/duck/Victoria/512/2007(H7N6)           |
| 4              | NP                   | H7N3    | Australia   | A                   | 1994 | chicken             | CY022688 | A/chicken/Queensland/1994(H7N3)          |
| 5              | NP                   | H7N4    | Australia   | A                   | 1997 | chicken             | CY022696 | A/chicken/New South Wales/2/1997(H7N4)   |
| 6              | NP                   | H7N4    | Australia   | A                   | 1997 | chicken             | CY022704 | A/chicken/New South Wales/327/1997(H7N4) |
| 7              | NP                   | H7N7    | Australia   | A                   | 1976 | chicken             | CY024789 | A/chicken/Victoria/1976(H7N7)            |
| 8              | NP                   | H7N7    | Australia   | A                   | 1985 | chicken             | CY025072 | A/chicken/Victoria/1/1985(H7N7)          |
| 9              | NP                   | H7N3    | Australia   | A                   | 1992 | chicken             | CY025080 | A/chicken/Victoria/224/1992(H7N3)        |
| 10             | NP                   | H7N4    | Australia   | A                   | 1997 | emu                 | CY022712 | A/emu/New South Wales/775/1997(H7N4)     |
| 11             | NP                   | H7N2    | Australia   | A                   | 2007 | duck                | CY033164 | A/duck/Tasmania/277/2007(H7N2)           |
| 12             | NP                   | H7N3    | Bolivia     | SA                  | 2001 | cinnamon teal       | DQ525414 | A/cinnamon teal/Bolivia/4537/2001(H7N3)  |
| 13             | NP                   | H7N3    | Canada      | NA                  | 1977 | blue winged teal    | CY005018 | A/blue-winged teal/ALB/295/1977(H7N3)    |
| 14             | NP                   | H7N9    | Canada      | NA                  | 1999 | mallard             | CY005092 | A/mallard/ALB/114/1999(H7N9)             |
| 15             | NP                   | H7N8    | Canada      | NA                  | 1979 | pintail duck        | CY005041 | A/pintail duck/Alberta/121/1979(H7N8)    |
| 16             | NP                   | H7N3    | Canada      | NA                  | 2004 | chicken             | AY611527 | A/chicken/British Columbia/04(H7N3)      |
| 17             | NP                   | H7N3    | Canada      | NA                  | 2001 | mallard             | DQ017505 | A/mallard/Alberta/24/01(H7N3)            |
| 18             | NP                   | H7N3    | Canada      | NA                  | 2001 | mallard             | CY004329 | A/mallard/Alberta/27/2001(H7N3)          |
| 19             | NP                   | H7N3    | Canada      | NA                  | 2004 | chicken             | AY650273 | A/GSC_chicken/British Columbia/04(H7N3)  |
| 20             | NP                   | H7N3    | Canada      | NA                  | 1985 | green winged teal   | CY005053 | A/green-winged teal/ALB/228/1985(H7N3)   |
| 21             | NP                   | H7N3    | Canada      | NA                  | 2007 | American black duck | EU500853 | A/American black duck/NB/2538/2007(H7N3) |
| 22             | NP                   | H7N3    | Canada      | NA                  | 2007 | Canada goose        | EU500845 | A/Canada goose/BC/3752/2007(H7N3)        |
| 23             | NP                   | H7N1    | Canada      | NA                  | 2001 | mallard             | CY005095 | A/mallard/Alberta/34/2001(H7N1)          |
| 24             | NP                   | H7N5    | Canada      | NA                  | 1977 | mallard duck        | CY005011 | A/mallard duck/ALB/224/1977(H7N5)        |
| 25             | NP                   | H7N3    | Canada      | NA                  | 1985 | mallard duck        | CY005060 | A/mallard duck/Alberta/435/1985(H7N3)    |
| 26             | NP                   | H7N3    | Canada      | NA                  | 1977 | mallard duck        | CY005030 | A/mallard duck/ALB/279/1977(H7N3)        |
| 27             | NP                   | H7N3    | Canada      | NA                  | 1976 | mallard duck        | CY004326 | A/mallard duck/ALB/48/1976(H7N3)         |
| 28             | NP                   | H7N3    | Canada      | NA                  | 2007 | chicken             | EU500861 | A/chicken/SK/HR-00011/2007(H7N3)         |
| 29             | NP                   | H7N3    | Chile       | SA                  | 2002 | chicken             | AY303659 | A/chicken/Chile/4957/02(H7N3)            |
| 30             | NP                   | H7N3    | Chile       | SA                  | 2002 | chicken             | AY303658 | A/chicken/Chile/176822/02(H7N3)          |
| 31             | NP                   | H7N3    | Chile       | SA                  | 2002 | chicken             | CY015029 | A/chicken/Chile/184240-4322/2002(H7N3)   |
| 32             | NP                   | H7N2    | China       | E                   | 2002 | chicken             | AY724258 | A/chicken/Hebei/1/2002(H7N2)             |
| 33             | NP                   | H7N7    | China       | E                   | 2003 | duck                | EU158134 | A/duck/Jiangxi/1786/03(H7N7)             |
| 34             | NP                   | H7N7    | China       | E                   | 2003 | duck                | EU158133 | A/duck/Jiangxi/1760/03(H7N7)             |
| 35             | NP                   | H7N1    | China       | E                   | 1992 | duck                | CY005496 | A/duck/Nanchang/1904/1992(H7N1)          |

| # <sup>1</sup> | Protein <sup>2</sup> | Subtype | country     | Region <sup>3</sup> | Year | Animal           | GenBank  | Virus name                                  |
|----------------|----------------------|---------|-------------|---------------------|------|------------------|----------|---------------------------------------------|
| 36             | NP                   | H7N7    | China       | E                   | 2003 | duck             | EU158140 | A/duck/Jiangxi/1742/03(H7N7)                |
| 37             | NP                   | H7N7    | Germany     | E                   | 2003 | chicken          | AJ620352 | A/chicken/Germany/R28/03(H7N7)              |
| 38             | NP                   | H7N1    | Germany     | E                   | 1934 | chicken          | M24557   | A/chicken/Rostock/8/1934(H7N1)              |
| 39             | NP                   | H7N1    | Germany     | E                   | 1934 | chicken          | M24556   | A/chicken/Rostock/8/1934(H7N1)              |
| 40             | NP                   | H7N1    | Germany     | E                   | 1934 | chicken          | M24660   | A/chicken/Rostock/8/1934(H7N1)              |
| 41             | NP                   | H7N1    | Germany     | E                   | 1934 | chicken          | M22576   | A/chicken/Rostock/8/1934(H7N1)              |
| 42             | NP                   | H7N1    | Germany     | E                   | 1934 | chicken          | M21937   | A/chicken/Rostock/8/1934(H7N1)              |
| 43             | NP                   | H7N7    | Germany     | E                   | 1979 | goose            | CY015042 | A/goose/Leipzig/187-7/1979(H7N7)            |
| 44             | NP                   | H7N1    | Germany     | E                   | 1934 | chicken          | CY015049 | A/chicken/Rostock/45/1934(H7N1)             |
| 45             | NP                   | H7N2    | Hong Kong   | E                   | 1978 | duck             | CY005621 | A/duck/Hong Kong/293/1978(H7N2)             |
| 46             | NP                   | H7N7    | Iceland     | E                   | 1980 | teal             | M63784   | A/teal/Iceland/29/1980(H7N7)                |
| 47             | NP                   | H7N1    | Ireland     | E                   | 1973 | parrot           | M22344   | A/parrot/Ulster/73(H7N1)                    |
| 48             | NP                   | H7N1    | Italy       | E                   | 1999 | chicken          | CY022680 | A/chicken/Italy/1082/99(H7N1)               |
| 49             | NP                   | H7N3    | Italy       | E                   | 2003 | turkey           | CY022616 | A/turkey/Italy/2043/2003(H7N3)              |
| 50             | NP                   | H7N1    | Italy       | E                   | 2000 | duck             | CY021560 | A/duck/Italy/551/2000(H7N1)                 |
| 51             | NP                   | H7N2    | Italy       | E                   | 2003 | quail            | CY021512 | A/quail/Italy/4610/2003(H7N2)               |
| 52             | NP                   | H7N1    | Italy       | E                   | 2000 | turkey           | CY021544 | A/turkey/Italy/4426/2000(H7N1)              |
| 53             | NP                   | H7N1    | Italy       | E                   | 2001 | chicken          | CY021552 | A/chicken/Italy/322/2001(H7N1)              |
| 54             | NP                   | H7N3    | Italy       | E                   | 2003 | turkey           | CY021360 | A/turkey/Italy/3620/2003(H7N3)              |
| 55             | NP                   | H7N1    | Italy       | E                   | 1999 | turkey           | CY021408 | A/turkey/Italy/4580/1999(H7N1)              |
| 56             | NP                   | H7N7    | Italy       | E                   | 1902 | chicken          | CY015055 | A/chicken/Brescia/1902(H7N7)                |
| 57             | NP                   | H7N1    | Italy       | E                   | 2000 | ostrich          | DQ991305 | A/ostrich/Italy/2332/00(H7N1)               |
| 58             | NP                   | H7N3    | Italy       | E                   | 2003 | chicken          | CY034753 | A/chicken/Italy/682/2003(H7N3)              |
| 59             | NP                   | H7N1    | Italy       | E                   | 1999 | turkey           | CY005791 | A/turkey/Italy/4169/1999(H7N1)              |
| 60             | NP                   | H7N1    | Italy       | E                   | 1999 | turkey           | CY021416 | A/turkey/Italy/3675/1999(H7N1)              |
| 61             | NP                   | H7N3    | Italy       | E                   | 2004 | turkey           | CY020584 | A/turkey/Italy/4479/2004(H7N3)              |
| 62             | NP                   | H7N3    | Italy       | E                   | 2002 | turkey           | AJ627486 | A/turkey/Italy/214845/2002(H7N3)            |
| 63             | NP                   | H7N2    | Italy       | E                   | 2003 | duck             | CY031031 | A/duck/Italy/4609/2003(H7N2)                |
| 64             | NP                   | H7N1    | Italy       | E                   | 1999 | turkey           | AJ627488 | A/turkey/Italy/4603/1999(H7N1)              |
| 65             | NP                   | H7N1    | Italy       | E                   | 2000 | guinea fowl      | CY022664 | A/guinea fowl/Italy/155/2000(H7N1)          |
| 66             | NP                   | H7N1    | Italy       | E                   | 2000 | turkey           | CY021536 | A/turkey/Italy/2984/2000(H7N1)              |
| 67             | NP                   | H7N3    | Italy       | E                   | 2003 | turkey           | CY021496 | A/turkey/Italy/2987/2003(H7N3)              |
| 68             | NP                   | H7N3    | Italy       | E                   | 2003 | turkey           | EU158139 | A/turkey/Italy/68819/03(H7N3)               |
| 69             | NP                   | H7N3    | Italy       | E                   | 2003 | turkey           | CY021368 | A/turkey/Italy/1010/2003(H7N3)              |
| 70             | NP                   | H7N3    | Italy       | E                   | 2002 | turkey           | CY020608 | A/turkey/Italy/8912/2002(H7N3)              |
| 71             | NP                   | H7N1    | Italy       | E                   | 2000 | chicken          | CY024765 | A/chicken/Italy/2335/2000(H7N1)             |
| 72             | NP                   | H7N1    | Italy       | E                   | 1999 | chicken          | DQ991321 | A/chicken/Italy/5093/99(H7N1)               |
| 73             | NP                   | H7N1    | Italy       | E                   | 1999 | turkey           | CY025184 | A/turkey/Italy/2732/1999(H7N1)              |
| 74             | NP                   | H7N1    | Italy       | E                   | 1999 | turkey           | CY025192 | A/turkey/Italy/1265/1999(H7N1)              |
| 75             | NP                   | H7N1    | Italy       | E                   | 1999 | turkey           | CY025168 | A/turkey/Italy/3560/1999(H7N1)              |
| 76             | NP                   | H7N3    | Italy       | E                   | 2002 | turkey           | CY028663 | A/turkey/Italy/9742/2002(H7N3)              |
| 77             | NP                   | H7N1    | Italy       | E                   | 1999 | turkey           | CY024861 | A/turkey/Italy/4708/1999(H7N1)              |
| 78             | NP                   | H7N1    | Italy       | E                   | 1999 | turkey           | CY024877 | A/turkey/Italy/4295/1999(H7N1)              |
| 79             | NP                   | H7N1    | Italy       | E                   | 1999 | chicken          | AJ584648 | A/Chicken/Italy/1067/99(H7N1)               |
| 80             | NP                   | H7N3    | Italy       | E                   | 2003 | chicken          | EU158132 | A/turkey/Italy/97500/03(H7N3)               |
| 81             | NP                   | H7N3    | Italy       | E                   | 2003 | turkey           | CY021488 | A/turkey/Italy/4608/2003(H7N3)              |
| 82             | NP                   | H7N1    | Italy       | E                   | 1999 | turkey           | CY005786 | A/turkey/Italy/3620/1999(H7N1)              |
| 83             | NP                   | H7N1    | Italy       | E                   | 2001 | turkey           | CY021424 | A/turkey/Italy/1351/2001(H7N1)              |
| 84             | NP                   | H7N1    | Italy       | E                   | 1999 | turkey           | CY024869 | A/turkey/Italy/4482/1999(H7N1)              |
| 85             | NP                   | H7N1    | Italy       | E                   | 2000 | pekin duck       | CY024901 | A/pekin duck/Italy/1848/2000(H7N1)          |
| 86             | NP                   | H7N3    | Italy       | E                   | 2004 | turkey           | CY020600 | A/turkey/Italy/3807/2004(H7N3)              |
| 87             | NP                   | H7N1    | Italy       | E                   | 1999 | turkey           | CY025160 | A/turkey/Italy/3489/1999(H7N1)              |
| 88             | NP                   | H7N3    | Italy       | E                   | 2004 | turkey           | CY028679 | A/turkey/Italy/3829/2004(H7N3)              |
| 89             | NP                   | H7N1    | Italy       | E                   | 2000 | chicken          | CY015017 | A/chicken/Italy/1285/2000(H7N1)             |
| 90             | NP                   | H7N1    | Italy       | E                   | 2000 | ostrich          | DQ991344 | A/ostrich/Italy/984/00(H7N1)                |
| 91             | NP                   | H7N1    | Mongolia    | E                   | 2002 | duck             | AB473544 | A/duck/Mongolia/867/2002(H7N1)              |
| 92             | NP                   | H7N1    | Mongolia    | E                   | 2001 | duck             | AB268554 | A/duck/Mongolia/47/2001(H7N1)               |
| 93             | NP                   | H7N3    | Netherlands | E                   | 2000 | mallard          | CY005847 | A/mallard/Netherlands/12/2000(H7N3)         |
| 94             | NP                   | H7N7    | Netherlands | E                   | 2003 | chicken          | AY342427 | A/chicken/Netherlands/1/03(H7N7)            |
| 95             | NP                   | H7N8    | Netherlands | E                   | 2006 | mallard          | CY041413 | A/mallard/Netherlands/33/2006(H7N8)         |
| 96             | NP                   | H7N7    | New Zealand | NZ                  | 2005 | duck             |          | A/duck/New Zealand/2005(H7N7)               |
| 97             | NP                   | H7N3    | Pakistan    | E                   | 1998 | chicken          | CY037755 | A/chicken/Pakistan/c1998/1998(H7N3)         |
| 98             | NP                   | H7N3    | Pakistan    | E                   | 1995 | chicken          | CY015035 | A/chicken/Pakistan/34669/1995(H7N3)         |
| 99             | NP                   | H7N3    | Pakistan    | E                   | 2002 | chicken          | CY035824 | A/chicken/Rawalpindi/NARC68/2002(H7N3)      |
| 100            | NP                   | H7N3    | Pakistan    | E                   | 1995 | chicken          | CY035832 | A/chicken/Pakistan/34668/1995(H7N3)         |
| 101            | NP                   | H7N7    | UK          | E                   | 1927 | fowl             | M63779   | A/fowl/Dobson/Dutch/1927(H7N7)              |
| 102            | NP                   | H7N1    | UK          | E                   | 1979 | African starling | AY724252 | A/African starling/England-Q/983/1979(H7N1) |
| 103            | NP                   | H7N3    | UK          | E                   | 1963 | turkey           | CY015068 | A/turkey/England/1963(H7N3)                 |
| 104            | NP                   | H7N2    | USA         | NA                  | 2005 | Muscovy duck     | CY034849 | A/Muscovy duck/New York/11646-4/2005(H7N2)  |
| 105            | NP                   | H7N2    | USA         | NA                  | 2005 | duck             | CY034809 | A/duck/New York/98616-4/2005(H7N2)          |
| 106            | NP                   | H7N2    | USA         | NA                  | 1996 | chicken          | EU980465 | A/chicken/NY/3202-7/1996(H7N2)              |

| # <sup>1</sup> | Protein <sup>2</sup> | Subtype | country | Region <sup>3</sup> | Year | Animal            | GenBank  | Virus name                                        |
|----------------|----------------------|---------|---------|---------------------|------|-------------------|----------|---------------------------------------------------|
| 107            | NP                   | H7N2    | USA     | NA                  | 1995 | emu               | EU980456 | A/emu/TX/25414/1995(H7N2)                         |
| 108            | NP                   | H7N2    | USA     | NA                  | 2005 | turkey            | CY031718 | A/turkey/New York/23164-11/2005(H7N2)             |
| 109            | NP                   | H7N3    | USA     | NA                  | 1995 | turkey            | EU980470 | A/turkey/Utah/24721-10/1995(H7N3)                 |
| 110            | NP                   | H7N3    | USA     | NA                  | 1985 | ruddy turnstone   | CY004408 | A/ruddy turnstone/New Jersey/65/1985(H7N3)        |
| 111            | NP                   | H7N3    | USA     | NA                  | 2004 | blue winged teal  | CY018904 | A/blue-winged teal/Ohio/658/2004(H7N3)            |
| 112            | NP                   | H7N3    | USA     | NA                  | 2006 | laughing gull     | EU030985 | A/laughing gull/Delaware/42/06(H7N3)              |
| 113            | NP                   | H7N3    | USA     | NA                  | 2001 | duck              | EU743010 | A/duck/PA/143585/2001(H7N3)                       |
| 114            | NP                   | H7N2    | USA     | NA                  | 1998 | goose             | EU743268 | A/goose/NY/8600-3/1998(H7N2)                      |
| 115            | NP                   | H7N2    | USA     | NA                  | 1997 | chicken           | EU742944 | A/chicken/PA/11767/1997(H7N2)                     |
| 116            | NP                   | H7N2    | USA     | NA                  | 2006 | chicken           | CY028631 | A/chicken/New York/29047-4/2006(H7N2)             |
| 117            | NP                   | H7N2    | USA     | NA                  | 2006 | guinea fowl       | CY028599 | A/Guinea fowl/New York/19501-4/2006(H7N2)         |
| 118            | NP                   | H7N2    | USA     | NA                  | 2005 | chicken           | CY031694 | A/chicken/New York/23164-7/2005(H7N2)             |
| 119            | NP                   | H7N2    | USA     | NA                  | 1999 | chicken           | EU742979 | A/chicken/NJ/16224-6/1999(H7N2)                   |
| 120            | NP                   | H7N1    | USA     | NA                  | 1993 | rhea              | EU742877 | A/rhea/North Carolina/39482/1993(H7N1)            |
| 121            | NP                   | H7N2    | USA     | NA                  | 2005 | chicken           | CY022824 | A/chicken/New York/16330/2005(H7N2)               |
| 122            | NP                   | H7N2    | USA     | NA                  | 2005 | chicken           | CY031774 | A/chicken/New York/42217/2005(H7N2)               |
| 123            | NP                   | H7N2    | USA     | NA                  | 2001 | chicken           | EU084912 | A/chicken/NY/119256-7/2001(H7N2)                  |
| 124            | NP                   | H7N3    | USA     | NA                  | 1998 | Mallard           | CY016191 | A/Mallard/Ohio/322/1998(H7N3)                     |
| 125            | NP                   | H7N7    | USA     | NA                  | 1988 | ruddy turnstone   | CY005074 | A/ruddy turnstone/DE/2378/1988(H7N7)              |
| 126            | NP                   | H7N2    | USA     | NA                  | 2005 | chicken           | CY031215 | A/chicken/New York/10196-6/2005(H7N2)             |
| 127            | NP                   | H7N2    | USA     | NA                  | 2006 | chicken           | CY028543 | A/chicken/New York/3181-5/2006(H7N2)              |
| 128            | NP                   | H7N2    | USA     | NA                  | 2005 | chicken           | CY031231 | A/chicken/New York/23164-6/2005(H7N2)             |
| 129            | NP                   | H7N3    | USA     | NA                  | 2006 | ruddy turnstone   | CY037106 | A/ruddy turnstone/Delaware Bay/283/2006(H7N3)     |
| 130            | NP                   | H7N3    | USA     | NA                  | 2006 | laughing gull     | CY037090 | A/laughing gull/Delaware Bay/46/2006(H7N3)        |
| 131            | NP                   | H7N2    | USA     | NA                  | 2006 | guinea fowl       | CY035997 | A/Guinea fowl/New York/19495-6/2006(H7N2)         |
| 132            | NP                   | H7N3    | USA     | NA                  | 2006 | ruddy turnstone   | CY041317 | A/ruddy turnstone/Delaware Bay/279/2006(H7N3)     |
| 133            | NP                   | H7N2    | USA     | NA                  | 2005 | guinea fowl       | CY037066 | A/Guinea fowl/New York/98616-3/2005(H7N2)         |
| 134            | NP                   | H7N2    | USA     | NA                  | 1999 | chicken           | FJ517327 | A/chicken/NY/21586-8/1999(H7N2)                   |
| 135            | NP                   | H7N2    | USA     | NA                  | 2005 | quail             | CY034393 | A/quail/New York/89641/2005(H7N2)                 |
| 136            | NP                   | H7N2    | USA     | NA                  | 2005 | chicken           | CY034841 | A/chicken/New York/10508/2005(H7N2)               |
| 137            | NP                   | H7N2    | USA     | NA                  | 2006 | chicken           | CY034905 | A/chicken/New York/19495-2/2006(H7N2)             |
| 138            | NP                   | H7N2    | USA     | NA                  | 2005 | chicken           | CY034801 | A/chicken/New York/88291-8/2005(H7N2)             |
| 139            | NP                   | H7N2    | USA     | NA                  | 2005 | chicken           | CY035949 | A/chicken/New York/11646-2/2005(H7N2)             |
| 140            | NP                   | H7N3    | USA     | NA                  | 2007 | ruddy turnstone   | CY036778 | A/ruddy turnstone/Delaware Bay/108/2007(H7N3)     |
| 141            | NP                   | H7N2    | USA     | NA                  | 2006 | guinea fowl       | CY028575 | A/Guinea fowl/New York/8391-1/2006(H7N2)          |
| 142            | NP                   | H7N2    | USA     | NA                  | 2005 | guinea fowl       | CY031654 | A/Guinea fowl/New York/22071/2005(H7N2)           |
| 143            | NP                   | H7N2    | USA     | NA                  | 2005 | chicken           | CY033308 | A/chicken/New York/63806-8/2005(H7N2)             |
| 144            | NP                   | H7N2    | USA     | NA                  | 2002 | guinea hen        | EU742974 | A/guinea hen/MA/14801-11/2002(H7N2)               |
| 145            | NP                   | H7N2    | USA     | NA                  | 1998 | chicken           | EU742924 | A/chicken/PA/13552-1/1998(H7N2)                   |
| 146            | NP                   | H7N2    | USA     | NA                  | 2005 | chicken           | CY031750 | A/chicken/New York/31621-9/2005(H7N2)             |
| 147            | NP                   | H7N2    | USA     | NA                  | 2005 | chicken           | CY022832 | A/chicken/New York/21211-2/2005(H7N2)             |
| 148            | NP                   | H7N2    | USA     | NA                  | 1997 | chicken           | EU742934 | A/chicken/NY/8030-2/1997(H7N2)                    |
| 149            | NP                   | H7N2    | USA     | NA                  | 1997 | chicken           | EU742929 | A/chicken/PA/7777-1/1997(H7N2)                    |
| 150            | NP                   | H7N7    | USA     | NA                  | 1927 | fowl              | CY014994 | A/fowl/Dobson/1927(H7N7)                          |
| 151            | NP                   | H7N2    | USA     | NA                  | 2002 | chicken           | CY014898 | A/chicken/Pennsylvania/143586/2002(H7N2)          |
| 152            | NP                   | H7N3    | USA     | NA                  | 2001 | black duck        | CY020888 | A/Black Duck/Ohio/415/2001(H7N3)                  |
| 153            | NP                   | H7N3    | USA     | NA                  | 2005 | mallard           | CY021640 | A/mallard/Delaware/418/2005(H7N3)                 |
| 154            | NP                   | H7N2    | USA     | NA                  | 2005 | chukar            | CY022768 | A/chukar/New York/11653-1/2005(H7N2)              |
| 155            | NP                   | H7N2    | USA     | NA                  | 2000 | chicken           | EU084906 | A/chicken/NY/30749-3/2000(H7N2)                   |
| 156            | NP                   | H7N2    | USA     | NA                  | 1997 | chicken           | EU084919 | A/chicken/NY/6777-3/1997(H7N2)                    |
| 157            | NP                   | H7N2    | USA     | NA                  | 1994 | chicken           | EU084926 | A/chicken/NY/4447-7/1994(H7N2)                    |
| 158            | NP                   | H7N2    | USA     | NA                  | 2001 | avian             | EU026098 | A/avian/NY/118353-1/2001(H7N2)                    |
| 159            | NP                   | H7N9    | USA     | NA                  | 2006 | blue winged teal  | CY024821 | A/blue-winged teal/Ohio/566/2006(H7N9)            |
| 160            | NP                   | H7N2    | USA     | NA                  | 2005 | chicken           | CY037098 | A/chicken/New York/87493-2/2005(H7N2)             |
| 161            | NP                   | H7N2    | USA     | NA                  | 2005 | guinea fowl       | CY031223 | A/Guinea fowl/New York/10196-7/2005(H7N2)         |
| 162            | NP                   | H7N2    | USA     | NA                  | 1997 | chicken           | EU742964 | A/chicken/PA/19241/1997(H7N2)                     |
| 163            | NP                   | H7N2    | USA     | NA                  | 2001 | guinea fowl       | EU742915 | A/guinea fowl/NJ/119063-8/2001(H7N2)              |
| 164            | NP                   | H7N3    | USA     | NA                  | 2006 | laughing gull     | CY037082 | A/laughing gull/Delaware Bay/6/2006(H7N3)         |
| 165            | NP                   | H7N2    | USA     | NA                  | 2006 | chicken           | CY031191 | A/chicken/New York/46545-2/2006(H7N2)             |
| 166            | NP                   | H7N3    | USA     | NA                  | 2008 | green winged teal | CY039541 | A/green winged teal/California/AKS1370/2008(H7N3) |
| 167            | NP                   | H7N3    | USA     | NA                  | 1971 | turkey            | DQ870889 | A/turkey/Oregon/1971(H7N3)                        |
| 168            | NP                   | H7N2    | USA     | NA                  | 2005 | chukar            | CY024845 | A/chukar/New York/21211-7/2005(H7N2)              |
| 169            | NP                   | H7N7    | USA     | NA                  | 1989 | red knot          | CY005081 | A/red knot/NJ/325/1989(H7N7)                      |
| 170            | NP                   | H7N3    | USA     | NA                  | 1980 | pheasant          | CY005891 | A/pheasant/Minnesota/917/1980(H7N3)               |
| 171            | NP                   | H7N2    | USA     | NA                  | 1995 | chicken           | EU182300 | A/chicken/NY/19542-5/1995(H7N2)                   |
| 172            | NP                   | H7N9    | USA     | NA                  | 1988 | turkey            | CY014789 | A/turkey/Minnesota/1/1988(H7N9)                   |
| 173            | NP                   | H7N2    | USA     | NA                  | 1995 | guinea fowl       | CY014839 | A/guinea fowl/New York/13820-3/1995(H7N2)         |
| 174            | NP                   | H7N3    | USA     | NA                  | 2006 | shorebird         | EU030969 | A/shorebird/Delaware/22/06(H7N3)                  |
| 175            | NP                   | H7N2    | USA     | NA                  | 1998 | quail             | EU742957 | A/quail/PA/20304/1998(H7N2)                       |
| 176            | NP                   | H7N2    | USA     | NA                  | 1998 | quail             | EU742920 | A/quail/NY/13989-51/1998(H7N2)                    |
| 177            | NP                   | H7N2    | USA     | NA                  | 2005 | chicken           | CY034193 | A/chicken/New York/143646-2/2005(H7N2)            |

| # <sup>1</sup> | Protein <sup>2</sup> | Subtype | country     | Region <sup>3</sup> | Year | Animal            | GenBank  | Virus name                                         |
|----------------|----------------------|---------|-------------|---------------------|------|-------------------|----------|----------------------------------------------------|
| 178            | NP                   | H7N2    | USA         | NA                  | 2005 | chicken           | CY034249 | A/chicken/New York/19499/2005(H7N2)                |
| 179            | NP                   | H7N2    | USA         | NA                  | 2005 | chicken           | CY037018 | A/chicken/New York/63806-11/2005(H7N2)             |
| 180            | NP                   | H7N2    | USA         | NA                  | 2001 | chicken           | EU742891 | A/chicken/FL/90348-4/2001(H7N2)                    |
| 181            | NP                   | H7N2    | USA         | NA                  | 2002 | turkey            | EU743262 | A/turkey/VA/158512/2002(H7N2)                      |
| 182            | NP                   | H7N3    | USA         | NA                  | 2008 | northern shoveler | CY039597 | A/northern shoveler/California/HKWF2031/2008(H7N3) |
| 183            | NP                   | H7N2    | USA         | NA                  | 2004 | chicken           | EU743256 | A/chicken/NJ/294508-12/2004(H7N2)                  |
| 184            | NP                   | H7N3    | USA         | NA                  | 2006 | shorebird         | CY036770 | A/shorebird/Delaware Bay/560/2006(H7N3)            |
| 185            | NP                   | H7N2    | USA         | NA                  | 2005 | muscovy duck      | CY034793 | A/Muscovy duck/New York/87493-3/2005(H7N2)         |
| 186            | NP                   | H7N2    | USA         | NA                  | 2005 | quail             | CY033316 | A/quail/New York/63806-13/2005(H7N2)               |
| 187            | NP                   | H7N2    | USA         | NA                  | 2002 | turkey            | EU982304 | A/turkey/VA/55/2002(H7N2)                          |
| 188            | NP                   | H7N2    | USA         | NA                  | 2005 | guinea fowl       | CY028510 | A/Guinea fowl/New York/143646-3/2005(H7N2)         |
| 189            | NP                   | H7N2    | USA         | NA                  | 2005 | chicken           | CY031119 | A/chicken/New York/30732-6/2005(H7N2)              |
| 190            | NP                   | H7N2    | USA         | NA                  | 2005 | chukar            | CY031071 | A/chukar/New York/23164-13/2005(H7N2)              |
| 191            | NP                   | H7N2    | USA         | NA                  | 1995 | chicken           | EU084908 | A/chicken/NY/3112-1/1995(H7N2)                     |
| 192            | NP                   | H7N3    | USA         | NA                  | 1999 | chicken           | EU084930 | A/Chicken/NY/14714-2/1999(H7N3)                    |
| 193            | NP                   | H7N7    | USA         | NA                  | 2007 | mallard           | CY033381 | A/mallard/California/HKWF1971/2007(H7N7)           |
| 194            | NP                   | H7N2    | USA         | NA                  | 2005 | chicken           | CY031079 | A/chicken/New York/23165-6/2005(H7N2)              |
| 195            | NP                   | H7N3    | USA         | NA                  | 2007 | northern shoveler | CY039581 | A/northern shoveler/California/HKWF1026/2007(H7N3) |
| 196            | NP                   | H7N2    | USA         | NA                  | 2005 | chicken           | CY034361 | A/chicken/New York/88291-6/2005(H7N2)              |
| 197            | NP                   | H7N2    | USA         | NA                  | 2005 | chicken           | CY029836 | A/chicken/New York/16326-4/2005(H7N2)              |
| 198            | NP                   | H7N2    | USA         | NA                  | 1995 | chicken           | EU742939 | A/chicken/RI/4328-1/1995(H7N2)                     |
| 199            | NP                   | H7N2    | USA         | NA                  | 1995 | chicken           | EU742953 | A/chicken/NY/13833-7/1995(H7N2)                    |
| 200            | NP                   | H7N2    | USA         | NA                  | 2002 | chicken           | EU742970 | A/chicken/PA/149092-1/2002(H7N2)                   |
| 201            | NP                   | H7N2    | USA         | NA                  | 2005 | chicken           | CY031638 | A/chicken/New York/22067-7/2005(H7N2)              |
| 202            | NP                   | H7N2    | USA         | NA                  | 2003 | chicken           | EU742998 | A/chicken/CT/260413-2/2003(H7N2)                   |
| 203            | NP                   | H7N2    | USA         | NA                  | 2005 | guinea fowl       | CY031678 | A/Guinea fowl/New York/23164-3-05/2005(H7N2)       |
| 204            | NP                   | H7N2    | USA         | NA                  | 2005 | chicken           | CY031686 | A/chicken/New York/23164-5/2005(H7N2)              |
| 205            | NP                   | H7N2    | USA         | NA                  | 1994 | turkey            | EU980461 | A/turkey/NY/4450-5/1994(H7N2)                      |
| 206            | NP                   | H7N2    | USA         | NA                  | 2005 | guinea fowl       | CY034833 | A/Guinea fowl/New York/101276-1/2005(H7N2)         |
| 207            | NP                   | H7N2    | USA         | NA                  | 2005 | turkey            | CY034897 | A/turkey/New York/122501-2/2005(H7N2)              |
| 208            | NP                   | H7N2    | USA         | NA                  | 2005 | guinea fowl       | CY035957 | A/Guinea fowl/New York/11646-3/2005(H7N2)          |
| 209            | NP                   | H7N2    | USA         | NA                  | 2006 | chicken           | CY036013 | A/chicken/New York/19499-1/2006(H7N2)              |
| 210            | NP                   | H7N2    | USA         | NA                  | 2005 | chicken           | CY034345 | A/chicken/New York/63806-12/2005(H7N2)             |
| 211            | NP                   | H7N2    | USA         | NA                  | 2005 | chicken           | CY034305 | A/chicken/New York/23165-10/2005(H7N2)             |
| 212            | NP                   | H7N3    | USA         | NA                  | 2007 | ruddy turnstone   | CY036786 | A/ruddy turnstone/Delaware Bay/121/2007(H7N3)      |
| 213            | NP                   | H7N2    | USA         | NA                  | 2001 | chicken           | EU182292 | A/chicken/NJ/118878-5/2001(H7N2)                   |
| 214            | NP                   | H7N2    | USA         | NA                  | 2005 | guinea fowl       | CY033284 | A/Guinea fowl/New York/31621-8/2005(H7N2)          |
| 215            | NP                   | H7N2    | USA         | NA                  | 2005 | guinea fowl       | CY031726 | A/Guinea fowl/New York/23165-12/2005(H7N2)         |
| 216            | NP                   | H7N2    | USA         | NA                  | 2006 | guinea fowl       | CY034241 | A/Guinea fowl/New York/32084/2006(H7N2)            |
| 217            | NP                   | H7N2    | USA         | NA                  | 1994 | chicken           | EU742948 | A/chicken/NY/13142-5/1994(H7N2)                    |
| 218            | NP                   | H7N3    | USA         | NA                  | 1994 | chicken           | EU743015 | A/chicken/New Jersey/15086-3/1994(H7N3)            |
| 219            | NP                   | H7N2    | USA         | NA                  | 2000 | chicken           | EU742983 | A/chicken/NJ/30739-6/2000(H7N2)                    |
| 220            | NP                   | H7N3    | USA         | NA                  | 1980 | turkey            | CY014781 | A/turkey/Minnesota/1200/1980(H7N3)                 |
| 221            | NP                   | H7N2    | USA         | NA                  | 2006 | chicken           | CY028583 | A/chicken/New York/8391-2/2006(H7N2)               |
| 222            | NP                   | H7N2    | USA         | NA                  | 2005 | chicken           | CY022816 | A/chicken/New York/16326-5/2005(H7N2)              |
| 223            | NP                   | H7N3    | USA         | NA                  | 1971 | turkey            | DQ870895 | A/turkey/Oregon/1971(H7N3)                         |
| 224            | NP                   | H7N2    | USA         | NA                  | 1997 | turkey            | EU084923 | A/turkey/PA/7975/1997(H7N2)                        |
| 225            | NP                   | H7N8    | USA         | NA                  | 1987 | mallard           | CY021624 | A/mallard/Ohio/421/1987(H7N8)                      |
| 1              | NS1                  | H7N7    | Australia   | A                   | 1985 | starling          | CY024782 | A/starling/Victoria/85(H7N7)                       |
| 2              | NS1                  | H7N4    | Australia   | A                   | 1997 | chicken           | CY022705 | A/chicken/New South Wales/327/97(H7N4)             |
| 3              | NS1                  | H7N7    | Australia   | A                   | 1985 | chicken           | CY025073 | A/chicken/Victoria/1/85(H7N7)                      |
| 4              | NS1                  | H7N7    | Australia   | A                   | 1976 | duck              |          | A/duck/Victoria/76(H7N7)                           |
| 5              | NS1                  | H7N6    | Australia   | A                   | 2007 | duck              |          | A/duck/Victoria/512/2007(H7N6)                     |
| 6              | NS1                  | H7N7    | New Zealand | NZ                  | 2005 | duck              |          | A/duck/New Zealand/2005(H7N7)                      |
| 7              | NS1                  | H7N3    | Afghanistan | E                   | 2004 | chicken           | EF688539 | A/chicken/Afghanistan/NARC-483/2004(H7N3)          |
| 8              | NS1                  | H7N3    | Australia   | A                   | 1994 | chicken           | CY022689 | A/chicken/Queensland/1994(H7N3)                    |
| 9              | NS1                  | H7N4    | Australia   | A                   | 1997 | chicken           | CY022697 | A/chicken/New South Wales/2/1997(H7N4)             |
| 10             | NS1                  | H7N7    | Australia   | A                   | 1976 | chicken           | CY024790 | A/chicken/Victoria/1976(H7N7)                      |
| 11             | NS1                  | H7N3    | Australia   | A                   | 1992 | chicken           | CY025081 | A/chicken/Victoria/224/1992(H7N3)                  |
| 12             | NS1                  | H7N4    | Australia   | A                   | 1997 | emu               | CY022713 | A/emu/New South Wales/775/1997(H7N4)               |
| 13             | NS1                  | H7N2    | Australia   | A                   | 2007 | duck              | CY033165 | A/duck/Tasmania/277/2007(H7N2)                     |
| 14             | NS1                  | H7N3    | Bolivia     | SA                  | 2001 | cinnamon teal     | DQ525413 | A/cinnamon teal/Bolivia/4537/2001(H7N3)            |
| 15             | NS1                  | H7N2    | Canada      | NA                  | 1978 | blue winged teal  | CY005035 | A/blue-winged teal/ALB/221/1978(H7N2)              |
| 16             | NS1                  | H7N3    | Canada      | NA                  | 1985 | green winged teal | CY005054 | A/green-winged teal/ALB/228/1985(H7N3)             |
| 17             | NS1                  | H7N3    | Canada      | NA                  | 2004 | chicken           | EF583621 | A/chicken/British Columbia/NS-01827-4/2004(H7N3)   |
| 18             | NS1                  | H7N3    | Canada      | NA                  | 2007 | Canada goose      | EU500848 | A/Canada goose/BC/3752/2007(H7N3)                  |
| 19             | NS1                  | H7      | Canada      | NA                  | 2007 | duck              | EF585299 | A/duck/AB/AFLBs8734c16/2007(H7)                    |
| 20             | NS1                  | H7N3    | Canada      | NA                  | 1985 | mallard duck      | CY005061 | A/mallard duck/Alberta/435/1985(H7N3)              |

| # <sup>1</sup> | Protein <sup>2</sup> | Subtype | country | Region <sup>3</sup> | Year | Animal              | GenBank  | Virus name                               |
|----------------|----------------------|---------|---------|---------------------|------|---------------------|----------|------------------------------------------|
| 21             | NS1                  | H7N3    | Canada  | NA                  | 2007 | American black duck | EU500856 | A/American black duck/NB/2538/2007(H7N3) |
| 22             | NS1                  | H7N3    | Canada  | NA                  | 2004 | chicken             | AY650274 | A/GSC_chicken/British Columbia/04(H7N3)  |
| 23             | NS1                  | H7N3    | Canada  | NA                  | 2001 | mallard             | DQ017506 | A/mallard/Alberta/24/01(H7N3)            |
| 24             | NS1                  | H7N3    | Canada  | NA                  | 2007 | chicken             | EU500864 | A/chicken/SK/HR-00011/2007(H7N3)         |
| 25             | NS1                  | H7N3    | Canada  | NA                  | 2004 | chicken             | AY611528 | A/chicken/British Columbia/04(H7N3)      |
| 26             | NS1                  | H7N3    | Canada  | NA                  | 1976 | mallard duck        | CY004327 | A/mallard duck/ALB/48/1976(H7N3)         |
| 27             | NS1                  | H7N5    | Canada  | NA                  | 1977 | mallard duck        | CY005012 | A/mallard duck/ALB/224/1977(H7N5)        |
| 28             | NS1                  | H7N3    | Canada  | NA                  | 1977 | blue winged teal    | CY005019 | A/blue-winged teal/ALB/295/1977(H7N3)    |
| 29             | NS1                  | H7N3    | Chile   | SA                  | 2002 | chicken             | AY303650 | A/chicken/Chile/4345/02(H7N3)            |
| 30             | NS1                  | H7N3    | Chile   | SA                  | 2003 | chicken             | AY303646 | A/chicken/Chile/4957/03(H7N3)            |
| 31             | NS1                  | H7N3    | Chile   | SA                  | 2003 | chicken             | AY303644 | A/chicken/Chile/176822/03(H7N3)          |
| 32             | NS1                  | H7N3    | Chile   | SA                  | 2003 | chicken             | AY303645 | A/chicken/Chile/4322/03(H7N3)            |
| 33             | NS1                  | H7N7    | China   | E                   | 2003 | duck                | EU158144 | A/duck/Jiangxi/1814/03(H7N7)             |
| 34             | NS1                  | H7N4    | China   | E                   | 1993 | duck                | U49493   | A/duck/Nanchang/1944/1993(H7N4)          |
| 35             | NS1                  | H7N7    | China   | E                   | 2003 | duck                | EU158150 | A/duck/Jiangxi/1786/03(H7N7)             |
| 36             | NS1                  | H7N7    | China   | E                   | 2003 | duck                | EU158147 | A/duck/Jiangxi/1742/03(H7N7)             |
| 37             | NS1                  | H7N2    | China   | E                   | 2002 | chicken             | AY724259 | A/chicken/Hebei/1/2002(H7N2)             |
| 38             | NS1                  | H7N1    | Germany | E                   | 1934 | chicken             | M60799   | A/chicken/Rostock/8/1934(H7N1)           |
| 39             | NS1                  | H7N1    | Germany | E                   | 1934 | chicken             | M29617   | A/chicken/Rostock/8/1934(H7N1)           |
| 40             | NS1                  | H7N7    | Germany | E                   | 2003 | chicken             | AJ619678 | A/chicken/Germany/R28/03(H7N7)           |
| 41             | NS1                  | H7N1    | Germany | E                   | 1934 | chicken             | V01101   | A/chicken/Rostock/8/1934(H7N1)           |
| 42             | NS1                  | H7N7    | Germany | E                   | 1979 | goose               | CY015043 | A/goose/Leipzig/187-7/1979(H7N7)         |
| 43             | NS1                  | H7N1    | Italy   | E                   | 1999 | chicken             | DQ090035 | A/chicken/Italy/5074/99(H7N1)            |
| 44             | NS1                  | H7N1    | Italy   | E                   | 2000 | turkey              | DQ090037 | A/turkey/Italy/421/00(H7N1)              |
| 45             | NS1                  | H7N1    | Italy   | E                   | 2000 | ostrich             | DQ090044 | A/ostrich/Italy/984/00(H7N1)             |
| 46             | NS1                  | H7N1    | Italy   | E                   | 2000 | turkey              | DQ090052 | A/turkey/Italy/4426/2000(H7N1)           |
| 47             | NS1                  | H7N7    | Italy   | E                   | 1902 | chicken             | CY015056 | A/chicken/Brescia/1902(H7N7)             |
| 48             | NS1                  | H7N1    | Italy   | E                   | 2000 | turkey              | CY021545 | A/turkey/Italy/4426/2000(H7N1)           |
| 49             | NS1                  | H7N1    | Italy   | E                   | 2001 | chicken             | CY021553 | A/chicken/Italy/322/2001(H7N1)           |
| 50             | NS1                  | H7N3    | Italy   | E                   | 2003 | turkey              | CY022617 | A/turkey/Italy/2043/2003(H7N3)           |
| 51             | NS1                  | H7N3    | Italy   | E                   | 2003 | turkey              | DQ090061 | A/turkey/Italy/3620/2003(H7N3)           |
| 52             | NS1                  | H7N3    | Italy   | E                   | 2003 | chicken             | DQ090064 | A/chicken/Italy/4616/2003(H7N3)          |
| 53             | NS1                  | H7N1    | Italy   | E                   | 1999 | turkey              | CY025137 | A/turkey/Italy/4294/1999(H7N1)           |
| 54             | NS1                  | H7N3    | Italy   | E                   | 2004 | turkey              | CY028688 | A/turkey/Italy/3477/2004(H7N3)           |
| 55             | NS1                  | H7N1    | Italy   | E                   | 2002 | mallard             | EU158145 | A/mallard/Italy/250/02(H7N1)             |
| 56             | NS1                  | H7N3    | Italy   | E                   | 2003 | turkey              | EU158148 | A/turkey/Italy/121964/03(H7N3)           |
| 57             | NS1                  | H7N7    | Italy   | E                   | 2005 | mallard             | EU158146 | A/mallard/Italy/299/05(H7N7)             |
| 58             | NS1                  | H7N2    | Italy   | E                   | 2003 | duck                | CY031032 | A/duck/Italy/4609/2003(H7N2)             |
| 59             | NS1                  | H7N1    | Italy   | E                   | 1999 | turkey              | DQ090025 | A/turkey/Italy/977/1999(H7N1)            |
| 60             | NS1                  | H7N1    | Italy   | E                   | 1999 | chicken             | DQ090027 | A/chicken/Italy/1082/99(H7N1)            |
| 61             | NS1                  | H7N3    | Italy   | E                   | 2003 | quail               | DQ090063 | A/quail/Italy/4610/03(H7N3)              |
| 62             | NS1                  | H7N1    | Italy   | E                   | 2000 | turkey              | CY021537 | A/turkey/Italy/2984/2000(H7N1)           |
| 63             | NS1                  | H7N1    | Italy   | E                   | 1999 | chicken             | CY022657 | A/chicken/Italy/4746/1999(H7N1)          |
| 64             | NS1                  | H7N1    | Italy   | E                   | 2000 | chicken             | DQ090036 | A/chicken/Italy/78/00(H7N1)              |
| 65             | NS1                  | H7N1    | Italy   | E                   | 2000 | chicken             | DQ090038 | A/chicken/Italy/522/00(H7N1)             |
| 66             | NS1                  | H7N1    | Italy   | E                   | 2000 | turkey              | DQ090045 | A/turkey/Italy/1713/00(H7N1)             |
| 67             | NS1                  | H7N1    | Italy   | E                   | 1999 | turkey              | CY005792 | A/turkey/Italy/4169/1999(H7N1)           |
| 68             | NS1                  | H7N3    | Italy   | E                   | 2004 | turkey              | CY020585 | A/turkey/Italy/4479/2004(H7N3)           |
| 69             | NS1                  | H7N3    | Italy   | E                   | 2002 | turkey              | AY586444 | A/turkey/Italy/214845/2002(H7N3)         |
| 70             | NS1                  | H7N3    | Italy   | E                   | 2004 | turkey              | CY028680 | A/turkey/Italy/3829/2004(H7N3)           |
| 71             | NS1                  | H7N3    | Italy   | E                   | 2004 | turkey              | CY029917 | A/turkey/Italy/4130/2004(H7N3)           |
| 72             | NS1                  | H7N3    | Italy   | E                   | 2003 | chicken             | CY034754 | A/chicken/Italy/682/2003(H7N3)           |
| 73             | NS1                  | H7N1    | Italy   | E                   | 2000 | duck                | DQ090039 | A/duck/Italy/551/2000(H7N1)              |
| 74             | NS1                  | H7N1    | Italy   | E                   | 2000 | guinea fowl         | CY022665 | A/guinea fowl/Italy/155/2000(H7N1)       |
| 75             | NS1                  | H7N1    | Italy   | E                   | 1999 | chicken             | DQ090029 | A/chicken/Italy/1279/99(H7N1)            |
| 76             | NS1                  | H7N3    | Italy   | E                   | 2003 | turkey              | CY021369 | A/turkey/Italy/1010/2003(H7N3)           |
| 77             | NS1                  | H7N1    | Italy   | E                   | 2000 | ostrich             | DQ991308 | A/ostrich/Italy/2332/00(H7N1)            |
| 78             | NS1                  | H7N3    | Italy   | E                   | 2001 | mallard             | AY586442 | A/mallard/Italy/33/01(H7N3)              |
| 79             | NS1                  | H7N1    | Italy   | E                   | 1999 | turkey              | CY025169 | A/turkey/Italy/3560/1999(H7N1)           |
| 80             | NS1                  | H7N3    | Italy   | E                   | 2007 | chicken             | EU873091 | A/chicken/Italy/3981/2007(H7N3)          |
| 81             | NS1                  | H7N1    | Italy   | E                   | 1999 | turkey              | CY024870 | A/turkey/Italy/4482/1999(H7N1)           |
| 82             | NS1                  | H7N3    | Italy   | E                   | 2001 | mallard             | EU158151 | A/mallard/Italy/199/01(H7N3)             |
| 83             | NS1                  | H7N1    | Italy   | E                   | 2001 | turkey              | CY021425 | A/turkey/Italy/1351/2001(H7N1)           |
| 84             | NS1                  | H7N3    | Italy   | E                   | 2004 | turkey              | CY020601 | A/turkey/Italy/3807/2004(H7N3)           |
| 85             | NS1                  | H7N1    | Italy   | E                   | 1999 | turkey              | DQ090034 | A/turkey/Italy/4580/1999(H7N1)           |
| 86             | NS1                  | H7N1    | Italy   | E                   | 2000 | chicken             | DQ090041 | A/chicken/Italy/662/00(H7N1)             |
| 87             | NS1                  | H7N1    | Italy   | E                   | 2000 | chicken             | DQ090042 | A/chicken/Italy/910/00(H7N1)             |
| 88             | NS1                  | H7N1    | Italy   | E                   | 2000 | chicken             | DQ090043 | A/chicken/Italy/914/00(H7N1)             |
| 89             | NS1                  | H7N1    | Italy   | E                   | 2001 | turkey              | DQ090056 | A/turkey/Italy/284/01(H7N1)              |
| 90             | NS1                  | H7N1    | Italy   | E                   | 2001 | turkey              | DQ090057 | A/turkey/Italy/1351/2001(H7N1)           |
| 91             | NS1                  | H7N3    | Italy   | E                   | 2003 | turkey              | CY021489 | A/turkey/Italy/4608/2003(H7N3)           |

| # <sup>1</sup> | Protein <sup>2</sup> | Subtype | country     | Region <sup>3</sup> | Year | Animal            | GenBank  | Virus name                                         |
|----------------|----------------------|---------|-------------|---------------------|------|-------------------|----------|----------------------------------------------------|
| 92             | NS1                  | H7N1    | Italy       | E                   | 1999 | turkey            | DQ090032 | A/turkey/Italy/2732/1999(H7N1)                     |
| 93             | NS1                  | H7N1    | Italy       | E                   | 1999 | turkey            | DQ090033 | A/turkey/Italy/3675/1999(H7N1)                     |
| 94             | NS1                  | H7N3    | Italy       | E                   | 2002 | turkey            | DQ090058 | A/turkey/Italy/8000/2002(H7N3)                     |
| 95             | NS1                  | H7N7    | Italy       | E                   | 1902 | chicken           | L37798   | A/chicken/Brescia/1902(H7N7)                       |
| 96             | NS1                  | H7N7    | Japan       | E                   | 1924 | chicken           | M16561   | A/chicken/Japan/1924(H7N7)                         |
| 97             | NS1                  | H7N1    | Mongolia    | E                   | 2001 | duck              | AB268556 | A/duck/Mongolia/47/2001(H7N1)                      |
| 98             | NS1                  | H7N1    | Mongolia    | E                   | 2002 | duck              | AB473547 | A/duck/Mongolia/867/2002(H7N1)                     |
| 99             | NS1                  | H7N7    | Netherlands | E                   | 2003 | chicken           | EF015555 | A/chicken/Netherlands/03010132/03(H7N7)            |
| 100            | NS1                  | H7N8    | Netherlands | E                   | 2006 | mallard           | CY041414 | A/mallard/Netherlands/33/2006(H7N8)                |
| 101            | NS1                  | H7N7    | Netherlands | E                   | 2003 | chicken           | AY342424 | A/chicken/Netherlands/1/03(H7N7)                   |
| 102            | NS1                  | H7N3    | Netherlands | E                   | 2000 | mallard           | CY005848 | A/mallard/Netherlands/12/2000(H7N3)                |
| 103            | NS1                  | H7N3    | Pakistan    | E                   | 2004 | chicken           | EF688538 | A/chicken/Pakistan/NARC-214/2004(H7N3)             |
| 104            | NS1                  | H7N3    | Pakistan    | E                   | 2004 | chicken           | EF688541 | A/chicken/Pakistan/NARC-100/2004(H7N3)             |
| 105            | NS1                  | H7N3    | Pakistan    | E                   | 2004 | chicken           | EF688553 | A/chicken/Pakistan/NARC-1118/2004(H7N3)            |
| 106            | NS1                  | H7N3    | Pakistan    | E                   | 2003 | chicken           | EF688536 | A/chicken/Pakistan/NARC-43/2003(H7N3)              |
| 107            | NS1                  | H7N3    | Pakistan    | E                   | 1995 | chicken           | CY035835 | A/chicken/Pakistan/34668/1995(H7N3)                |
| 108            | NS1                  | H7N3    | Pakistan    | E                   | 2002 | chicken           | CY035827 | A/chicken/Rawalpindi/NARC68/2002(H7N3)             |
| 109            | NS1                  | H7N3    | Pakistan    | E                   | 2004 | chicken           | EF688537 | A/chicken/Pakistan/NARC-169/2004(H7N3)             |
| 110            | NS1                  | H7N3    | Pakistan    | E                   | 2000 | chicken           | EF688540 | A/chicken/Pakistan/NARC-BM/2000(H7N3)              |
| 111            | NS1                  | H7N3    | Pakistan    | E                   | 2005 | chicken           | EF688542 | A/chicken/Pakistan/NARC-N19/2005(H7N3)             |
| 112            | NS1                  | H7N3    | Pakistan    | E                   | 2005 | chicken           | EF688547 | A/chicken/Pakistan/NARC-N30/2005(H7N3)             |
| 113            | NS1                  | H7N3    | Pakistan    | E                   | 2003 | chicken           | EF688549 | A/chicken/Pakistan/NARC-23/2003(H7N3)              |
| 114            | NS1                  | H7N3    | Pakistan    | E                   | 1995 | chicken           | CY015036 | A/chicken/Pakistan/34669/1995(H7N3)                |
| 115            | NS1                  | H7N3    | Pakistan    | E                   | 2004 | chicken           | EF688545 | A/chicken/Pakistan/NARC-70/2004(H7N3)              |
| 116            | NS1                  | H7N3    | Pakistan    | E                   | 2004 | chicken           | EF688546 | A/chicken/Pakistan/NARC-178/2004(H7N3)             |
| 117            | NS1                  | H7N3    | Pakistan    | E                   | 2004 | chicken           | EF688552 | A/chicken/Pakistan/NARC-160/2004(H7N3)             |
| 118            | NS1                  | H7N3    | Pakistan    | E                   | 2005 | chicken           | EF688534 | A/chicken/Pakistan/NARC-2419/2005(H7N3)            |
| 119            | NS1                  | H7N3    | Pakistan    | E                   | 2004 | chicken           | EF688535 | A/chicken/Pakistan/NARC-1282/2004(H7N3)            |
| 120            | NS1                  | H7N7    | Sweden      | E                   | 2005 | mallard           | EU518733 | A/mallard/Sweden/S90514/2005(H7N7)                 |
| 121            | NS1                  | H7N7    | Sweden      | E                   | 2005 | mallard           | EU518738 | A/mallard/Sweden/S90599/2005(H7N7)                 |
| 122            | NS1                  | H7N7    | UK          | E                   | 1934 | fowl              | L37800   | A/fowl/Weybridge(H7N7)                             |
| 123            | NS1                  | H7N3    | UK          | E                   | 1963 | turkey            | CY015069 | A/turkey/England/1963(H7N3)                        |
| 124            | NS1                  | H7N7    | UK          | E                   | 1927 | fowl              | L37799   | A/fowl/Dobson(H7N7)                                |
| 125            | NS1                  | H7N1    | UK          | E                   | 1979 | African starling  | AY724253 | A/African starling/England-Q/983/1979(H7N1)        |
| 126            | NS1                  | H7N3    | USA         | NA                  | 2006 | laughing gull     | EU030988 | A/laughing gull/Delaware/42/06(H7N3)               |
| 127            | NS1                  | H7N3    | USA         | NA                  | 2001 | black duck        | CY020889 | A/Black Duck/Ohio/415/2001(H7N3)                   |
| 128            | NS1                  | H7N2    | USA         | NA                  | 2005 | duck              | CY034810 | A/duck/New York/98616-4/2005(H7N2)                 |
| 129            | NS1                  | H7N3    | USA         | NA                  | 2006 | shorebird         | CY036771 | A/shorebird/Delaware Bay/560/2006(H7N3)            |
| 130            | NS1                  | H7N3    | USA         | NA                  | 2007 | ruddy turnstone   | CY036779 | A/ruddy turnstone/Delaware Bay/108/2007(H7N3)      |
| 131            | NS1                  | H7N2    | USA         | NA                  | 2005 | guinea fowl       | CY031767 | A/Guinea fowl/New York/37982-3/2005(H7N2)          |
| 132            | NS1                  | H7N2    | USA         | NA                  | 1995 | chicken           | AF074271 | A/Chicken/New York/13833-7/95 (H7N2NSB)            |
| 133            | NS1                  | H7N2    | USA         | NA                  | 1997 | chicken           | AF074278 | A/Chicken/New York/6777-3/97 (H7N2NSB)             |
| 134            | NS1                  | H7N3    | USA         | NA                  | 1983 | chicken           | U96741   | A/Chicken/Pennsylvania/21525/83)                   |
| 135            | NS1                  | H7N1    | USA         | NA                  | 1993 | rhea              | AF007036 | A/rhea/North Carolina/39482/93 (H7N1NS1)           |
| 136            | NS1                  | H7N3    | USA         | NA                  | 1980 | pheasant          | CY005892 | A/pheasant/Minnesota/917/1980(H7N3)                |
| 137            | NS1                  | H7N3    | USA         | NA                  | 1998 | mallard           | DQ021607 | A/mallard/MN/88/98(H7N3)                           |
| 138            | NS1                  | H7N3    | USA         | NA                  | 2000 | laughing gull     | DQ021641 | A/laughing gull/NY/2455/00(H7N3)                   |
| 139            | NS1                  | H7N3    | USA         | NA                  | 1999 | chicken           | EU084931 | A/Chicken/NY/14714-2/1999(H7N3)                    |
| 140            | NS1                  | H7N9    | USA         | NA                  | 2006 | blue winged teal  | CY024822 | A/blue-winged teal/Ohio/566/2006(H7N9)             |
| 141            | NS1                  | H7N7    | USA         | NA                  | 1989 | red knot          | CY005082 | A/red knot/NJ/325/1989(H7N7)                       |
| 142            | NS1                  | H7N2    | USA         | NA                  | 2000 | avian             | AY241626 | A/avian/NY/76247-3/00(H7N2)                        |
| 143            | NS1                  | H7N2    | USA         | NA                  | 2001 | chicken           | AY241630 | A/chicken/NJ/118878-5/2001(H7N2)                   |
| 144            | NS1                  | H7N2    | USA         | NA                  | 2002 | chicken           | AY241632 | A/chicken/NJ/151244-18/02(H7N2)                    |
| 145            | NS1                  | H7N2    | USA         | NA                  | 1998 | chicken           | AY241640 | A/chicken/NY/1387-8/98(H7N2)                       |
| 146            | NS1                  | H7N2    | USA         | NA                  | 2002 | chicken           | AY241653 | A/chicken/VA/32/02(H7N2)                           |
| 147            | NS1                  | H7N3    | USA         | NA                  | 2005 | mallard           | CY021641 | A/mallard/Delaware/418/2005(H7N3)                  |
| 148            | NS1                  | H7N2    | USA         | NA                  | 2005 | chicken           | CY037019 | A/chicken/New York/63806-11/2005(H7N2)             |
| 149            | NS1                  | H7N3    | USA         | NA                  | 2007 | northern shoveler | CY039584 | A/northern shoveler/California/HKWF1026/2007(H7N3) |
| 150            | NS1                  | H7N2    | USA         | NA                  | 2001 | guinea fowl       | EU742916 | A/guinea fowl/NJ/119063-8/2001(H7N2)               |
| 151            | NS1                  | H7N2    | USA         | NA                  | 2005 | guinea fowl       | CY031224 | A/Guinea fowl/New York/10196-7/2005(H7N2)          |
| 152            | NS1                  | H7N2    | USA         | NA                  | 2005 | chicken           | CY031080 | A/chicken/New York/23165-6/2005(H7N2)              |
| 153            | NS1                  | H7N2    | USA         | NA                  | 2005 | chukar            | CY031072 | A/chukar/New York/23164-13/2005(H7N2)              |
| 154            | NS1                  | H7N2    | USA         | NA                  | 2005 | chicken           | CY031120 | A/chicken/New York/30732-6/2005(H7N2)              |
| 155            | NS1                  | H7N2    | USA         | NA                  | 2005 | chicken           | CY035934 | A/chicken/New York/88291-10/2005(H7N2)             |
| 156            | NS1                  | H7N2    | USA         | NA                  | 2005 | duck              | CY034818 | A/duck/New York/98616-5/2005(H7N2)                 |
| 157            | NS1                  | H7N2    | USA         | NA                  | 2005 | guinea fowl       | CY034834 | A/Guinea fowl/New York/101276-1/2005(H7N2)         |
| 158            | NS1                  | H7N2    | USA         | NA                  | 2005 | quail             | CY033317 | A/quail/New York/63806-13/2005(H7N2)               |
| 159            | NS1                  | H7N3    | USA         | NA                  | 2008 | northern shoveler | CY039600 | A/northern shoveler/California/HKWF2031/2008(H7N3) |
| 160            | NS1                  | H7N3    | USA         | NA                  | 2008 | green winged teal | CY039544 | A/green winged teal/California/AKS1370/2008(H7N3)  |

| # <sup>1</sup> | Protein <sup>2</sup> | Subtype | country | Region <sup>3</sup> | Year | Animal           | GenBank  | Virus name                                   |
|----------------|----------------------|---------|---------|---------------------|------|------------------|----------|----------------------------------------------|
| 161            | NS1                  | H7N2    | USA     | NA                  | 2001 | chicken          | EU742892 | A/chicken/FL/90348-4/2001(H7N2)              |
| 162            | NS1                  | H7N2    | USA     | NA                  | 2000 | avian            | AY241625 | A/avian/NY/70411-12/00(H7N2)                 |
| 163            | NS1                  | H7N2    | USA     | NA                  | 1999 | chicken          | AY241633 | A/chicken/NJ/16224-6/1999(H7N2)              |
| 164            | NS1                  | H7N2    | USA     | NA                  | 2002 | chicken          | AY241635 | A/chicken/NJ/608/02(H7N2)                    |
| 165            | NS1                  | H7N2    | USA     | NA                  | 2001 | chicken          | AY241638 | A/chicken/NY/119256-7/2001(H7N2)             |
| 166            | NS1                  | H7N3    | USA     | NA                  | 1999 | chicken          | AY241641 | A/chicken/New York/14714-9/1999(H7N3)        |
| 167            | NS1                  | H7N2    | USA     | NA                  | 1997 | chicken          | AY241648 | A/Chicken/PA/9701027B/97(H7N2)               |
| 168            | NS1                  | H7N2    | USA     | NA                  | 1998 | chicken          | AY241652 | A/chicken/PA/9801289/98(H7N2)                |
| 169            | NS1                  | H7N3    | USA     | NA                  | 2004 | blue winged teal | CY018905 | A/blue-winged teal/Ohio/658/2004(H7N3)       |
| 170            | NS1                  | H7N2    | USA     | NA                  | 1987 | laughing gull    | U49488   | A/laughing gull/Delaware/2838/1987(H7N2)     |
| 171            | NS1                  | H7N9    | USA     | NA                  | 2000 | ruddy turnstone  | DQ021611 | A/ruddy turnstone/DE/1538/2000(H7N9)         |
| 172            | NS1                  | H7N2    | USA     | NA                  | 2006 | chicken          | CY028584 | A/chicken/New York/8391-2/2006(H7N2)         |
| 173            | NS1                  | H7N3    | USA     | NA                  | 1971 | turkey           | U96740   | A/turkey/Oregon/1971(H7N3)                   |
| 174            | NS1                  | H7N2    | USA     | NA                  | 1994 | chicken          | AF001409 | A/Chicken/New York/13142-5/94 (H7N2)         |
| 175            | NS1                  | H7N8    | USA     | NA                  | 1987 | mallard          | AF007035 | A/mallard/Ohio/421/1987(H7N8)                |
| 176            | NS1                  | H7N2    | USA     | NA                  | 2005 | chicken          | CY031639 | A/chicken/New York/22067-7/2005(H7N2)        |
| 177            | NS1                  | H7N2    | USA     | NA                  | 2005 | guinea fowl      | CY031679 | A/Guinea fowl/New York/23164-3-05/2005(H7N2) |
| 178            | NS1                  | H7N2    | USA     | NA                  | 2005 | chicken          | CY034362 | A/chicken/New York/88291-6/2005(H7N2)        |
| 179            | NS1                  | H7N2    | USA     | NA                  | 2006 | guinea fowl      | CY034242 | A/Guinea fowl/New York/32084/2006(H7N2)      |
| 180            | NS1                  | H7N2    | USA     | NA                  | 2005 | chicken          | CY033309 | A/chicken/New York/63806-8/2005(H7N2)        |
| 181            | NS1                  | H7N2    | USA     | NA                  | 2005 | guinea fowl      | CY031727 | A/Guinea fowl/New York/23165-12/2005(H7N2)   |
| 182            | NS1                  | H7N3    | USA     | NA                  | 1985 | ruddy turnstone  | CY004409 | A/ruddy turnstone/New Jersey/65/1985(H7N3)   |
| 183            | NS1                  | H7N3    | USA     | NA                  | 1980 | turkey           | CY014782 | A/turkey/Minnesota/1200/1980(H7N3)           |
| 184            | NS1                  | H7N2    | USA     | NA                  | 1995 | guinea fowl      | CY014840 | A/guinea fowl/New York/13820-3/1995(H7N2)    |
| 185            | NS1                  | H7N9    | USA     | NA                  | 1988 | turkey           | CY014790 | A/turkey/Minnesota/1/1988(H7N9)              |
| 186            | NS1                  | H7N2    | USA     | NA                  | 1995 | guinea fowl      | AF074270 | A/Guinea Fowl/New York/13820-3/95 (H7N2NSB)  |
| 187            | NS1                  | H7N2    | USA     | NA                  | 1995 | chicken          | AF074272 | A/Chicken/New York/19542-5/95 (H7N2NSB)      |
| 188            | NS1                  | H7N2    | USA     | NA                  | 1997 | turkey           | AF074279 | A/Turkey/Pennsylvania/7975/97 (H7N2NSB)      |
| 189            | NS1                  | H7N3    | USA     | NA                  | 1995 | turkey           | AF074284 | A/turkey/Utah/24721-10/95 (H7N3NSA)          |
| 190            | NS1                  | H7N2    | USA     | NA                  | 2006 | guinea fowl      | CY028600 | A/Guinea fowl/New York/19501-4/2006(H7N2)    |
| 191            | NS1                  | H7N2    | USA     | NA                  | 2006 | chicken          | CY028632 | A/chicken/New York/29047-4/2006(H7N2)        |
| 192            | NS1                  | H7N2    | USA     | NA                  | 2005 | chicken          | CY034250 | A/chicken/New York/19499/2005(H7N2)          |
| 193            | NS1                  | H7N2    | USA     | NA                  | 2001 | chicken          | EU182289 | A/chicken/PA/143586/2001(H7N2)               |
| 194            | NS1                  | H7N2    | USA     | NA                  | 2005 | chicken          | CY031775 | A/chicken/New York/42217/2005(H7N2)          |
| 195            | NS1                  | H7N2    | USA     | NA                  | 2003 | chicken          | EU742999 | A/chicken/CT/260413-2/2003(H7N2)             |
| 196            | NS1                  | H7N2    | USA     | NA                  | 2004 | chicken          | EU743257 | A/chicken/NJ/294508-12/2004(H7N2)            |
| 197            | NS1                  | H7N3    | USA     | NA                  | 2001 | duck             | EU743011 | A/duck/PA/143585/2001(H7N3)                  |
| 198            | NS1                  | H7N2    | USA     | NA                  | 1998 | goose            | EU743269 | A/goose/NY/8600-3/1998(H7N2)                 |
| 199            | NS1                  | H7N2    | USA     | NA                  | 2005 | guinea fowl      | CY035926 | A/Guinea fowl/New York/88291-9/2005(H7N2)    |
| 200            | NS1                  | H7N3    | USA     | NA                  | 1994 | chicken          | AF074267 | A/chicken/New Jersey/15086-3/1994(H7N3)NSA)  |
| 201            | NS1                  | H7N2    | USA     | NA                  | 1994 | chicken          | AF074268 | A/Chicken/New York/4447-7/94 (H7N2NSA)       |
| 202            | NS1                  | H7N2    | USA     | NA                  | 1994 | turkey           | AF074269 | A/Turkey/New York/4450-5/94 (H7N2NSB)        |
| 203            | NS1                  | H7N2    | USA     | NA                  | 1995 | chicken          | AF074273 | A/Chicken/New York/3112-1/95 (H7N2NSB)       |
| 204            | NS1                  | H7N2    | USA     | NA                  | 1995 | chicken          | AF074274 | A/Chicken/Rhode Island/4328/95 (H7N2NSB)     |
| 205            | NS1                  | H7N2    | USA     | NA                  | 1996 | chicken          | AF074275 | A/Chicken/New York/8030-2/96 (H7N2NSB)       |
| 206            | NS1                  | H7N2    | USA     | NA                  | 1998 | chicken          | AF074280 | A/Chicken/Pennsylvania/13552-1/98 (H7N2NSB)  |
| 207            | NS1                  | H7N2    | USA     | NA                  | 1998 | Quail            | AF074281 | A/Quail/New York/13989-51/98 (H7N2NSA)       |
| 208            | NS1                  | H7N3    | USA     | NA                  | 1991 | turkey           | AF074282 | A/Turkey/Colorado/13356/91 (H7N3NSA)         |
| 209            | NS1                  | H7N3    | USA     | NA                  | 1994 | Quail            | AF074283 | A/Quail/Arkansas/16309-7/94 (H7N3NSA)        |
| 210            | NS1                  | H7N2    | USA     | NA                  | 2005 | chicken          | CY031703 | A/chicken/New York/23164-9/2005(H7N2)        |
| 211            | NS1                  | H7N2    | USA     | NA                  | 1995 | emu              | EU980457 | A/emu/TX/25414/1995(H7N2)                    |
| 212            | NS1                  | H7N2    | USA     | NA                  | 2005 | muscovy duck     | CY034794 | A/Muscovy duck/New York/87493-3/2005(H7N2)   |
| 213            | NS1                  | H7N2    | USA     | NA                  | 2005 | chicken          | CY034802 | A/chicken/New York/88291-8/2005(H7N2)        |
| 214            | NS1                  | H7N2    | USA     | NA                  | 2005 | muscovy duck     | CY034850 | A/Muscovy duck/New York/11646-4/2005(H7N2)   |
| 215            | NS1                  | H7N2    | USA     | NA                  | 2006 | chicken          | CY034906 | A/chicken/New York/19495-2/2006(H7N2)        |
| 216            | NS1                  | H7N2    | USA     | NA                  | 2000 | chicken          | AY241634 | A/Chicken/New Jersey/30739-6/00(H7N2)        |
| 217            | NS1                  | H7N3    | USA     | NA                  | 1999 | chicken          | AY241639 | A/chicken/New York/12273-11/1999(H7N3)       |
| 218            | NS1                  | H7N2    | USA     | NA                  | 2002 | chicken          | AY241647 | A/chicken/PA/149092-1/2002(H7N2)             |
| 219            | NS1                  | H7N2    | USA     | NA                  | 1997 | chicken          | AY241650 | A/chicken/PA/9701530/97(H7N2)                |
| 220            | NS1                  | H7N2    | USA     | NA                  | 1998 | chicken          | AY241651 | A/chicken/PA/9800896/98(H7N2)                |
| 221            | NS1                  | H7N2    | USA     | NA                  | 1998 | chicken          | AY241663 | A/Chicken/NY/21665-73/98(H7N2)               |
| 222            | NS1                  | H7N4    | USA     | NA                  | 2001 | blue winged teal | DQ021547 | A/blue-winged teal/TX/11/01(H7N4)            |
| 223            | NS1                  | H7N7    | USA     | NA                  | 1999 | mallard          | DQ021559 | A/mallard/MN/17/99(H7N7)                     |
| 224            | NS1                  | H7N3    | USA     | NA                  | 1998 | mallard          | DQ021596 | A/mallard/MN/187/98(H7N3)                    |
| 225            | NS1                  | H7N3    | USA     | NA                  | 1998 | Mallard          | CY016192 | A/Mallard/Ohio/322/1998(H7N3)                |
| 226            | NS1                  | H7N7    | USA     | NA                  | 1988 | ruddy turnstone  | CY005075 | A/ruddy turnstone/DE/2378/1988(H7N7)         |
| 227            | NS1                  | H7N3    | USA     | NA                  | 2006 | laughing gull    | CY037091 | A/laughing gull/Delaware Bay/46/2006(H7N3)   |
| 228            | NS1                  | H7N2    | USA     | NA                  | 2005 | chicken          | CY031232 | A/chicken/New York/23164-6/2005(H7N2)        |
| 229            | NS1                  | H7N2    | USA     | NA                  | 2006 | chicken          | CY036014 | A/chicken/New York/19499-1/2006(H7N2)        |
| 230            | NS1                  | H7N2    | USA     | NA                  | 2005 | chicken          | CY031216 | A/chicken/New York/10196-6/2005(H7N2)        |
| 231            | NS1                  | H7N2    | USA     | NA                  | 2005 | guinea fowl      | CY028511 | A/Guinea fowl/New York/143646-3/2005(H7N2)   |
| 232            | NS1                  | H7N2    | USA     | NA                  | 2005 | guinea fowl      | CY037067 | A/Guinea fowl/New York/98616-3/2005(H7N2)    |

| # <sup>1</sup> | Protein <sup>2</sup> | Subtype | country   | Region <sup>3</sup> | Year | Animal              | GenBank  | Virus name                                          |
|----------------|----------------------|---------|-----------|---------------------|------|---------------------|----------|-----------------------------------------------------|
| 233            | NS1                  | H7N2    | USA       | NA                  | 1987 | gull                | M80977   | A/gull/Delaware/2838/1987(H7N2)                     |
| 234            | NS1                  | H7N3    | USA       | NA                  | 1977 | Gull                | U96742   | A/Gull/Maryland/19/77)                              |
| 235            | NS1                  | H7N2    | USA       | NA                  | 1996 | chicken             | AF001410 | A/Chicken/NY/13202-7/96 (H7N2)                      |
| 236            | NS1                  | H7N2    | USA       | NA                  | 2006 | chicken             | CY028544 | A/chicken/New York/3181-5/2006(H7N2)                |
| 237            | NS1                  | H7N2    | USA       | NA                  | 2000 | avian               | AY241627 | A/avian/NY/81746-5/00(H7N2)                         |
| 238            | NS1                  | H7N2    | USA       | NA                  | 2001 | chicken             | AY241629 | A/Chicken/NJ/118555-2/01(H7N2)                      |
| 239            | NS1                  | H7N2    | USA       | NA                  | 2002 | chicken             | AY241631 | A/chicken/NJ/150383-7/02(H7N2)                      |
| 240            | NS1                  | H7N2    | USA       | NA                  | 1999 | chicken             | AY241644 | A/chicken/NY/22409-4/99(H7N2)                       |
| 241            | NS1                  | H7N2    | USA       | NA                  | 2000 | chicken             | AY241645 | A/chicken/NY/30749-3/2000(H7N2)                     |
| 242            | NS1                  | H7N2    | USA       | NA                  | 1998 | quail               | AY241656 | A/quail/PA/20304/1998(H7N2)                         |
| 243            | NS1                  | H7N2    | USA       | NA                  | 1998 | turkey              | AY241658 | A/turkey/NJ/9778-8/98(H7N2)                         |
| 244            | NS1                  | H7N3    | USA       | NA                  | 2001 | blue winged teal    | AY300999 | A/blue-winged teal/TX/2/01(H7N3)                    |
| 245            | NS1                  | H7N3    | USA       | NA                  | 1998 | mallard             | DQ021603 | A/mallard/MN/284/98(H7N3)                           |
| 246            | NS1                  | H7N2    | USA       | NA                  | 2005 | guinea fowl         | CY031655 | A/Guinea fowl/New York/22071/2005(H7N2)             |
| 247            | NS1                  | H7N2    | USA       | NA                  | 2006 | guinea fowl         | CY028576 | A/Guinea fowl/New York/8391-1/2006(H7N2)            |
| 248            | NS1                  | H7N3    | USA       | NA                  | 2007 | northern pintail    | FJ520225 | A/northern pintail/California/44387-486/2007(H11N9) |
| 249            | NS1                  | H7N2    | USA       | NA                  | 2005 | chicken             | CY034842 | A/chicken/New York/10508/2005(H7N2)                 |
| 250            | NS1                  | H7N2    | USA       | NA                  | 2005 | chicken             | CY031751 | A/chicken/New York/31621-9/2005(H7N2)               |
| 251            | NS1                  | H7N2    | USA       | NA                  | 2005 | chicken             | CY022833 | A/chicken/New York/21211-2/2005(H7N2)               |
| 252            | NS1                  | H7N2    | USA       | NA                  | 2005 | chukar              | CY022769 | A/chukar/New York/11653-1/2005(H7N2)                |
| 253            | NS1                  | H7N2    | USA       | NA                  | 2005 | chicken             | CY022817 | A/chicken/New York/16326-5/2005(H7N2)               |
| 254            | NS1                  | H7N3    | USA       | NA                  | 2006 | shorebird           | EU030972 | A/shorebird/Delaware/22/06(H7N3)                    |
| 255            | NS1                  | H7N7    | USA       | NA                  | 1927 | fowl                | CY014995 | A/fowl/Dobson/1927(H7N7)                            |
| 256            | NS1                  | H7N7    | USA       | NA                  | 2007 | mallard             | CY033384 | A/mallard/California/HKWF1971/2007(H7N7)            |
| 257            | NS1                  | H7N2    | USA       | NA                  | 1997 | chicken             | EU742965 | A/chicken/PA/19241/1997(H7N2)                       |
| 258            | NS1                  | H7N3    | USA       | NA                  | 2006 | laughing gull       | CY037083 | A/laughing gull/Delaware Bay/6/2006(H7N3)           |
| 1              | PA                   | H7N7    | Australia | A                   | 1976 | duck                |          | A/duck/Victoria/76(H7N7)                            |
| 2              | PA                   | H7N6    | Australia | A                   | 2007 | duck                |          | A/duck/Victoria/512/2007(H7N6)                      |
| 3              | PA                   | H7N3    | Australia | A                   | 1994 | chicken             | CY022690 | A/chicken/Queensland/1994(H7N3)                     |
| 4              | PA                   | H7N4    | Australia | A                   | 1997 | chicken             | CY022698 | A/chicken/New South Wales/2/1997(H7N4)              |
| 5              | PA                   | H7N7    | Australia | A                   | 1985 | starling            | CY024783 | A/starling/Victoria/1985(H7N7)                      |
| 6              | PA                   | H7N4    | Australia | A                   | 1997 | chicken             | CY022706 | A/chicken/New South Wales/327/1997(H7N4)            |
| 7              | PA                   | H7N7    | Australia | A                   | 1976 | chicken             | CY024791 | A/chicken/Victoria/1976(H7N7)                       |
| 8              | PA                   | H7N7    | Australia | A                   | 1985 | chicken             | CY025074 | A/chicken/Victoria/1/1985(H7N7)                     |
| 9              | PA                   | H7N3    | Australia | A                   | 1992 | chicken             | CY025082 | A/chicken/Victoria/224/1992(H7N3)                   |
| 10             | PA                   | H7N4    | Australia | A                   | 1997 | emu                 | CY022714 | A/emu/New South Wales/775/1997(H7N4)                |
| 11             | PA                   | H7N2    | Australia | A                   | 2007 | duck                | CY033166 | A/duck/Tasmania/277/2007(H7N2)                      |
| 12             | PA                   | H7N3    | Bolivia   | SA                  | 2001 | cinnamon teal       | DQ525416 | A/cinnamon teal/Bolivia/4537/2001(H7N3)             |
| 13             | PA                   | H7N3    | Canada    | NA                  | 2001 | mallard             | DQ017508 | A/mallard/Alberta/24/01(H7N3)                       |
| 14             | PA                   | H7N5    | Canada    | NA                  | 1977 | mallard duck        | CY005013 | A/mallard duck/ALB/224/1977(H7N5)                   |
| 15             | PA                   | H7N3    | Canada    | NA                  | 1985 | green winged teal   | CY005055 | A/green-winged teal/ALB/228/1985(H7N3)              |
| 16             | PA                   | H7N3    | Canada    | NA                  | 2004 | chicken             | AY616764 | A/chicken/British Columbia/04(H7N3)                 |
| 17             | PA                   | H7N3    | Canada    | NA                  | 2007 | American black duck | EU500851 | A/American black duck/NB/2538/2007(H7N3)            |
| 18             | PA                   | H7N3    | Canada    | NA                  | 2004 | chicken             | AY648292 | A/GSC_chicken_B/British Columbia/04(H7N3)           |
| 19             | PA                   | H7N3    | Canada    | NA                  | 1985 | mallard duck        | CY005062 | A/mallard duck/Alberta/435/1985(H7N3)               |
| 20             | PA                   | H7N3    | Canada    | NA                  | 2001 | mallard             | DQ017512 | A/mallard/Alberta/24/01(H7N3)                       |
| 21             | PA                   | H7N3    | Canada    | NA                  | 2007 | chicken             | EU500859 | A/chicken/SK/HR-00011/2007(H7N3)                    |
| 22             | PA                   | H7N1    | Canada    | NA                  | 2001 | mallard             | CY014589 | A/mallard/Alberta/34/2001(H7N1)                     |
| 23             | PA                   | H7N3    | Canada    | NA                  | 1977 | blue winged teal    | CY005020 | A/blue-winged teal/ALB/295/1977(H7N3)               |
| 24             | PA                   | H7N3    | Canada    | NA                  | 2004 | chicken             | AY646083 | A/chicken/British Columbia/GSC_human_B/04(H7N3)     |
| 25             | PA                   | H7N2    | Canada    | NA                  | 1978 | blue winged teal    | CY005036 | A/blue-winged teal/ALB/221/1978(H7N2)               |
| 26             | PA                   | H7N3    | Canada    | NA                  | 2007 | Canada goose        | EU500843 | A/Canada goose/BC/3752/2007(H7N3)                   |
| 27             | PA                   | H7N3    | Chile     | SA                  | 2002 | chicken             | AY303660 | A/chicken/Chile/176822/02(H7N3)                     |
| 28             | PA                   | H7N3    | Chile     | SA                  | 2002 | chicken             | CY015031 | A/chicken/Chile/184240-4322/2002(H7N3)              |
| 29             | PA                   | H7N3    | Chile     | SA                  | 2002 | chicken             | AY303661 | A/chicken/Chile/4957/02(H7N3)                       |
| 30             | PA                   | H7N1    | China     | E                   | 1992 | duck                | CY005498 | A/duck/Nanchang/1904/1992(H7N1)                     |
| 31             | PA                   | H7N2    | China     | E                   | 2002 | chicken             | AY724260 | A/chicken/Hebei/1/2002(H7N2)                        |
| 32             | PA                   | H7N1    | Germany   | E                   | 1934 | chicken             | CY015051 | A/chicken/Rostock/45/1934(H7N1)                     |
| 33             | PA                   | H7N7    | Germany   | E                   | 1979 | goose               | CY015044 | A/goose/Leipzig/187-7/1979(H7N7)                    |
| 34             | PA                   | H7N1    | Germany   | E                   | 1934 | chicken             | X17223   | A/chicken/Rostock/8/1934(H7N1)                      |
| 35             | PA                   | H7N7    | Germany   | E                   | 2003 | chicken             | AJ619677 | A/chicken/Germany/R28/03(H7N7)                      |
| 36             | PA                   | H7N2    | Hong Kong | E                   | 1978 | duck                | CY005622 | A/duck/Hong Kong/293/1978(H7N2)                     |
| 37             | PA                   | H7N1    | Italy     | E                   | 1999 | turkey              | CY021410 | A/turkey/Italy/4580/1999(H7N1)                      |
| 38             | PA                   | H7N1    | Italy     | E                   | 1999 | turkey              | CY005793 | A/turkey/Italy/4169/1999(H7N1)                      |
| 39             | PA                   | H7N1    | Italy     | E                   | 1999 | turkey              | CY005788 | A/turkey/Italy/3620/1999(H7N1)                      |
| 40             | PA                   | H7N1    | Italy     | E                   | 1999 | turkey              | CY024759 | A/turkey/Italy/977/1999(H7N1)                       |
| 41             | PA                   | H7N3    | Italy     | E                   | 2003 | turkey              | CY020594 | A/turkey/Italy/251/2003(H7N3)                       |
| 42             | PA                   | H7N1    | Italy     | E                   | 1999 | turkey              | CY024895 | A/turkey/Italy/3488/1999(H7N1)                      |
| 43             | PA                   | H7N1    | Italy     | E                   | 1999 | turkey              | CY024871 | A/turkey/Italy/4482/1999(H7N1)                      |



| # <sup>1</sup> | Protein <sup>2</sup> | Subtype | country     | Region <sup>3</sup> | Year | Animal           | GenBank  | Virus name                                  |
|----------------|----------------------|---------|-------------|---------------------|------|------------------|----------|---------------------------------------------|
| 44             | PA                   | H7N1    | Italy       | E                   | 2000 | chicken          | CY024767 | A/chicken/Italy/2335/2000(H7N1)             |
| 45             | PA                   | H7N1    | Italy       | E                   | 2000 | quail            | CY022674 | A/quail/Italy/396/2000(H7N1)                |
| 46             | PA                   | H7N2    | Italy       | E                   | 2003 | quail            | CY021514 | A/quail/Italy/4610/2003(H7N2)               |
| 47             | PA                   | H7N1    | Italy       | E                   | 2000 | turkey           | CY021538 | A/turkey/Italy/2984/2000(H7N1)              |
| 48             | PA                   | H7N1    | Italy       | E                   | 1999 | turkey           | CY025178 | A/turkey/Italy/2715/1999(H7N1)              |
| 49             | PA                   | H7N1    | Italy       | E                   | 1999 | turkey           | CY025162 | A/turkey/Italy/3489/1999(H7N1)              |
| 50             | PA                   | H7N1    | Italy       | E                   | 1999 | chicken          | DQ991327 | A/chicken/Italy/5093/99(H7N1)               |
| 51             | PA                   | H7N3    | Italy       | E                   | 2004 | turkey           | CY028681 | A/turkey/Italy/3829/2004(H7N3)              |
| 52             | PA                   | H7N3    | Italy       | E                   | 2003 | chicken          | CY034755 | A/chicken/Italy/682/2003(H7N3)              |
| 53             | PA                   | H7N1    | Italy       | E                   | 2002 | mallard          | EU158155 | A/mallard/Italy/250/02(H7N1)                |
| 54             | PA                   | H7N2    | Italy       | E                   | 2003 | duck             | CY031033 | A/duck/Italy/4609/2003(H7N2)                |
| 55             | PA                   | H7N1    | Italy       | E                   | 2001 | chicken          | CY021554 | A/chicken/Italy/322/2001(H7N1)              |
| 56             | PA                   | H7N3    | Italy       | E                   | 2003 | turkey           | CY021490 | A/turkey/Italy/4608/2003(H7N3)              |
| 57             | PA                   | H7N3    | Italy       | E                   | 2003 | turkey           | CY022618 | A/turkey/Italy/2043/2003(H7N3)              |
| 58             | PA                   | H7N1    | Italy       | E                   | 1999 | turkey           | CY021418 | A/turkey/Italy/3675/1999(H7N1)              |
| 59             | PA                   | H7N3    | Italy       | E                   | 2003 | turkey           | CY021370 | A/turkey/Italy/1010/2003(H7N3)              |
| 60             | PA                   | H7N3    | Italy       | E                   | 2003 | turkey           | CY021362 | A/turkey/Italy/3620/2003(H7N3)              |
| 61             | PA                   | H7N1    | Italy       | E                   | 1999 | turkey           | CY024879 | A/turkey/Italy/4295/1999(H7N1)              |
| 62             | PA                   | H7N1    | Italy       | E                   | 2000 | turkey           | CY024775 | A/turkey/Italy/1084/2000(H7N1)              |
| 63             | PA                   | H7N1    | Italy       | E                   | 1999 | turkey           | CY024863 | A/turkey/Italy/4708/1999(H7N1)              |
| 64             | PA                   | H7N3    | Italy       | E                   | 2004 | turkey           | CY020602 | A/turkey/Italy/3807/2004(H7N3)              |
| 65             | PA                   | H7N1    | Italy       | E                   | 2000 | ostrich          | CY020690 | A/ostrich/Italy/1038/2000(H7N1)             |
| 66             | PA                   | H7N3    | Italy       | E                   | 2002 | turkey           | CY024743 | A/turkey/Italy/8000/2002(H7N3)              |
| 67             | PA                   | H7N7    | Italy       | E                   | 1902 | chicken          | CY015057 | A/chicken/Brescia/1902(H7N7)                |
| 68             | PA                   | H7N1    | Italy       | E                   | 1999 | turkey           | CY025114 | A/turkey/Italy/4644/1999(H7N1)              |
| 69             | PA                   | H7N1    | Italy       | E                   | 1999 | turkey           | CY025170 | A/turkey/Italy/3560/1999(H7N1)              |
| 70             | PA                   | H7N1    | Italy       | E                   | 1999 | turkey           | CY025146 | A/turkey/Italy/4617/1999(H7N1)              |
| 71             | PA                   | H7N1    | Italy       | E                   | 2000 | ostrich          | DQ991335 | A/ostrich/Italy/984/00(H7N1)                |
| 72             | PA                   | H7N3    | Italy       | E                   | 2004 | turkey           | CY020586 | A/turkey/Italy/4479/2004(H7N3)              |
| 73             | PA                   | H7N3    | Italy       | E                   | 2002 | turkey           | CY020610 | A/turkey/Italy/8912/2002(H7N3)              |
| 74             | PA                   | H7N1    | Italy       | E                   | 1999 | turkey           | CY024887 | A/turkey/Italy/3185/1999(H7N1)              |
| 75             | PA                   | H7N1    | Italy       | E                   | 1999 | chicken          | CY022682 | A/chicken/Italy/1082/99(H7N1)               |
| 76             | PA                   | H7N1    | Italy       | E                   | 2000 | turkey           | CY021546 | A/turkey/Italy/4426/2000(H7N1)              |
| 77             | PA                   | H7N1    | Italy       | E                   | 2000 | guinea fowl      | CY022666 | A/guinea fowl/Italy/155/2000(H7N1)          |
| 78             | PA                   | H7N1    | Italy       | E                   | 2001 | turkey           | CY021426 | A/turkey/Italy/1351/2001(H7N1)              |
| 79             | PA                   | H7N1    | Italy       | E                   | 1999 | turkey           | CY025186 | A/turkey/Italy/2732/1999(H7N1)              |
| 80             | PA                   | H7N1    | Italy       | E                   | 2000 | pekin duck       | CY024903 | A/pekin duck/Italy/1848/2000(H7N1)          |
| 81             | PA                   | H7N1    | Italy       | E                   | 2000 | chicken          | CY015018 | A/chicken/Italy/1285/2000(H7N1)             |
| 82             | PA                   | H7N1    | Italy       | E                   | 2000 | ostrich          | DQ991303 | A/ostrich/Italy/2332/00(H7N1)               |
| 83             | PA                   | H7N1    | Italy       | E                   | 1999 | chicken          | DQ991319 | A/chicken/Italy/5093/99(H7N1)               |
| 84             | PA                   | H7N3    | Italy       | E                   | 2002 | turkey           | CY029910 | A/turkey/Italy/8535/2002(H7N3)              |
| 85             | PA                   | H7N3    | Italy       | E                   | 2003 | turkey           | CY021498 | A/turkey/Italy/2987/2003(H7N3)              |
| 86             | PA                   | H7N1    | Italy       | E                   | 2000 | duck             | CY021562 | A/duck/Italy/551/2000(H7N1)                 |
| 87             | PA                   | H7N1    | Italy       | E                   | 2000 | ostrich          | DQ991342 | A/ostrich/Italy/984/00(H7N1)                |
| 88             | PA                   | H7N1    | Italy       | E                   | 2000 | ostrich          | DQ991311 | A/ostrich/Italy/2332/00(H7N1)               |
| 89             | PA                   | H7N3    | Italy       | E                   | 2004 | turkey           | CY029918 | A/turkey/Italy/4130/2004(H7N3)              |
| 90             | PA                   | H7N1    | Italy       | E                   | 1999 | turkey           | CY025194 | A/turkey/Italy/1265/1999(H7N1)              |
| 91             | PA                   | H7N3    | Italy       | E                   | 2003 | turkey           | CY028673 | A/turkey/Italy/2685/2003(H7N3)              |
| 92             | PA                   | H7N1    | Mongolia    | E                   | 2002 | duck             | AB473542 | A/duck/Mongolia/867/2002(H7N1)              |
| 93             | PA                   | H7N1    | Mongolia    | E                   | 2001 | duck             | AB268553 | A/duck/Mongolia/47/2001(H7N1)               |
| 94             | PA                   | H7N8    | Netherlands | E                   | 2006 | mallard          | CY041415 | A/mallard/Netherlands/33/2006(H7N8)         |
| 95             | PA                   | H7N7    | Netherlands | E                   | 2003 | chicken          | AY342420 | A/chicken/Netherlands/1/03(H7N7)            |
| 96             | PA                   | H7N7    | Netherlands | E                   | 2003 | chicken          | EF015556 | A/chicken/Netherlands/03010132/03(H7N7)     |
| 97             | PA                   | H7N3    | Netherlands | E                   | 2000 | mallard          | CY005849 | A/mallard/Netherlands/12/2000(H7N3)         |
| 98             | PA                   | H7N7    | New Zealand | NZ                  | 2005 | duck             |          | A/duck/New Zealand/2005(H7N7)               |
| 99             | PA                   | H7N3    | Pakistan    | E                   | 1995 | chicken          | CY035830 | A/chicken/Pakistan/34668/1995(H7N3)         |
| 100            | PA                   | H7N3    | Pakistan    | E                   | 1998 | chicken          | CY037753 | A/chicken/Pakistan/c1998/1998(H7N3)         |
| 101            | PA                   | H7N3    | Pakistan    | E                   | 2002 | chicken          | CY035838 | A/chicken/Rawalpindi/NARC72/2002(H7N3)      |
| 102            | PA                   | H7N3    | Pakistan    | E                   | 1995 | chicken          | CY015037 | A/chicken/Pakistan/34669/1995(H7N3)         |
| 103            | PA                   | H7N1    | UK          | E                   | 1979 | African starling | AY724254 | A/African starling/England-Q/983/1979(H7N1) |
| 104            | PA                   | H7N3    | UK          | E                   | 1963 | turkey           | CY015070 | A/turkey/England/1963(H7N3)                 |
| 105            | PA                   | H7N2    | USA         | NA                  | 2001 | chicken          | EU084911 | A/chicken/NY/119256-7/2001(H7N2)            |
| 106            | PA                   | H7N3    | USA         | NA                  | 1999 | chicken          | EU084929 | A/Chicken/NY/14714-2/1999(H7N3)             |
| 107            | PA                   | H7N7    | USA         | NA                  | 1988 | ruddy turnstone  | CY005076 | A/ruddy turnstone/DE/2378/1988(H7N7)        |
| 108            | PA                   | H7N2    | USA         | NA                  | 1995 | chicken          | EU742954 | A/chicken/NY/13833-7/1995(H7N2)             |
| 109            | PA                   | H7N2    | USA         | NA                  | 2005 | duck             | CY037044 | A/duck/New York/88291-12/2005(H7N2)         |
| 110            | PA                   | H7N2    | USA         | NA                  | 2002 | turkey           | EU743263 | A/turkey/VA/158512/2002(H7N2)               |
| 111            | PA                   | H7N3    | USA         | NA                  | 2006 | laughing gull    | EU030983 | A/laughing gull/Delaware/42/06(H7N3)        |
| 112            | PA                   | H7N3    | USA         | NA                  | 1995 | turkey           | EU980471 | A/turkey/Utah/24721-10/1995(H7N3)           |
| 113            | PA                   | H7N2    | USA         | NA                  | 2005 | muscovy duck     | CY031712 | A/Muscovy duck/New York/23164-10/2005(H7N2) |
| 114            | PA                   | H7N2    | USA         | NA                  | 1994 | turkey           | EU980462 | A/turkey/NY/4450-5/1994(H7N2)               |

| # <sup>1</sup> | Protein <sup>2</sup> | Subtype | country | Region <sup>3</sup> | Year | Animal            | GenBank  | Virus name                                         |
|----------------|----------------------|---------|---------|---------------------|------|-------------------|----------|----------------------------------------------------|
| 115            | PA                   | H7N2    | USA     | NA                  | 2005 | guinea fowl       | CY034835 | A/Guinea fowl/New York/101276-1/2005(H7N2)         |
| 116            | PA                   | H7N2    | USA     | NA                  | 2005 | muscovy duck      | CY034795 | A/Muscovy duck/New York/87493-3/2005(H7N2)         |
| 117            | PA                   | H7N2    | USA     | NA                  | 2005 | turkey            | CY034899 | A/turkey/New York/122501-2/2005(H7N2)              |
| 118            | PA                   | H7N2    | USA     | NA                  | 2005 | chicken           | CY034803 | A/chicken/New York/88291-8/2005(H7N2)              |
| 119            | PA                   | H7N2    | USA     | NA                  | 2005 | muscovy duck      | CY034851 | A/Muscovy duck/New York/11646-4/2005(H7N2)         |
| 120            | PA                   | H7N2    | USA     | NA                  | 2006 | chicken           | CY034907 | A/chicken/New York/19495-2/2006(H7N2)              |
| 121            | PA                   | H7N2    | USA     | NA                  | 2006 | guinea fowl       | CY028601 | A/Guinea fowl/New York/19501-4/2006(H7N2)          |
| 122            | PA                   | H7N2    | USA     | NA                  | 2006 | chicken           | CY028633 | A/chicken/New York/29047-4/2006(H7N2)              |
| 123            | PA                   | H7N2    | USA     | NA                  | 2006 | chicken           | CY028585 | A/chicken/New York/8391-2/2006(H7N2)               |
| 124            | PA                   | H7N2    | USA     | NA                  | 2005 | chicken           | CY034251 | A/chicken/New York/19499/2005(H7N2)                |
| 125            | PA                   | H7N2    | USA     | NA                  | 1999 | chicken           | EU742980 | A/chicken/NJ/16224-6/1999(H7N2)                    |
| 126            | PA                   | H7N1    | USA     | NA                  | 1993 | rhea              | EU742878 | A/rhea/North Carolina/39482/1993(H7N1)             |
| 127            | PA                   | H7N2    | USA     | NA                  | 2001 | chicken           | EU182287 | A/chicken/PA/143586/2001(H7N2)                     |
| 128            | PA                   | H7N2    | USA     | NA                  | 2005 | chicken           | CY031121 | A/chicken/New York/30732-6/2005(H7N2)              |
| 129            | PA                   | H7N2    | USA     | NA                  | 2005 | chukar            | CY031073 | A/chukar/New York/23164-13/2005(H7N2)              |
| 130            | PA                   | H7N2    | USA     | NA                  | 2005 | chicken           | CY031233 | A/chicken/New York/23164-6/2005(H7N2)              |
| 131            | PA                   | H7N3    | USA     | NA                  | 2006 | laughing gull     | CY037092 | A/laughing gull/Delaware Bay/46/2006(H7N3)         |
| 132            | PA                   | H7N3    | USA     | NA                  | 2006 | ruddy turnstone   | CY037108 | A/ruddy turnstone/Delaware Bay/283/2006(H7N3)      |
| 133            | PA                   | H7N2    | USA     | NA                  | 2006 | chicken           | CY036015 | A/chicken/New York/19499-1/2006(H7N2)              |
| 134            | PA                   | H7N2    | USA     | NA                  | 2005 | quail             | CY034395 | A/quail/New York/89641/2005(H7N2)                  |
| 135            | PA                   | H7N2    | USA     | NA                  | 2005 | chicken           | CY034307 | A/chicken/New York/23165-10/2005(H7N2)             |
| 136            | PA                   | H7N2    | USA     | NA                  | 2001 | chicken           | CY036395 | A/chicken/New Jersey/Sg-00380/2001(H7N2)           |
| 137            | PA                   | H7N2    | USA     | NA                  | 2001 | chicken           | CY036391 | A/chicken/New Jersey/Sg-00379/2001(H7N2)           |
| 138            | PA                   | H7N2    | USA     | NA                  | 2001 | chicken           | CY036411 | A/chicken/New York/Sg-00384/2001(H7N2)             |
| 139            | PA                   | H7N2    | USA     | NA                  | 2002 | guinea fowl       | CY036435 | A/guinea fowl/Massachusetts/Sg-00390/2002(H7N2)    |
| 140            | PA                   | H7N2    | USA     | NA                  | 2003 | chicken           | CY036537 | A/chicken/New York/Sg-00416/2003(H7N2)             |
| 141            | PA                   | H7N2    | USA     | NA                  | 2004 | chicken           | CY036599 | A/chicken/New York/Sg-00432/2004(H7N2)             |
| 142            | PA                   | H7N2    | USA     | NA                  | 2005 | chicken           | CY036634 | A/chicken/New Jersey/Sg-00441/2005(H7N2)           |
| 143            | PA                   | H7N3    | USA     | NA                  | 2007 | northern shoveler | CY039579 | A/northern shoveler/California/HKWF1026/2007(H7N3) |
| 144            | PA                   | H7N2    | USA     | NA                  | 2004 | chicken           | CY036611 | A/chicken/New Jersey/Sg-00435/2004(H7N2)           |
| 145            | PA                   | H7N2    | USA     | NA                  | 2004 | chicken           | CY036587 | A/chicken/New Jersey/Sg-00429/2004(H7N2)           |
| 146            | PA                   | H7N2    | USA     | NA                  | 2002 | chicken           | CY036443 | A/chicken/New Jersey/Sg-00392/2002(H7N2)           |
| 147            | PA                   | H7N2    | USA     | NA                  | 2001 | chicken           | CY036419 | A/chicken/New York/Sg-00386/2001(H7N2)             |
| 148            | PA                   | H7N2    | USA     | NA                  | 2004 | chicken           | CY036607 | A/chicken/New Jersey/Sg-00434/2004(H7N2)           |
| 149            | PA                   | H7N2    | USA     | NA                  | 2005 | chicken           | CY036627 | A/chicken/New Jersey/Sg-00439/2005(H7N2)           |
| 150            | PA                   | H7N2    | USA     | NA                  | 2001 | guinea fowl       | CY036403 | A/guinea fowl/New Jersey/Sg-00382/2001(H7N2)       |
| 151            | PA                   | H7N2    | USA     | NA                  | 1997 | chicken           | EU742966 | A/chicken/PA/19241/1997(H7N2)                      |
| 152            | PA                   | H7N3    | USA     | NA                  | 2006 | shorebird         | CY041327 | A/shorebird/Delaware Bay/332/2006(H7N3)            |
| 153            | PA                   | H7N2    | USA     | NA                  | 2005 | chicken           | CY031081 | A/chicken/New York/23165-6/2005(H7N2)              |
| 154            | PA                   | H7N7    | USA     | NA                  | 2007 | mallard           | CY033379 | A/mallard/California/HKWF1971/2007(H7N7)           |
| 155            | PA                   | H7N2    | USA     | NA                  | 2006 | muscovy duck      | CY036007 | A/Muscovy duck/New York/19495-7/2006(H7N2)         |
| 156            | PA                   | H7N2    | USA     | NA                  | 2005 | chicken           | CY034843 | A/chicken/New York/10508/2005(H7N2)                |
| 157            | PA                   | H7N2    | USA     | NA                  | 1995 | emu               | EU980458 | A/emu/TX/25414/1995(H7N2)                          |
| 158            | PA                   | H7N2    | USA     | NA                  | 2005 | guinea fowl       | CY031680 | A/Guinea fowl/New York/23164-3-05/2005(H7N2)       |
| 159            | PA                   | H7N2    | USA     | NA                  | 2006 | guinea fowl       | CY028577 | A/Guinea fowl/New York/8391-1/2006(H7N2)           |
| 160            | PA                   | H7N3    | USA     | NA                  | 1994 | chicken           | EU743016 | A/chicken/New Jersey/15086-3/1994(H7N3)            |
| 161            | PA                   | H7N2    | USA     | NA                  | 2002 | guinea hen        | EU742975 | A/guinea hen/MA/14801-11/2002(H7N2)                |
| 162            | PA                   | H7N2    | USA     | NA                  | 2005 | guinea fowl       | CY031768 | A/Guinea fowl/New York/37982-3/2005(H7N2)          |
| 163            | PA                   | H7N2    | USA     | NA                  | 1995 | turkey            | EU182295 | A/turkey/NY/13820-3/1995(H7N2)                     |
| 164            | PA                   | H7N2    | USA     | NA                  | 2005 | chicken           | CY033206 | A/chicken/New York/22067-8/2005(H7N2)              |
| 165            | PA                   | H7N2    | USA     | NA                  | 2005 | chicken           | CY031752 | A/chicken/New York/31621-9/2005(H7N2)              |
| 166            | PA                   | H7N2    | USA     | NA                  | 2005 | chicken           | CY022818 | A/chicken/New York/16326-5/2005(H7N2)              |
| 167            | PA                   | H7N2    | USA     | NA                  | 2005 | chicken           | CY022834 | A/chicken/New York/21211-2/2005(H7N2)              |
| 168            | PA                   | H7N2    | USA     | NA                  | 1997 | chicken           | EU742945 | A/chicken/PA/11767/1997(H7N2)                      |
| 169            | PA                   | H7N2    | USA     | NA                  | 1997 | chicken           | EU742935 | A/chicken/NY/8030-2/1997(H7N2)                     |
| 170            | PA                   | H7N3    | USA     | NA                  | 2001 | black duck        | CY020890 | A/Black Duck/Ohio/415/2001(H7N3)                   |
| 171            | PA                   | H7N3    | USA     | NA                  | 2005 | mallard           | CY021642 | A/mallard/Delaware/418/2005(H7N3)                  |
| 172            | PA                   | H7N2    | USA     | NA                  | 2001 | avian             | EU026099 | A/avian/NY/118353-1/2001(H7N2)                     |
| 173            | PA                   | H7N9    | USA     | NA                  | 2006 | blue winged teal  | CY024823 | A/blue-winged teal/Ohio/566/2006(H7N9)             |
| 174            | PA                   | H7N2    | USA     | NA                  | 2006 | chicken           | CY028545 | A/chicken/New York/3181-5/2006(H7N2)               |
| 175            | PA                   | H7N2    | USA     | NA                  | 2006 | chicken           | CY034915 | A/chicken/New York/19495-3/2006(H7N2)              |
| 176            | PA                   | H7N2    | USA     | NA                  | 2005 | guinea fowl       | CY035927 | A/Guinea fowl/New York/88291-9/2005(H7N2)          |
| 177            | PA                   | H7N2    | USA     | NA                  | 2006 | guinea fowl       | CY035999 | A/Guinea fowl/New York/19495-6/2006(H7N2)          |
| 178            | PA                   | H7N3    | USA     | NA                  | 2006 | shorebird         | CY036772 | A/shorebird/Delaware Bay/560/2006(H7N3)            |
| 179            | PA                   | H7N2    | USA     | NA                  | 2005 | duck              | CY034811 | A/duck/New York/98616-4/2005(H7N2)                 |
| 180            | PA                   | H7N3    | USA     | NA                  | 2007 | ruddy turnstone   | CY036780 | A/ruddy turnstone/Delaware Bay/108/2007(H7N3)      |
| 181            | PA                   | H7N2    | USA     | NA                  | 2005 | chicken           | CY037020 | A/chicken/New York/63806-11/2005(H7N2)             |
| 182            | PA                   | H7N3    | USA     | NA                  | 2001 | duck              | EU743012 | A/duck/PA/143585/2001(H7N3)                        |
| 183            | PA                   | H7N2    | USA     | NA                  | 2001 | guinea fowl       | EU742917 | A/guinea fowl/NJ/119063-8/2001(H7N2)               |
| 184            | PA                   | H7N2    | USA     | NA                  | 2005 | guinea fowl       | CY031225 | A/Guinea fowl/New York/10196-7/2005(H7N2)          |
| 185            | PA                   | H7N2    | USA     | NA                  | 2005 | chicken           | CY031217 | A/chicken/New York/10196-6/2005(H7N2)              |

| # <sup>1</sup> | Protein <sup>2</sup> | Subtype | country   | Region <sup>3</sup> | Year | Animal            | GenBank  | Virus name                                         |
|----------------|----------------------|---------|-----------|---------------------|------|-------------------|----------|----------------------------------------------------|
| 186            | PA                   | H7N2    | USA       | NA                  | 2005 | guinea fowl       | CY028512 | A/Guinea fowl/New York/143646-3/2005(H7N2)         |
| 187            | PA                   | H7N2    | USA       | NA                  | 2005 | chicken           | CY036623 | A/chicken/New York/Sg-00438/2005(H7N2)             |
| 188            | PA                   | H7N2    | USA       | NA                  | 2005 | chicken           | CY031640 | A/chicken/New York/22067-7/2005(H7N2)              |
| 189            | PA                   | H7N2    | USA       | NA                  | 2005 | chicken           | CY036638 | A/chicken/New York/Sg-00342/2005(H7N2)             |
| 190            | PA                   | H7N2    | USA       | NA                  | 1999 | chicken           | FJ517328 | A/chicken/NY/21586-8/1999(H7N2)                    |
| 191            | PA                   | H7N3    | USA       | NA                  | 2008 | green winged teal | CY039539 | A/green winged teal/California/AKS1370/2008(H7N3)  |
| 192            | PA                   | H7N2    | USA       | NA                  | 2004 | chicken           | CY036603 | A/chicken/New York/Sg-00433/2004(H7N2)             |
| 193            | PA                   | H7N2    | USA       | NA                  | 2001 | chicken           | CY036399 | A/chicken/New York/Sg-00381/2001(H7N2)             |
| 194            | PA                   | H7N2    | USA       | NA                  | 2005 | chicken           | CY033310 | A/chicken/New York/63806-8/2005(H7N2)              |
| 195            | PA                   | H7N2    | USA       | NA                  | 2000 | chicken           | EU742984 | A/chicken/NJ/30739-6/2000(H7N2)                    |
| 196            | PA                   | H7N2    | USA       | NA                  | 1994 | chicken           | EU742949 | A/chicken/NY/13142-5/1994(H7N2)                    |
| 197            | PA                   | H7N2    | USA       | NA                  | 2005 | chicken           | CY033302 | A/chicken/New York/37982-4/2005(H7N2)              |
| 198            | PA                   | H7N2    | USA       | NA                  | 1998 | quail             | EU742921 | A/quail/NY/13989-51/1998(H7N2)                     |
| 199            | PA                   | H7N3    | USA       | NA                  | 1985 | ruddy turnstone   | CY004410 | A/ruddy turnstone/New Jersey/65/1985(H7N3)         |
| 200            | PA                   | H7N3    | USA       | NA                  | 2006 | shorebird         | EU030967 | A/shorebird/Delaware/22/06(H7N3)                   |
| 201            | PA                   | H7N2    | USA       | NA                  | 1995 | guinea fowl       | CY014841 | A/guinea fowl/New York/13820-3/1995(H7N2)          |
| 202            | PA                   | H7N2    | USA       | NA                  | 2004 | chicken           | EU743258 | A/chicken/NJ/294508-12/2004(H7N2)                  |
| 203            | PA                   | H7N2    | USA       | NA                  | 2002 | chicken           | EU742971 | A/chicken/PA/149092-1/2002(H7N2)                   |
| 204            | PA                   | H7N2    | USA       | NA                  | 1995 | chicken           | EU182291 | A/chicken/NY/3112-1/1995(H7N2)                     |
| 205            | PA                   | H7N7    | USA       | NA                  | 1989 | red knot          | CY005083 | A/red knot/NJ/325/1989(H7N7)                       |
| 206            | PA                   | H7N3    | USA       | NA                  | 1998 | Mallard           | CY016193 | A/Mallard/Ohio/322/1998(H7N3)                      |
| 207            | PA                   | H7N2    | USA       | NA                  | 2005 | chukar            | CY022770 | A/chukar/New York/11653-1/2005(H7N2)               |
| 208            | PA                   | H7N3    | USA       | NA                  | 1980 | pheasant          | CY005893 | A/pheasant/Minnesota/917/1980(H7N3)                |
| 209            | PA                   | H7N2    | USA       | NA                  | 2005 | duck              | CY034819 | A/duck/New York/98616-5/2005(H7N2)                 |
| 210            | PA                   | H7N2    | USA       | NA                  | 1996 | chicken           | EU980466 | A/chicken/NY/3202-7/1996(H7N2)                     |
| 211            | PA                   | H7N2    | USA       | NA                  | 2005 | quail             | CY033318 | A/quail/New York/63806-13/2005(H7N2)               |
| 212            | PA                   | H7N2    | USA       | NA                  | 2006 | guinea fowl       | CY034243 | A/Guinea fowl/New York/32084/2006(H7N2)            |
| 213            | PA                   | H7N2    | USA       | NA                  | 2006 | chicken           | CY035991 | A/chicken/New York/19495-4/2006(H7N2)              |
| 214            | PA                   | H7N3    | USA       | NA                  | 2007 | ruddy turnstone   | CY036788 | A/ruddy turnstone/Delaware Bay/121/2007(H7N3)      |
| 215            | PA                   | H7N2    | USA       | NA                  | 2003 | chicken           | EU743000 | A/chicken/CT/260413-2/2003(H7N2)                   |
| 216            | PA                   | H7N2    | USA       | NA                  | 2005 | guinea fowl       | CY031656 | A/Guinea fowl/New York/22071/2005(H7N2)            |
| 217            | PA                   | H7N2    | USA       | NA                  | 2005 | chicken           | CY031648 | A/chicken/New York/22067-12/2005(H7N2)             |
| 218            | PA                   | H7N2    | USA       | NA                  | 2005 | chicken           | CY031688 | A/chicken/New York/23164-5/2005(H7N2)              |
| 219            | PA                   | H7N2    | USA       | NA                  | 2002 | turkey            | EU982305 | A/turkey/VA/55/2002(H7N2)                          |
| 220            | PA                   | H7N2    | USA       | NA                  | 1998 | goose             | EU743270 | A/goose/NY/8600-3/1998(H7N2)                       |
| 221            | PA                   | H7N2    | USA       | NA                  | 1997 | chicken           | EU742930 | A/chicken/PA/7777-1/1997(H7N2)                     |
| 222            | PA                   | H7N2    | USA       | NA                  | 1995 | chicken           | EU742940 | A/chicken/RI/4328-1/1995(H7N2)                     |
| 223            | PA                   | H7N2    | USA       | NA                  | 1995 | chicken           | EU182299 | A/chicken/NY/19542-5/1995(H7N2)                    |
| 224            | PA                   | H7N2    | USA       | NA                  | 2005 | chicken           | CY022826 | A/chicken/New York/16330/2005(H7N2)                |
| 225            | PA                   | H7N2    | USA       | NA                  | 2005 | chicken           | CY033238 | A/chicken/New York/30732-8/2005(H7N2)              |
| 226            | PA                   | H7N2    | USA       | NA                  | 2005 | guinea fowl       | CY031728 | A/Guinea fowl/New York/23165-12/2005(H7N2)         |
| 227            | PA                   | H7N2    | USA       | NA                  | 2005 | chicken           | CY031776 | A/chicken/New York/42217/2005(H7N2)                |
| 228            | PA                   | H7N7    | USA       | NA                  | 1927 | fowl              | CY014996 | A/fowl/Dobson/1927(H7N7)                           |
| 229            | PA                   | H7N3    | USA       | NA                  | 1980 | turkey            | CY014783 | A/turkey/Minnesota/1200/1980(H7N3)                 |
| 230            | PA                   | H7N9    | USA       | NA                  | 1988 | turkey            | CY014791 | A/turkey/Minnesota/1/1988(H7N9)                    |
| 231            | PA                   | H7N2    | USA       | NA                  | 1998 | quail             | EU742958 | A/quail/PA/20304/1998(H7N2)                        |
| 232            | PA                   | H7N2    | USA       | NA                  | 1998 | chicken           | EU742925 | A/chicken/PA/13552-1/1998(H7N2)                    |
| 233            | PA                   | H7N3    | USA       | NA                  | 2004 | blue winged teal  | CY018906 | A/blue-winged teal/Ohio/658/2004(H7N3)             |
| 234            | PA                   | H7N2    | USA       | NA                  | 2000 | chicken           | EU084905 | A/chicken/NY/30749-3/2000(H7N2)                    |
| 235            | PA                   | H7N2    | USA       | NA                  | 2001 | chicken           | EU084915 | A/chicken/NJ/118878-5/2001(H7N2)                   |
| 236            | PA                   | H7N2    | USA       | NA                  | 1997 | chicken           | EU084918 | A/chicken/NY/6777-3/1997(H7N2)                     |
| 237            | PA                   | H7N2    | USA       | NA                  | 1997 | turkey            | EU084922 | A/turkey/PA/7975/1997(H7N2)                        |
| 238            | PA                   | H7N2    | USA       | NA                  | 1994 | chicken           | EU084925 | A/chicken/NY/4447-7/1994(H7N2)                     |
| 239            | PA                   | H7N3    | USA       | NA                  | 1971 | turkey            | DQ870887 | A/turkey/Oregon/1971(H7N3)                         |
| 240            | PA                   | H7N8    | USA       | NA                  | 1987 | mallard           | CY021626 | A/mallard/Ohio/421/1987(H7N8)                      |
| 241            | PA                   | H7N2    | USA       | NA                  | 2001 | chicken           | EU742893 | A/chicken/FL/90348-4/2001(H7N2)                    |
| 242            | PA                   | H7N2    | USA       | NA                  | 2005 | chicken           | CY037052 | A/chicken/New York/88291-14/2005(H7N2)             |
| 243            | PA                   | H7N2    | USA       | NA                  | 2005 | guinea fowl       | CY037068 | A/Guinea fowl/New York/98616-3/2005(H7N2)          |
| 244            | PA                   | H7N3    | USA       | NA                  | 2008 | northern shoveler | CY039595 | A/northern shoveler/California/HKWF2031/2008(H7N3) |
| 245            | PA                   | H7N2    | USA       | NA                  | 2005 | chicken           | CY034371 | A/chicken/New York/88291-11/2005(H7N2)             |
| 246            | PA                   | H7N2    | USA       | NA                  | 2005 | chicken           | CY034347 | A/chicken/New York/63806-12/2005(H7N2)             |
| 247            | PA                   | H7N2    | USA       | NA                  | 2005 | chicken           | CY034363 | A/chicken/New York/88291-6/2005(H7N2)              |
| 248            | PA                   | H7N2    | USA       | NA                  | 2001 | chicken           | CY036407 | A/chicken/New York/Sg-00383/2001(H7N2)             |
| 249            | PA                   | H7N2    | USA       | NA                  | 2002 | guinea fowl       | CY036439 | A/guinea fowl/New Jersey/Sg-00391/2002(H7N2)       |
| 250            | PA                   | H7N2    | USA       | NA                  | 2004 | chicken           | CY036595 | A/chicken/New Jersey/Sg-00431/2004(H7N2)           |
| 251            | PA                   | H7N2    | USA       | NA                  | 2004 | chicken           | CY036556 | A/chicken/New Jersey/Sg-00421/2004(H7N2)           |
| 252            | PA                   | H7N2    | USA       | NA                  | 2000 | chicken           | CY036292 | A/chicken/New York/Sg-00352/2000(H7N2)             |
| 1              | PB1                  | H7N7    | Australia | A                   | 1985 | starling          | CY024784 | A/starling/Victoria/85(H7N7)                       |
| 2              | PB1                  | H7N7    | Australia | A                   | 1985 | chicken           | CY025075 | A/chicken/Victoria/1/85(H7N7)                      |
| 3              | PB1                  | H7N7    | Australia | A                   | 1976 | duck              |          | A/duck/Victoria/76(H7N7)                           |

| #1 | Protein <sup>2</sup> | Subtype | country   | Region <sup>3</sup> | Year | Animal              | GenBank  | Virus name                                      |
|----|----------------------|---------|-----------|---------------------|------|---------------------|----------|-------------------------------------------------|
| 4  | PB1                  | H7N6    | Australia | A                   | 2007 | duck                |          | A/duck/Victoria/512/2007(H7N6)                  |
| 5  | PB1                  | H7N3    | Australia | A                   | 1994 | chicken             | CY022691 | A/chicken/Queensland/1994(H7N3)                 |
| 6  | PB1                  | H7N4    | Australia | A                   | 1997 | chicken             | CY022699 | A/chicken/New South Wales/2/1997(H7N4)          |
| 7  | PB1                  | H7N4    | Australia | A                   | 1997 | chicken             | CY022707 | A/chicken/New South Wales/327/1997(H7N4)        |
| 8  | PB1                  | H7N7    | Australia | A                   | 1976 | chicken             | CY024792 | A/chicken/Victoria/1976(H7N7)                   |
| 9  | PB1                  | H7N3    | Australia | A                   | 1992 | chicken             | CY025083 | A/chicken/Victoria/224/1992(H7N3)               |
| 10 | PB1                  | H7N4    | Australia | A                   | 1997 | emu                 | CY022715 | A/emu/New South Wales/775/1997(H7N4)            |
| 11 | PB1                  | H7N2    | Australia | A                   | 2007 | duck                | CY033167 | A/duck/Tasmania/277/2007(H7N2)                  |
| 12 | PB1                  | H7N3    | Canada    | NA                  | 1985 | green winged teal   | CY005056 | A/green-winged teal/ALB/228/1985(H7N3)          |
| 13 | PB1                  | H7N3    | Canada    | NA                  | 1977 | blue winged teal    | CY005021 | A/blue-winged teal/ALB/435/1977(H7N3)           |
| 14 | PB1                  | H7N8    | Canada    | NA                  | 1979 | pintail duck        | CY005042 | A/pintail duck/Alberta/121/1979(H7N8)           |
| 15 | PB1                  | H7N3    | Canada    | NA                  | 1976 | mallard duck        | CY004328 | A/mallard duck/ALB/48/1976(H7N3)                |
| 16 | PB1                  | H7N3    | Canada    | NA                  | 2007 | American black duck | EU500850 | A/American black duck/NB/2538/2007(H7N3)        |
| 17 | PB1                  | H7N3    | Canada    | NA                  | 2001 | mallard             | CY004331 | A/mallard/Alberta/27/2001(H7N3)                 |
| 18 | PB1                  | H7N3    | Canada    | NA                  | 2001 | mallard             | DQ017511 | A/mallard/Alberta/24/01(H7N3)                   |
| 19 | PB1                  | H7N3    | Canada    | NA                  | 2004 | chicken             | AY648293 | A/GSC_chicken_B/British Columbia/04(H7N3)       |
| 20 | PB1                  | H7N2    | Canada    | NA                  | 1978 | blue winged teal    | CY005037 | A/blue-winged teal/ALB/221/1978(H7N2)           |
| 21 | PB1                  | H7N3    | Canada    | NA                  | 1985 | mallard duck        | CY005063 | A/mallard duck/Alberta/435/1985(H7N3)           |
| 22 | PB1                  | H7N3    | Canada    | NA                  | 2007 | chicken             | EU500858 | A/chicken/SK/HR-00011/2007(H7N3)                |
| 23 | PB1                  | H7N3    | Canada    | NA                  | 2007 | Canada goose        | EU500842 | A/Canada goose/BC/3752/2007(H7N3)               |
| 24 | PB1                  | H7N3    | Canada    | NA                  | 2004 | chicken             | AY616765 | A/chicken/British Columbia/04(H7N3)             |
| 25 | PB1                  | H7N3    | Canada    | NA                  | 2004 | chicken             | AY646084 | A/chicken/British Columbia/GSC_human_B/04(H7N3) |
| 26 | PB1                  | H7N5    | Canada    | NA                  | 1977 | mallard duck        | CY005014 | A/mallard duck/ALB/224/1977(H7N5)               |
| 27 | PB1                  | H7N3    | Canada    | NA                  | 2001 | mallard             | DQ017507 | A/mallard/Alberta/24/01(H7N3)                   |
| 28 | PB1                  | H7N3    | Canada    | NA                  | 2004 | chicken             | AY653039 | A/GSC_chicken/British Columbia/04(H7N3)         |
| 29 | PB1                  | H7N3    | Chile     | SA                  | 2002 | chicken             | CY015032 | A/chicken/Chile/184240-4322/2002(H7N3)          |
| 30 | PB1                  | H7N3    | Chile     | SA                  | 2002 | chicken             | AY303663 | A/chicken/Chile/176822/02(H7N3)                 |
| 31 | PB1                  | H7N2    | China     | E                   | 2002 | chicken             | AY724261 | A/chicken/Hebei/1/2002(H7N2)                    |
| 32 | PB1                  | H7N1    | China     | E                   | 1992 | duck                | CY005499 | A/duck/Nanchang/1904/1992(H7N1)                 |
| 33 | PB1                  | H7N7    | China     | E                   | 2003 | duck                | EU158166 | A/duck/Jiangxi/1742/03(H7N7)                    |
| 34 | PB1                  | H7N7    | China     | E                   | 2003 | duck                | EU158168 | A/duck/Jiangxi/1786/03(H7N7)                    |
| 35 | PB1                  | H7N7    | Germany   | E                   | 2003 | chicken             | AJ620348 | A/chicken/Germany/R28/03(H7N7)                  |
| 36 | PB1                  | H7N1    | Germany   | E                   | 1934 | chicken             | CY015052 | A/chicken/Rostock/45/1934(H7N1)                 |
| 37 | PB1                  | H7N7    | Germany   | E                   | 1979 | goose               | CY015045 | A/goose/Leipzig/187-7/1979(H7N7)                |
| 38 | PB1                  | H7N2    | Hong Kong | E                   | 1978 | duck                | CY005623 | A/duck/Hong Kong/293/1978(H7N2)                 |
| 39 | PB1                  | H7N3    | Italy     | E                   | 2003 | turkey              | CY021363 | A/turkey/Italy/3620/2003(H7N3)                  |
| 40 | PB1                  | H7N1    | Italy     | E                   | 2001 | turkey              | CY021427 | A/turkey/Italy/1351/2001(H7N1)                  |
| 41 | PB1                  | H7N1    | Italy     | E                   | 1999 | turkey              | CY024888 | A/turkey/Italy/3185/1999(H7N1)                  |
| 42 | PB1                  | H7N1    | Italy     | E                   | 1999 | turkey              | CY024872 | A/turkey/Italy/4482/1999(H7N1)                  |
| 43 | PB1                  | H7N3    | Italy     | E                   | 2002 | turkey              | CY020611 | A/turkey/Italy/8912/2002(H7N3)                  |
| 44 | PB1                  | H7N3    | Italy     | E                   | 2004 | turkey              | CY020587 | A/turkey/Italy/4479/2004(H7N3)                  |
| 45 | PB1                  | H7N1    | Italy     | E                   | 2000 | guinea fowl         | CY022667 | A/guinea fowl/Italy/155/2000(H7N1)              |
| 46 | PB1                  | H7N1    | Italy     | E                   | 2000 | quail               | CY022675 | A/quail/Italy/396/2000(H7N1)                    |
| 47 | PB1                  | H7N1    | Italy     | E                   | 2000 | turkey              | CY021547 | A/turkey/Italy/4426/2000(H7N1)                  |
| 48 | PB1                  | H7N1    | Italy     | E                   | 2000 | duck                | CY021563 | A/duck/Italy/551/2000(H7N1)                     |
| 49 | PB1                  | H7N1    | Italy     | E                   | 2000 | ostrich             | DQ991302 | A/ostrich/Italy/2332/00(H7N1)                   |
| 50 | PB1                  | H7N3    | Italy     | E                   | 2002 | turkey              | CY029911 | A/turkey/Italy/8535/2002(H7N3)                  |
| 51 | PB1                  | H7N1    | Italy     | E                   | 1999 | turkey              | CY025139 | A/turkey/Italy/4294/1999(H7N1)                  |
| 52 | PB1                  | H7N1    | Italy     | E                   | 1999 | turkey              | CY025179 | A/turkey/Italy/2715/1999(H7N1)                  |
| 53 | PB1                  | H7N1    | Italy     | E                   | 1999 | turkey              | CY025187 | A/turkey/Italy/2732/1999(H7N1)                  |
| 54 | PB1                  | H7N1    | Italy     | E                   | 2000 | pekin duck          | CY024904 | A/pekin duck/Italy/1848/2000(H7N1)              |
| 55 | PB1                  | H7N3    | Italy     | E                   | 2004 | turkey              | CY028690 | A/turkey/Italy/3477/2004(H7N3)                  |
| 56 | PB1                  | H7N2    | Italy     | E                   | 2003 | duck                | CY031034 | A/duck/Italy/4609/2003(H7N2)                    |
| 57 | PB1                  | H7N3    | Italy     | E                   | 2003 | turkey              | EU158167 | A/turkey/Italy/121964/03(H7N3)                  |
| 58 | PB1                  | H7N3    | Italy     | E                   | 2004 | turkey              | CY020603 | A/turkey/Italy/3807/2004(H7N3)                  |
| 59 | PB1                  | H7N3    | Italy     | E                   | 2004 | quail               | CY020619 | A/quail/Italy/3347/2004(H7N3)                   |
| 60 | PB1                  | H7N3    | Italy     | E                   | 2003 | turkey              | CY021371 | A/turkey/Italy/1010/2003(H7N3)                  |
| 61 | PB1                  | H7N1    | Italy     | E                   | 2001 | chicken             | CY021555 | A/chicken/Italy/322/2001(H7N1)                  |
| 62 | PB1                  | H7N1    | Italy     | E                   | 1999 | chicken             | CY022683 | A/chicken/Italy/1082/99(H7N1)                   |
| 63 | PB1                  | H7N3    | Italy     | E                   | 2004 | turkey              | CY029919 | A/turkey/Italy/4130/2004(H7N3)                  |
| 64 | PB1                  | H7N1    | Italy     | E                   | 1999 | turkey              | CY025115 | A/turkey/Italy/4644/1999(H7N1)                  |
| 65 | PB1                  | H7N1    | Italy     | E                   | 1999 | turkey              | CY025171 | A/turkey/Italy/3560/1999(H7N1)                  |
| 66 | PB1                  | H7N3    | Italy     | E                   | 2003 | turkey              | CY028674 | A/turkey/Italy/2685/2003(H7N3)                  |
| 67 | PB1                  | H7N3    | Italy     | E                   | 2003 | chicken             | CY034756 | A/chicken/Italy/682/2003(H7N3)                  |
| 68 | PB1                  | H7N3    | Italy     | E                   | 2002 | turkey              | CY024744 | A/turkey/Italy/8000/2002(H7N3)                  |
| 69 | PB1                  | H7N1    | Italy     | E                   | 1999 | turkey              | CY024760 | A/turkey/Italy/977/1999(H7N1)                   |
| 70 | PB1                  | H7N3    | Italy     | E                   | 2003 | turkey              | CY021491 | A/turkey/Italy/4608/2003(H7N3)                  |
| 71 | PB1                  | H7N3    | Italy     | E                   | 2003 | turkey              | CY022619 | A/turkey/Italy/2043/2003(H7N3)                  |
| 72 | PB1                  | H7N1    | Italy     | E                   | 1999 | turkey              | CY021419 | A/turkey/Italy/3675/1999(H7N1)                  |
| 73 | PB1                  | H7N1    | Italy     | E                   | 1999 | chicken             | DQ991318 | A/chicken/Italy/5093/99(H7N1)                   |

| # <sup>1</sup> | Protein <sup>2</sup> | Subtype | country     | Region <sup>3</sup> | Year | Animal           | GenBank  | Virus name                                   |
|----------------|----------------------|---------|-------------|---------------------|------|------------------|----------|----------------------------------------------|
| 74             | PB1                  | H7N1    | Italy       | E                   | 2000 | ostrich          | DQ991334 | A/ostrich/Italy/984/00(H7N1)                 |
| 75             | PB1                  | H7N1    | Italy       | E                   | 2000 | ostrich          | DQ991341 | A/ostrich/Italy/984/00(H7N1)                 |
| 76             | PB1                  | H7N1    | Italy       | E                   | 2000 | chicken          | CY015019 | A/chicken/Italy/1285/2000(H7N1)              |
| 77             | PB1                  | H7N1    | Italy       | E                   | 1999 | turkey           | CY025163 | A/turkey/Italy/3489/1999(H7N1)               |
| 78             | PB1                  | H7N1    | Italy       | E                   | 2000 | chicken          | CY024768 | A/chicken/Italy/2335/2000(H7N1)              |
| 79             | PB1                  | H7N3    | Italy       | E                   | 2003 | turkey           | CY020595 | A/turkey/Italy/251/2003(H7N3)                |
| 80             | PB1                  | H7N1    | Italy       | E                   | 1999 | turkey           | CY024896 | A/turkey/Italy/3488/1999(H7N1)               |
| 81             | PB1                  | H7N1    | Italy       | E                   | 1999 | turkey           | CY021411 | A/turkey/Italy/4580/1999(H7N1)               |
| 82             | PB1                  | H7N1    | Italy       | E                   | 1999 | turkey           | CY005794 | A/turkey/Italy/4169/1999(H7N1)               |
| 83             | PB1                  | H7N1    | Italy       | E                   | 1999 | chicken          | CY022659 | A/chicken/Italy/4746/1999(H7N1)              |
| 84             | PB1                  | H7N3    | Italy       | E                   | 2003 | turkey           | CY021499 | A/turkey/Italy/2987/2003(H7N3)               |
| 85             | PB1                  | H7N2    | Italy       | E                   | 2003 | quail            | CY021515 | A/quail/Italy/4610/2003(H7N2)                |
| 86             | PB1                  | H7N1    | Italy       | E                   | 2000 | turkey           | CY021539 | A/turkey/Italy/2984/2000(H7N1)               |
| 87             | PB1                  | H7N1    | Italy       | E                   | 1999 | turkey           | CY025195 | A/turkey/Italy/1265/1999(H7N1)               |
| 88             | PB1                  | H7N1    | Italy       | E                   | 1999 | chicken          | DQ991326 | A/chicken/Italy/5093/99(H7N1)                |
| 89             | PB1                  | H7N3    | Italy       | E                   | 2004 | turkey           | CY028682 | A/turkey/Italy/3829/2004(H7N3)               |
| 90             | PB1                  | H7N3    | Italy       | E                   | 2003 | turkey           | EU158162 | A/turkey/Italy/68819/03(H7N3)                |
| 91             | PB1                  | H7N1    | Mongolia    | E                   | 2001 | duck             | AB268552 | A/duck/Mongolia/47/2001(H7N1)                |
| 92             | PB1                  | H7N1    | Mongolia    | E                   | 2002 | duck             | AB473541 | A/duck/Mongolia/867/2002(H7N1)               |
| 93             | PB1                  | H7N7    | Netherlands | E                   | 2003 | chicken          | AY340085 | A/chicken/Netherlands/1/03(H7N7)             |
| 94             | PB1                  | H7N8    | Netherlands | E                   | 2006 | mallard          | CY041416 | A/mallard/Netherlands/33/2006(H7N8)          |
| 95             | PB1                  | H7N7    | Netherlands | E                   | 2003 | chicken          | EF015557 | A/chicken/Netherlands/03010132/03(H7N7)      |
| 96             | PB1                  | H7N3    | Netherlands | E                   | 2000 | mallard          | CY005850 | A/mallard/Netherlands/12/2000(H7N3)          |
| 97             | PB1                  | H7N7    | New Zealand | NZ                  | 2005 | duck             |          | A/duck/New Zealand/2005(H7N7)                |
| 98             | PB1                  | H7N3    | Pakistan    | E                   | 1995 | chicken          | CY015038 | A/chicken/Pakistan/34669/1995(H7N3)          |
| 99             | PB1                  | H7N3    | Pakistan    | E                   | 1995 | chicken          | CY035829 | A/chicken/Pakistan/34668/1995(H7N3)          |
| 100            | PB1                  | H7N3    | Pakistan    | E                   | 2002 | chicken          | CY035821 | A/chicken/Rawalpindi/NARC68/2002(H7N3)       |
| 101            | PB1                  | H7N3    | Pakistan    | E                   | 1998 | chicken          | CY037752 | A/chicken/Pakistan/c1998/1998(H7N3)          |
| 102            | PB1                  | H7N3    | Pakistan    | E                   | 2002 | chicken          | CY035837 | A/chicken/Rawalpindi/NARC72/2002(H7N3)       |
| 103            | PB1                  | H7N1    | UK          | E                   | 1979 | African starling | AY724255 | A/African starling/England-Q/983/1979(H7N1)  |
| 104            | PB1                  | H7N3    | UK          | E                   | 1963 | turkey           | CY015071 | A/turkey/England/1963(H7N3)                  |
| 105            | PB1                  | H7N2    | USA         | NA                  | 2005 | turkey           | CY034900 | A/turkey/New York/122501-2/2005(H7N2)        |
| 106            | PB1                  | H7N3    | USA         | NA                  | 2006 | shorebird        | CY036773 | A/shorebird/Delaware Bay/560/2006(H7N3)      |
| 107            | PB1                  | H7N2    | USA         | NA                  | 2006 | chicken          | CY034916 | A/chicken/New York/19495-3/2006(H7N2)        |
| 108            | PB1                  | H7N2    | USA         | NA                  | 2006 | chicken          | CY028634 | A/chicken/New York/29047-4/2006(H7N2)        |
| 109            | PB1                  | H7N2    | USA         | NA                  | 2005 | chicken          | CY031705 | A/chicken/New York/23164-9/2005(H7N2)        |
| 110            | PB1                  | H7N2    | USA         | NA                  | 2005 | guinea fowl      | CY031681 | A/Guinea fowl/New York/23164-3-05/2005(H7N2) |
| 111            | PB1                  | H7N2    | USA         | NA                  | 1997 | chicken          | EU742946 | A/chicken/PA/11767/1997(H7N2)                |
| 112            | PB1                  | H7N2    | USA         | NA                  | 2004 | chicken          | EU743259 | A/chicken/NJ/294508-12/2004(H7N2)            |
| 113            | PB1                  | H7N3    | USA         | NA                  | 2006 | laughing gull    | EU030981 | A/laughing gull/Delaware/42/06(H7N3)         |
| 114            | PB1                  | H7N2    | USA         | NA                  | 1995 | guinea fowl      | CY014842 | A/guinea fowl/New York/13820-3/1995(H7N2)    |
| 115            | PB1                  | H7N2    | USA         | NA                  | 2002 | chicken          | CY014899 | A/chicken/Pennsylvania/143586/2002(H7N2)     |
| 116            | PB1                  | H7N3    | USA         | NA                  | 1985 | ruddy turnstone  | CY004411 | A/ruddy turnstone/New Jersey/65/1985(H7N3)   |
| 117            | PB1                  | H7N2    | USA         | NA                  | 1998 | quail            | EU742922 | A/quail/NY/13989-51/1998(H7N2)               |
| 118            | PB1                  | H7N3    | USA         | NA                  | 1994 | chicken          | EU743017 | A/chicken/New Jersey/15086-3/1994(H7N3)      |
| 119            | PB1                  | H7N2    | USA         | NA                  | 2005 | chicken          | CY022835 | A/chicken/New York/21211-2/2005(H7N2)        |
| 120            | PB1                  | H7N2    | USA         | NA                  | 1995 | chicken          | EU182290 | A/chicken/NY/3112-1/1995(H7N2)               |
| 121            | PB1                  | H7N3    | USA         | NA                  | 2004 | blue-winged teal | CY018907 | A/blue-winged teal/Ohio/658/2004(H7N3)       |
| 122            | PB1                  | H7N3    | USA         | NA                  | 1980 | pheasant         | CY005894 | A/pheasant/Minnesota/917/1980(H7N3)          |
| 123            | PB1                  | H7N2    | USA         | NA                  | 2005 | chukar           | CY022771 | A/chukar/New York/11653-1/2005(H7N2)         |
| 124            | PB1                  | H7N2    | USA         | NA                  | 2005 | guinea fowl      | CY031226 | A/Guinea fowl/New York/10196-7/2005(H7N2)    |
| 125            | PB1                  | H7N2    | USA         | NA                  | 2005 | chicken          | CY031082 | A/chicken/New York/23165-6/2005(H7N2)        |
| 126            | PB1                  | H7N2    | USA         | NA                  | 2005 | guinea fowl      | CY028513 | A/Guinea fowl/New York/143646-3/2005(H7N2)   |
| 127            | PB1                  | H7N2    | USA         | NA                  | 2006 | chicken          | CY028546 | A/chicken/New York/3181-5/2006(H7N2)         |
| 128            | PB1                  | H7N2    | USA         | NA                  | 2001 | guinea fowl      | EU742918 | A/guinea fowl/NJ/119063-8/2001(H7N2)         |
| 129            | PB1                  | H7N2    | USA         | NA                  | 1997 | chicken          | EU742967 | A/chicken/PA/19241/1997(H7N2)                |
| 130            | PB1                  | H7N2    | USA         | NA                  | 2005 | chicken          | CY037021 | A/chicken/New York/63806-11/2005(H7N2)       |
| 131            | PB1                  | H7N3    | USA         | NA                  | 2006 | laughing gull    | CY037085 | A/laughing gull/Delaware Bay/6/2006(H7N3)    |
| 132            | PB1                  | H7N2    | USA         | NA                  | 2001 | chicken          | EU084910 | A/chicken/NY/119256-7/2001(H7N2)             |
| 133            | PB1                  | H7N2    | USA         | NA                  | 1997 | chicken          | EU084917 | A/chicken/NY/6777-3/1997(H7N2)               |
| 134            | PB1                  | H7N2    | USA         | NA                  | 1994 | chicken          | EU084924 | A/chicken/NY/4447-7/1994(H7N2)               |
| 135            | PB1                  | H7N8    | USA         | NA                  | 1987 | mallard          | CY021627 | A/mallard/Ohio/421/1987(H7N8)                |
| 136            | PB1                  | H7N2    | USA         | NA                  | 2005 | chicken          | CY022827 | A/chicken/New York/16330/2005(H7N2)          |
| 137            | PB1                  | H7N2    | USA         | NA                  | 2006 | chicken          | CY028586 | A/chicken/New York/8391-2/2006(H7N2)         |
| 138            | PB1                  | H7N2    | USA         | NA                  | 2001 | avian            | EU026100 | A/avian/NY/118353-1/2001(H7N2)               |
| 139            | PB1                  | H7N2    | USA         | NA                  | 2005 | chicken          | CY031689 | A/chicken/New York/23164-5/2005(H7N2)        |
| 140            | PB1                  | H7N2    | USA         | NA                  | 2005 | duck             | CY034380 | A/duck/New York/88291-13/2005(H7N2)          |
| 141            | PB1                  | H7N2    | USA         | NA                  | 2005 | quail            | CY034396 | A/quail/New York/89641/2005(H7N2)            |
| 142            | PB1                  | H7N2    | USA         | NA                  | 2005 | chicken          | CY034308 | A/chicken/New York/23165-10/2005(H7N2)       |
| 143            | PB1                  | H7N2    | USA         | NA                  | 2005 | chicken          | CY034364 | A/chicken/New York/88291-6/2005(H7N2)        |
| 144            | PB1                  | H7N2    | USA         | NA                  | 1999 | chicken          | EU742981 | A/chicken/NJ/16224-6/1999(H7N2)              |

| # <sup>1</sup> | Protein <sup>2</sup> | Subtype | country | Region <sup>3</sup> | Year | Animal            | GenBank  | Virus name                                         |
|----------------|----------------------|---------|---------|---------------------|------|-------------------|----------|----------------------------------------------------|
| 145            | PB1                  | H7N2    | USA     | NA                  | 1998 | chicken           | EU742926 | A/chicken/PA/13552-1/1998(H7N2)                    |
| 146            | PB1                  | H7N2    | USA     | NA                  | 2006 | guinea fowl       | CY034244 | A/Guinea fowl/New York/32084/2006(H7N2)            |
| 147            | PB1                  | H7N2    | USA     | NA                  | 2005 | chicken           | CY034252 | A/chicken/New York/19499/2005(H7N2)                |
| 148            | PB1                  | H7N2    | USA     | NA                  | 1998 | quail             | EU742959 | A/quail/PA/20304/1998(H7N2)                        |
| 149            | PB1                  | H7N2    | USA     | NA                  | 1994 | chicken           | EU742950 | A/chicken/NY/13142-5/1994(H7N2)                    |
| 150            | PB1                  | H7N2    | USA     | NA                  | 2005 | chicken           | CY033239 | A/chicken/New York/30732-8/2005(H7N2)              |
| 151            | PB1                  | H7N2    | USA     | NA                  | 1995 | chicken           | EU742941 | A/chicken/RI/4328-1/1995(H7N2)                     |
| 152            | PB1                  | H7N2    | USA     | NA                  | 2002 | chicken           | EU742972 | A/chicken/PA/149092-1/2002(H7N2)                   |
| 153            | PB1                  | H7N2    | USA     | NA                  | 2005 | chicken           | CY033247 | A/chicken/New York/30732-9/2005(H7N2)              |
| 154            | PB1                  | H7N2    | USA     | NA                  | 2005 | guinea fowl       | CY031729 | A/Guinea fowl/New York/23165-12/2005(H7N2)         |
| 155            | PB1                  | H7N2    | USA     | NA                  | 1995 | chicken           | EU182298 | A/chicken/NY/19542-5/1995(H7N2)                    |
| 156            | PB1                  | H7N7    | USA     | NA                  | 1927 | fowl              | CY014997 | A/fowl/Dobson/1927(H7N7)                           |
| 157            | PB1                  | H7N2    | USA     | NA                  | 2005 | chicken           | CY029839 | A/chicken/New York/16326-4/2005(H7N2)              |
| 158            | PB1                  | H7N7    | USA     | NA                  | 2007 | mallard           | CY033378 | A/mallard/California/HKWF1971/2007(H7N7)           |
| 159            | PB1                  | H7N3    | USA     | NA                  | 2007 | ruddy turnstone   | CY036781 | A/ruddy turnstone/Delaware Bay/108/2007(H7N3)      |
| 160            | PB1                  | H7N2    | USA     | NA                  | 2005 | guinea fowl       | CY037069 | A/Guinea fowl/New York/98616-3/2005(H7N2)          |
| 161            | PB1                  | H7N2    | USA     | NA                  | 2005 | chicken           | CY037053 | A/chicken/New York/88291-14/2005(H7N2)             |
| 162            | PB1                  | H7N2    | USA     | NA                  | 2005 | guinea fowl       | CY034836 | A/Guinea fowl/New York/101276-1/2005(H7N2)         |
| 163            | PB1                  | H7N2    | USA     | NA                  | 1996 | chicken           | EU980467 | A/chicken/NY/3202-7/1996(H7N2)                     |
| 164            | PB1                  | H7N2    | USA     | NA                  | 2005 | chicken           | CY034844 | A/chicken/New York/10508/2005(H7N2)                |
| 165            | PB1                  | H7N2    | USA     | NA                  | 2005 | quail             | CY033319 | A/quail/New York/63806-13/2005(H7N2)               |
| 166            | PB1                  | H7N2    | USA     | NA                  | 2005 | turkey            | CY031721 | A/turkey/New York/23164-11/2005(H7N2)              |
| 167            | PB1                  | H7N2    | USA     | NA                  | 1995 | emu               | EU980459 | A/emu/TX/25414/1995(H7N2)                          |
| 168            | PB1                  | H7N2    | USA     | NA                  | 2006 | chicken           | CY035992 | A/chicken/New York/19495-4/2006(H7N2)              |
| 169            | PB1                  | H7N2    | USA     | NA                  | 2006 | guinea fowl       | CY036000 | A/Guinea fowl/New York/19495-6/2006(H7N2)          |
| 170            | PB1                  | H7N2    | USA     | NA                  | 2005 | guinea fowl       | CY031657 | A/Guinea fowl/New York/22071/2005(H7N2)            |
| 171            | PB1                  | H7N2    | USA     | NA                  | 2005 | chicken           | CY034348 | A/chicken/New York/63806-12/2005(H7N2)             |
| 172            | PB1                  | H7N2    | USA     | NA                  | 2005 | chicken           | CY034372 | A/chicken/New York/88291-11/2005(H7N2)             |
| 173            | PB1                  | H7N2    | USA     | NA                  | 2006 | guinea fowl       | CY028578 | A/Guinea fowl/New York/8391-1/2006(H7N2)           |
| 174            | PB1                  | H7N2    | USA     | NA                  | 1995 | turkey            | EU182294 | A/turkey/NY/13820-3/1995(H7N2)                     |
| 175            | PB1                  | H7N2    | USA     | NA                  | 2005 | chicken           | CY031753 | A/chicken/New York/31621-9/2005(H7N2)              |
| 176            | PB1                  | H7N2    | USA     | NA                  | 2005 | chicken           | CY031777 | A/chicken/New York/42217/2005(H7N2)                |
| 177            | PB1                  | H7N2    | USA     | NA                  | 1997 | chicken           | EU742936 | A/chicken/NY/8030-2/1997(H7N2)                     |
| 178            | PB1                  | H7N2    | USA     | NA                  | 1997 | chicken           | EU742931 | A/chicken/PA/7777-1/1997(H7N2)                     |
| 179            | PB1                  | H7N3    | USA     | NA                  | 1980 | turkey            | CY014784 | A/turkey/Minnesota/1200/1980(H7N3)                 |
| 180            | PB1                  | H7N3    | USA     | NA                  | 2001 | black duck        | CY020891 | A/Black Duck/Ohio/415/2001(H7N3)                   |
| 181            | PB1                  | H7N3    | USA     | NA                  | 2005 | mallard           | CY021643 | A/mallard/Delaware/418/2005(H7N3)                  |
| 182            | PB1                  | H7N3    | USA     | NA                  | 1971 | turkey            | DQ870886 | A/turkey/Oregon/1971(H7N3)                         |
| 183            | PB1                  | H7N2    | USA     | NA                  | 2000 | chicken           | EU084904 | A/chicken/NY/30749-3/2000(H7N2)                    |
| 184            | PB1                  | H7N2    | USA     | NA                  | 2001 | chicken           | EU084914 | A/chicken/NJ/118878-5/2001(H7N2)                   |
| 185            | PB1                  | H7N2    | USA     | NA                  | 1997 | turkey            | EU084921 | A/turkey/PA/7975/1997(H7N2)                        |
| 186            | PB1                  | H7N2    | USA     | NA                  | 2005 | chukar            | CY024848 | A/chukar/New York/21211-7/2005(H7N2)               |
| 187            | PB1                  | H7N9    | USA     | NA                  | 2006 | blue winged teal  | CY024824 | A/blue-winged teal/Ohio/566/2006(H7N9)             |
| 188            | PB1                  | H7N2    | USA     | NA                  | 2001 | chicken           | EU742894 | A/chicken/FL/90348-4/2001(H7N2)                    |
| 189            | PB1                  | H7N2    | USA     | NA                  | 2003 | chicken           | EU743001 | A/chicken/CT/260413-2/2003(H7N2)                   |
| 190            | PB1                  | H7N2    | USA     | NA                  | 2006 | chicken           | CY031194 | A/chicken/New York/46545-2/2006(H7N2)              |
| 191            | PB1                  | H7N2    | USA     | NA                  | 2005 | duck              | CY037045 | A/duck/New York/88291-12/2005(H7N2)                |
| 192            | PB1                  | H7N3    | USA     | NA                  | 2008 | northern shoveler | CY039594 | A/northern shoveler/California/HKWF2031/2008(H7N3) |
| 193            | PB1                  | H7N3    | USA     | NA                  | 2007 | northern shoveler | CY039578 | A/northern shoveler/California/HKWF1026/2007(H7N3) |
| 194            | PB1                  | H7N2    | USA     | NA                  | 1999 | chicken           | FJ517329 | A/chicken/NY/21586-8/1999(H7N2)                    |
| 195            | PB1                  | H7N3    | USA     | NA                  | 2008 | green winged teal | CY039538 | A/green winged teal/California/AKS1370/2008(H7N3)  |
| 196            | PB1                  | H7N2    | USA     | NA                  | 2005 | chicken           | CY037101 | A/chicken/New York/87493-2/2005(H7N2)              |
| 197            | PB1                  | H7N2    | USA     | NA                  | 2006 | chicken           | CY034908 | A/chicken/New York/19495-2/2006(H7N2)              |
| 198            | PB1                  | H7N2    | USA     | NA                  | 2005 | muscovy duck      | CY034852 | A/Muscovy duck/New York/11646-4/2005(H7N2)         |
| 199            | PB1                  | H7N2    | USA     | NA                  | 2005 | muscovy duck      | CY034796 | A/Muscovy duck/New York/87493-3/2005(H7N2)         |
| 200            | PB1                  | H7N2    | USA     | NA                  | 2005 | chicken           | CY034804 | A/chicken/New York/88291-8/2005(H7N2)              |
| 201            | PB1                  | H7N2    | USA     | NA                  | 2005 | duck              | CY034812 | A/duck/New York/98616-4/2005(H7N2)                 |
| 202            | PB1                  | H7N2    | USA     | NA                  | 1994 | turkey            | EU980463 | A/turkey/NY/4450-5/1994(H7N2)                      |
| 203            | PB1                  | H7N3    | USA     | NA                  | 1995 | turkey            | EU980472 | A/turkey/Utah/24721-10/1995(H7N3)                  |
| 204            | PB1                  | H7N2    | USA     | NA                  | 1995 | chicken           | EU742955 | A/chicken/NY/13833-7/1995(H7N2)                    |
| 205            | PB1                  | H7N2    | USA     | NA                  | 1998 | goose             | EU743271 | A/goose/NY/8600-3/1998(H7N2)                       |
| 206            | PB1                  | H7N3    | USA     | NA                  | 2001 | duck              | EU743013 | A/duck/PA/143585/2001(H7N3)                        |
| 207            | PB1                  | H7N2    | USA     | NA                  | 2002 | turkey            | EU743264 | A/turkey/VA/158512/2002(H7N2)                      |
| 208            | PB1                  | H7N9    | USA     | NA                  | 1988 | turkey            | CY014792 | A/turkey/Minnesota/1/1988(H7N9)                    |
| 209            | PB1                  | H7N3    | USA     | NA                  | 2006 | shorebird         | EU030965 | A/shorebird/Delaware/22/06(H7N3)                   |
| 210            | PB1                  | H7N2    | USA     | NA                  | 2005 | chicken           | CY031641 | A/chicken/New York/22067-7/2005(H7N2)              |
| 211            | PB1                  | H7N2    | USA     | NA                  | 2006 | guinea fowl       | CY028602 | A/Guinea fowl/New York/19501-4/2006(H7N2)          |
| 212            | PB1                  | H7N2    | USA     | NA                  | 2005 | chicken           | CY034196 | A/chicken/New York/143646-2/2005(H7N2)             |
| 213            | PB1                  | H7N1    | USA     | NA                  | 1993 | rhea              | EU742879 | A/rhea/North Carolina/39482/1993(H7N1)             |

| # <sup>1</sup> | Protein <sup>2</sup> | Subtype | country   | Region <sup>3</sup> | Year | Animal              | GenBank  | Virus name                                    |
|----------------|----------------------|---------|-----------|---------------------|------|---------------------|----------|-----------------------------------------------|
| 214            | PB1                  | H7N2    | USA       | NA                  | 2002 | guinea hen          | EU742976 | A/guinea hen/MA/14801-11/2002(H7N2)           |
| 215            | PB1                  | H7N2    | USA       | NA                  | 2000 | chicken             | EU742985 | A/chicken/NJ/30739-6/2000(H7N2)               |
| 216            | PB1                  | H7N2    | USA       | NA                  | 2005 | chicken             | CY033311 | A/chicken/New York/63806-8/2005(H7N2)         |
| 217            | PB1                  | H7N2    | USA       | NA                  | 2005 | chicken             | CY022819 | A/chicken/New York/16326-5/2005(H7N2)         |
| 218            | PB1                  | H7N3    | USA       | NA                  | 1999 | chicken             | EU084928 | A/Chicken/NY/14714-2/1999(H7N3)               |
| 219            | PB1                  | H7N2    | USA       | NA                  | 2005 | chicken             | CY024840 | A/chicken/New York/21211-1/2005(H7N2)         |
| 220            | PB1                  | H7N3    | USA       | NA                  | 1998 | Mallard             | CY016194 | A/Mallard/Ohio/322/1998(H7N3)                 |
| 221            | PB1                  | H7N7    | USA       | NA                  | 1988 | ruddy turnstone     | CY005077 | A/ruddy turnstone/DE/2378/1988(H7N7)          |
| 222            | PB1                  | H7N7    | USA       | NA                  | 1989 | red knot            | CY005084 | A/red knot/NJ/325/1989(H7N7)                  |
| 223            | PB1                  | H7N2    | USA       | NA                  | 2006 | chicken             | CY036016 | A/chicken/New York/19499-1/2006(H7N2)         |
| 224            | PB1                  | H7N2    | USA       | NA                  | 2005 | chukar              | CY031074 | A/chukar/New York/23164-13/2005(H7N2)         |
| 225            | PB1                  | H7N2    | USA       | NA                  | 2005 | chicken             | CY031122 | A/chicken/New York/30732-6/2005(H7N2)         |
| 226            | PB1                  | H7N2    | USA       | NA                  | 2005 | chicken             | CY031218 | A/chicken/New York/10196-6/2005(H7N2)         |
| 227            | PB1                  | H7N2    | USA       | NA                  | 2006 | muscovy duck        | CY036008 | A/Muscovy duck/New York/19495-7/2006(H7N2)    |
| 228            | PB1                  | H7N3    | USA       | NA                  | 2006 | ruddy turnstone     | CY037109 | A/ruddy turnstone/Delaware Bay/283/2006(H7N3) |
| 229            | PB1                  | H7N3    | USA       | NA                  | 2006 | laughing gull       | CY037093 | A/laughing gull/Delaware Bay/46/2006(H7N3)    |
| 1              | PB2                  | H7N4    | Australia | A                   | 1997 | chicken             | CY022708 | A/chicken/New South Wales/327/97(H7N4)        |
| 2              | PB2                  | H7N7    | Australia | A                   | 1985 | Chicken             | CY025076 | A/chicken/Victoria/1/85(H7N7)                 |
| 3              | PB2                  | H7N7    | Australia | A                   | 1976 | duck                |          | A/duck/Victoria/76(H7N7)                      |
| 4              | PB2                  | H7N6    | Australia | A                   | 2007 | duck                |          | A/duck/Victoria/512/2007 (H7N6)               |
| 5              | PB2                  | H7N3    | Australia | A                   | 1994 | chicken             | CY022692 | A/chicken/Queensland/1994(H7N3)               |
| 6              | PB2                  | H7N4    | Australia | A                   | 1997 | chicken             | CY022700 | A/chicken/New South Wales/2/1997(H7N4)        |
| 7              | PB2                  | H7N7    | Australia | A                   | 1985 | starling            | CY024785 | A/starling/Victoria/1985(H7N7)                |
| 8              | PB2                  | H7N7    | Australia | A                   | 1976 | chicken             | CY024793 | A/chicken/Victoria/1976(H7N7)                 |
| 9              | PB2                  | H7N3    | Australia | A                   | 1992 | chicken             | CY025084 | A/chicken/Victoria/224/1992(H7N3)             |
| 10             | PB2                  | H7N4    | Australia | A                   | 1997 | emu                 | CY022716 | A/emu/New South Wales/775/1997(H7N4)          |
| 11             | PB2                  | H7N2    | Australia | A                   | 2007 | duck                | CY033168 | A/duck/Tasmania/277/2007(H7N2)                |
| 12             | PB2                  | H7N3    | Bolivia   | SA                  | 2001 | cinnamon teal       | DQ525418 | A/cinnamon teal/Bolivia/4537/2001(H7N3)       |
| 13             | PB2                  | H7N2    | Canada    | NA                  | 1978 | blue winged teal    | CY005038 | A/blue-winged teal/ALB/221/1978(H7N2)         |
| 14             | PB2                  | H7N3    | Canada    | NA                  | 2004 | chicken             | AY616766 | A/chicken/British Columbia/04(H7N3)           |
| 15             | PB2                  | H7N3    | Canada    | NA                  | 2001 | mallard             | DQ017509 | A/mallard/Alberta/24/01(H7N3)                 |
| 16             | PB2                  | H7N3    | Canada    | NA                  | 2001 | mallard             | DQ017510 | A/mallard/Alberta/24/01(H7N3)                 |
| 17             | PB2                  | H7N3    | Canada    | NA                  | 2004 | chicken             | AY648294 | A/GSC_chicken_B/British Columbia/04(H7N3)     |
| 18             | PB2                  | H7N3    | Canada    | NA                  | 1985 | mallard duck        | CY005064 | A/mallard duck/Alberta/435/1985(H7N3)         |
| 19             | PB2                  | H7N5    | Canada    | NA                  | 1977 | mallard duck        | CY005015 | A/mallard duck/ALB/224/1977(H7N5)             |
| 20             | PB2                  | H7N3    | Canada    | NA                  | 2007 | Canada goose        | EU500841 | A/Canada goose/BC/3752/2007(H7N3)             |
| 21             | PB2                  | H7N3    | Canada    | NA                  | 2007 | chicken             | EU500857 | A/chicken/SK/HR-00011/2007(H7N3)              |
| 22             | PB2                  | H7N3    | Canada    | NA                  | 1977 | gadwall duck        | CY005034 | A/gadwall duck/Alberta/291/1977(H7N3)         |
| 23             | PB2                  | H7N8    | Canada    | NA                  | 1979 | pintail duck        | CY005043 | A/pintail duck/Alberta/121/1979(H7N8)         |
| 24             | PB2                  | H7N3    | Canada    | NA                  | 1985 | green winged teal   | CY005057 | A/green-winged teal/ALB/228/1985(H7N3)        |
| 25             | PB2                  | H7N1    | Canada    | NA                  | 2001 | mallard             | CY005098 | A/mallard/Alberta/34/2001(H7N1)               |
| 26             | PB2                  | H7N3    | Canada    | NA                  | 2004 | chicken             | AY650276 | A/GSC_chicken/British Columbia/04(H7N3)       |
| 27             | PB2                  | H7N3    | Canada    | NA                  | 2007 | American black duck | EU500849 | A/American black duck/NB/2538/2007(H7N3)      |
| 28             | PB2                  | H7N2    | China     | E                   | 2002 | chicken             | AY724251 | A/chicken/Hebei/1/2002(H7N2)                  |
| 29             | PB2                  | H7N1    | China     | E                   | 1992 | duck                | CY005500 | A/duck/Nanchang/1904/1992(H7N1)               |
| 30             | PB2                  | H7N7    | Germany   | E                   | 2003 | chicken             | AJ620347 | A/chicken/Germany/R28/03(H7N7)                |
| 31             | PB2                  | H7N1    | Germany   | E                   | 1934 | chicken             | M21851   | A/chicken/FPV/Rostock/1934(H7N1)              |
| 32             | PB2                  | H7N1    | Germany   | E                   | 1934 | chicken             | CY015053 | A/chicken/Rostock/45/1934(H7N1)               |
| 33             | PB2                  | H7N7    | Germany   | E                   | 1979 | goose               | CY015046 | A/goose/Leipzig/187-7/1979(H7N7)              |
| 34             | PB2                  | H7N2    | Hong Kong | E                   | 1978 | duck                | CY005624 | A/duck/Hong Kong/293/1978(H7N2)               |
| 35             | PB2                  | H7N1    | Italy     | E                   | 1999 | turkey              | CY021420 | A/turkey/Italy/3675/1999(H7N1)                |
| 36             | PB2                  | H7N7    | Italy     | E                   | 1902 | chicken             | CY015058 | A/chicken/Brescia/1902(H7N7)                  |
| 37             | PB2                  | H7N1    | Italy     | E                   | 2000 | chicken             | CY024769 | A/chicken/Italy/2335/2000(H7N1)               |
| 38             | PB2                  | H7N1    | Italy     | E                   | 2000 | guinea fowl         | CY022668 | A/guinea fowl/Italy/155/2000(H7N1)            |
| 39             | PB2                  | H7N3    | Italy     | E                   | 2003 | turkey              | CY021492 | A/turkey/Italy/4608/2003(H7N3)                |
| 40             | PB2                  | H7N1    | Italy     | E                   | 1999 | chicken             | DQ991325 | A/chicken/Italy/5093/99(H7N1)                 |
| 41             | PB2                  | H7N1    | Italy     | E                   | 1999 | turkey              | CY025188 | A/turkey/Italy/2732/1999(H7N1)                |
| 42             | PB2                  | H7N1    | Italy     | E                   | 2001 | chicken             | CY021556 | A/chicken/Italy/322/2001(H7N1)                |
| 43             | PB2                  | H7N1    | Italy     | E                   | 1999 | chicken             | CY022660 | A/chicken/Italy/4746/1999(H7N1)               |
| 44             | PB2                  | H7N1    | Italy     | E                   | 2001 | turkey              | CY021428 | A/turkey/Italy/1351/2001(H7N1)                |
| 45             | PB2                  | H7N3    | Italy     | E                   | 2003 | turkey              | CY021372 | A/turkey/Italy/1010/2003(H7N3)                |
| 46             | PB2                  | H7N1    | Italy     | E                   | 1999 | turkey              | CY024873 | A/turkey/Italy/4482/1999(H7N1)                |
| 47             | PB2                  | H7N1    | Italy     | E                   | 2000 | pekin duck          | CY024905 | A/pekin duck/Italy/1848/2000(H7N1)            |
| 48             | PB2                  | H7N3    | Italy     | E                   | 2004 | turkey              | CY020604 | A/turkey/Italy/3807/2004(H7N3)                |
| 49             | PB2                  | H7N1    | Italy     | E                   | 1999 | turkey              | CY024761 | A/turkey/Italy/977/1999(H7N1)                 |
| 50             | PB2                  | H7N1    | Italy     | E                   | 1999 | turkey              | CY025180 | A/turkey/Italy/2715/1999(H7N1)                |
| 51             | PB2                  | H7N1    | Italy     | E                   | 1999 | turkey              | CY025196 | A/turkey/Italy/1265/1999(H7N1)                |
| 52             | PB2                  | H7N1    | Italy     | E                   | 1999 | chicken             | DQ991317 | A/chicken/Italy/5093/99(H7N1)                 |
| 53             | PB2                  | H7N1    | Italy     | E                   | 2000 | ostrich             | DQ991340 | A/ostrich/Italy/984/00(H7N1)                  |
| 54             | PB2                  | H7N3    | Italy     | E                   | 2003 | turkey              | CY028675 | A/turkey/Italy/2685/2003(H7N3)                |
| 55             | PB2                  | H7N3    | Italy     | E                   | 2002 | turkey              | AJ627485 | A/turkey/Italy/214845/2002(H7N3)              |

| # <sup>1</sup> | Protein <sup>2</sup> | Subtype | country     | Region <sup>3</sup> | Year | Animal           | GenBank  | Virus name                                    |
|----------------|----------------------|---------|-------------|---------------------|------|------------------|----------|-----------------------------------------------|
| 56             | PB2                  | H7N1    | Italy       | E                   | 1999 | turkey           | AJ627487 | A/turkey/Italy/4603/1999(H7N1)                |
| 57             | PB2                  | H7N1    | Italy       | E                   | 2002 | mallard          | EU158170 | A/mallard/Italy/250/02(H7N1)                  |
| 58             | PB2                  | H7N3    | Italy       | E                   | 2004 | quail            | CY020620 | A/quail/Italy/3347/2004(H7N3)                 |
| 59             | PB2                  | H7N1    | Italy       | E                   | 1999 | turkey           | CY024889 | A/turkey/Italy/3185/1999(H7N1)                |
| 60             | PB2                  | H7N3    | Italy       | E                   | 2003 | turkey           | CY021364 | A/turkey/Italy/3620/2003(H7N3)                |
| 61             | PB2                  | H7N1    | Italy       | E                   | 1999 | turkey           | CY021412 | A/turkey/Italy/4580/1999(H7N1)                |
| 62             | PB2                  | H7N3    | Italy       | E                   | 2003 | turkey           | CY021500 | A/turkey/Italy/2987/2003(H7N3)                |
| 63             | PB2                  | H7N1    | Italy       | E                   | 2000 | quail            | CY022676 | A/quail/Italy/396/2000(H7N1)                  |
| 64             | PB2                  | H7N1    | Italy       | E                   | 2000 | turkey           | CY021548 | A/turkey/Italy/4426/2000(H7N1)                |
| 65             | PB2                  | H7N1    | Italy       | E                   | 1999 | quail            | CY025124 | A/quail/Italy/4992/1999(H7N1)                 |
| 66             | PB2                  | H7N3    | Italy       | E                   | 2004 | turkey           | CY028683 | A/turkey/Italy/3829/2004(H7N3)                |
| 67             | PB2                  | H7N3    | Italy       | E                   | 2004 | turkey           | CY028691 | A/turkey/Italy/3477/2004(H7N3)                |
| 68             | PB2                  | H7N1    | Italy       | E                   | 2000 | ostrich          | DQ991301 | A/ostrich/Italy/2332/00(H7N1)                 |
| 69             | PB2                  | H7N2    | Italy       | E                   | 2003 | duck             | CY031035 | A/duck/Italy/4609/2003(H7N2)                  |
| 70             | PB2                  | H7N3    | Italy       | E                   | 2004 | turkey           | CY020588 | A/turkey/Italy/4479/2004(H7N3)                |
| 71             | PB2                  | H7N3    | Italy       | E                   | 2003 | turkey           | CY020596 | A/turkey/Italy/251/2003(H7N3)                 |
| 72             | PB2                  | H7N3    | Italy       | E                   | 2003 | turkey           | CY022620 | A/turkey/Italy/2043/2003(H7N3)                |
| 73             | PB2                  | H7N1    | Italy       | E                   | 1999 | chicken          | CY022684 | A/chicken/Italy/1082/99(H7N1)                 |
| 74             | PB2                  | H7N2    | Italy       | E                   | 2003 | quail            | CY021516 | A/quail/Italy/4610/2003(H7N2)                 |
| 75             | PB2                  | H7N1    | Italy       | E                   | 2000 | turkey           | CY021540 | A/turkey/Italy/2984/2000(H7N1)                |
| 76             | PB2                  | H7N1    | Italy       | E                   | 1999 | turkey           | CY014643 | A/turkey/Italy/4169/1999(H7N1)                |
| 77             | PB2                  | H7N1    | Italy       | E                   | 1999 | turkey           | CY025116 | A/turkey/Italy/4644/1999(H7N1)                |
| 78             | PB2                  | H7N1    | Italy       | E                   | 1999 | chicken          | CY025132 | A/chicken/Italy/4789/1999(H7N1)               |
| 79             | PB2                  | H7N1    | Italy       | E                   | 1999 | turkey           | CY025148 | A/turkey/Italy/4617/1999(H7N1)                |
| 80             | PB2                  | H7N1    | Italy       | E                   | 1999 | turkey           | CY025156 | A/turkey/Italy/4301/1999(H7N1)                |
| 81             | PB2                  | H7N1    | Italy       | E                   | 1999 | turkey           | CY025172 | A/turkey/Italy/3560/1999(H7N1)                |
| 82             | PB2                  | H7N3    | Italy       | E                   | 2003 | chicken          | CY034757 | A/chicken/Italy/682/2003(H7N3)                |
| 83             | PB2                  | H7N1    | Mongolia    | E                   | 2002 | duck             | AB473540 | A/duck/Mongolia/867/2002(H7N1)                |
| 84             | PB2                  | H7N1    | Mongolia    | E                   | 2001 | duck             | AB473548 | A/duck/Mongolia/47/2001(H7N1)                 |
| 85             | PB2                  | H7N7    | Netherlands | E                   | 2003 | chicken          | AB438938 | A/chicken/Netherlands/2586/2003(H7N7)         |
| 86             | PB2                  | H7N7    | Netherlands | E                   | 2003 | chicken          | AY342414 | A/chicken/Netherlands/1/03(H7N7)              |
| 87             | PB2                  | H7N7    | Netherlands | E                   | 2003 | chicken          | EF015558 | A/chicken/Netherlands/03010132/03(H7N7)       |
| 88             | PB2                  | H7N3    | Netherlands | E                   | 2000 | mallard          | CY005851 | A/mallard/Netherlands/12/2000(H7N3)           |
| 89             | PB2                  | H7N8    | Netherlands | E                   | 2006 | mallard          | CY041417 | A/mallard/Netherlands/33/2006(H7N8)           |
| 90             | PB2                  | H7N7    | New Zealand | NZ                  | 2005 | duck             |          | A/duck/New Zealand/2005(H7N7)                 |
| 91             | PB2                  | H7N3    | Pakistan    | E                   | 1998 | chicken          | CY037751 | A/chicken/Pakistan/c1998/1998(H7N3)           |
| 92             | PB2                  | H7N3    | Pakistan    | E                   | 1995 | chicken          | CY015039 | A/chicken/Pakistan/34669/1995(H7N3)           |
| 93             | PB2                  | H7N3    | Pakistan    | E                   | 2002 | chicken          | CY035820 | A/chicken/Rawalpindi/NARC68/2002(H7N3)        |
| 94             | PB2                  | H7N3    | Pakistan    | E                   | 1995 | chicken          | CY035828 | A/chicken/Pakistan/34668/1995(H7N3)           |
| 95             | PB2                  | H7N3    | Pakistan    | E                   | 2002 | chicken          | CY035836 | A/chicken/Rawalpindi/NARC72/2002(H7N3)        |
| 96             | PB2                  | H7N1    | UK          | E                   | 1979 | African starling | AY724256 | A/African starling/England-Q/983/1979(H7N1)   |
| 97             | PB2                  | H7N3    | UK          | E                   | 1963 | turkey           | CY015072 | A/turkey/England/1963(H7N3)                   |
| 98             | PB2                  | H7N7    | UK          | E                   | 1934 | fowl             | M38291   | A/fowl/Weybridge(H7N7)                        |
| 99             | PB2                  | H7N2    | USA         | NA                  | 2005 | muscovy duck     | CY034853 | A/Muscovy duck/New York/11646-4/2005(H7N2)    |
| 100            | PB2                  | H7N2    | USA         | NA                  | 2005 | turkey           | CY034901 | A/turkey/New York/122501-2/2005(H7N2)         |
| 101            | PB2                  | H7N2    | USA         | NA                  | 2006 | chicken          | CY034917 | A/chicken/New York/19495-3/2006(H7N2)         |
| 102            | PB2                  | H7N2    | USA         | NA                  | 2005 | muscovy duck     | CY031714 | A/Muscovy duck/New York/23164-10/2005(H7N2)   |
| 103            | PB2                  | H7N2    | USA         | NA                  | 2002 | turkey           | EU982307 | A/turkey/VA/55/2002(H7N2)                     |
| 104            | PB2                  | H7N2    | USA         | NA                  | 1995 | emu              | EU980460 | A/emu/TX/25414/1995(H7N2)                     |
| 105            | PB2                  | H7N2    | USA         | NA                  | 2005 | chicken          | CY034805 | A/chicken/New York/88291-8/2005(H7N2)         |
| 106            | PB2                  | H7N2    | USA         | NA                  | 2005 | chicken          | CY034845 | A/chicken/New York/10508/2005(H7N2)           |
| 107            | PB2                  | H7N3    | USA         | NA                  | 2006 | shorebird        | CY036774 | A/shorebird/Delaware Bay/560/2006(H7N3)       |
| 108            | PB2                  | H7N3    | USA         | NA                  | 2007 | ruddy turnstone  | CY036790 | A/ruddy turnstone/Delaware Bay/121/2007(H7N3) |
| 109            | PB2                  | H7N3    | USA         | NA                  | 2001 | duck             | EU743014 | A/duck/PA/143585/2001(H7N3)                   |
| 110            | PB2                  | H7N2    | USA         | NA                  | 1994 | chicken          | FJ610057 | A/chicken/NY/4447-7/1994(H7N2)                |
| 111            | PB2                  | H7N3    | USA         | NA                  | 2006 | laughing gull    | CY037086 | A/laughing gull/Delaware Bay/6/2006(H7N3)     |
| 112            | PB2                  | H7N3    | USA         | NA                  | 2006 | shorebird        | CY041329 | A/shorebird/Delaware Bay/332/2006(H7N3)       |
| 113            | PB2                  | H7N3    | USA         | NA                  | 2006 | laughing gull    | CY037094 | A/laughing gull/Delaware Bay/46/2006(H7N3)    |
| 114            | PB2                  | H7N2    | USA         | NA                  | 2005 | chicken          | CY031219 | A/chicken/New York/10196-6/2005(H7N2)         |
| 115            | PB2                  | H7N2    | USA         | NA                  | 2005 | guinea fowl      | CY031227 | A/Guinea fowl/New York/10196-7/2005(H7N2)     |
| 116            | PB2                  | H7N2    | USA         | NA                  | 2005 | chicken          | CY031235 | A/chicken/New York/23164-6/2005(H7N2)         |
| 117            | PB2                  | H7N2    | USA         | NA                  | 1997 | chicken          | EU742947 | A/chicken/PA/11767/1997(H7N2)                 |
| 118            | PB2                  | H7N2    | USA         | NA                  | 2005 | guinea fowl      | CY031730 | A/Guinea fowl/New York/23165-12/2005(H7N2)    |
| 119            | PB2                  | H7N2    | USA         | NA                  | 2005 | chicken          | CY031754 | A/chicken/New York/31621-9/2005(H7N2)         |
| 120            | PB2                  | H7N3    | USA         | NA                  | 1985 | ruddy turnstone  | CY004412 | A/ruddy turnstone/New Jersey/65/1985(H7N3)    |
| 121            | PB2                  | H7N2    | USA         | NA                  | 1998 | quail            | EU742960 | A/quail/PA/20304/1998(H7N2)                   |
| 122            | PB2                  | H7N2    | USA         | NA                  | 1999 | chicken          | EU742982 | A/chicken/NJ/16224-6/1999(H7N2)               |
| 123            | PB2                  | H7N2    | USA         | NA                  | 2005 | quail            | CY034397 | A/quail/New York/89641/2005(H7N2)             |
| 124            | PB2                  | H7N2    | USA         | NA                  | 2005 | chicken          | CY031650 | A/chicken/New York/22067-12/2005(H7N2)        |
| 125            | PB2                  | H7N3    | USA         | NA                  | 1998 | Mallard          | CY016195 | A/Mallard/Ohio/322/1998(H7N3)                 |
| 126            | PB2                  | H7N2    | USA         | NA                  | 2005 | chukar           | CY022772 | A/chukar/New York/11653-1/2005(H7N2)          |



| # <sup>1</sup> | Protein <sup>2</sup> | Subtype | country | Region <sup>3</sup> | Year | Animal            | GenBank  | Virus name                                         |
|----------------|----------------------|---------|---------|---------------------|------|-------------------|----------|----------------------------------------------------|
| 127            | PB2                  | H7N2    | USA     | NA                  | 2005 | chicken           | CY022820 | A/chicken/New York/16326-5/2005(H7N2)              |
| 128            | PB2                  | H7N2    | USA     | NA                  | 2005 | duck              | CY022852 | A/duck/New York/21211-6/2005(H7N2)                 |
| 129            | PB2                  | H7N2    | USA     | NA                  | 2006 | chicken           | CY028635 | A/chicken/New York/29047-4/2006(H7N2)              |
| 130            | PB2                  | H7N2    | USA     | NA                  | 2006 | guinea fowl       | CY028579 | A/Guinea fowl/New York/8391-1/2006(H7N2)           |
| 131            | PB2                  | H7N3    | USA     | NA                  | 2004 | blue winged teal  | CY018908 | A/blue-winged teal/Ohio/658/2004(H7N3)             |
| 132            | PB2                  | H7N2    | USA     | NA                  | 1997 | chicken           | EU084916 | A/chicken/NY/6777-3/1997(H7N2)                     |
| 133            | PB2                  | H7N7    | USA     | NA                  | 1988 | ruddy turnstone   | CY005078 | A/ruddy turnstone/DE/2378/1988(H7N7)               |
| 134            | PB2                  | H7N2    | USA     | NA                  | 1996 | chicken           | EU980468 | A/chicken/NY/3202-7/1996(H7N2)                     |
| 135            | PB2                  | H7N2    | USA     | NA                  | 2006 | chicken           | CY035993 | A/chicken/New York/19495-4/2006(H7N2)              |
| 136            | PB2                  | H7N3    | USA     | NA                  | 2007 | ruddy turnstone   | CY036782 | A/ruddy turnstone/Delaware Bay/108/2007(H7N3)      |
| 137            | PB2                  | H7N2    | USA     | NA                  | 2005 | chicken           | CY034253 | A/chicken/New York/19499/2005(H7N2)                |
| 138            | PB2                  | H7N2    | USA     | NA                  | 2005 | guinea fowl       | CY031658 | A/Guinea fowl/New York/22071/2005(H7N2)            |
| 139            | PB2                  | H7N2    | USA     | NA                  | 2005 | chicken           | CY031690 | A/chicken/New York/23164-5/2005(H7N2)              |
| 140            | PB2                  | H7N3    | USA     | NA                  | 2001 | black duck        | CY020892 | A/Black Duck/Ohio/415/2001(H7N3)                   |
| 141            | PB2                  | H7N3    | USA     | NA                  | 2006 | shorebird         | EU030966 | A/shorebird/Delaware/22/06(H7N3)                   |
| 142            | PB2                  | H7N2    | USA     | NA                  | 2002 | chicken           | EU742973 | A/chicken/PA/149092-1/2002(H7N2)                   |
| 143            | PB2                  | H7N2    | USA     | NA                  | 1995 | chicken           | EU742956 | A/chicken/NY/13833-7/1995(H7N2)                    |
| 144            | PB2                  | H7N2    | USA     | NA                  | 1995 | chicken           | EU742942 | A/chicken/RI/4328-1/1995(H7N2)                     |
| 145            | PB2                  | H7N2    | USA     | NA                  | 1997 | chicken           | EU742937 | A/chicken/NY/8030-2/1997(H7N2)                     |
| 146            | PB2                  | H7N2    | USA     | NA                  | 1997 | chicken           | EU742932 | A/chicken/PA/7777-1/1997(H7N2)                     |
| 147            | PB2                  | H7N2    | USA     | NA                  | 2004 | chicken           | EU743260 | A/chicken/NJ/294508-12/2004(H7N2)                  |
| 148            | PB2                  | H7N7    | USA     | NA                  | 1927 | fowl              | CY014998 | A/fowl/Dobson/1927(H7N7)                           |
| 149            | PB2                  | H7N2    | USA     | NA                  | 2005 | chicken           | CY033304 | A/chicken/New York/37982-4/2005(H7N2)              |
| 150            | PB2                  | H7N2    | USA     | NA                  | 1994 | chicken           | EU742951 | A/chicken/NY/13142-5/1994(H7N2)                    |
| 151            | PB2                  | H7N1    | USA     | NA                  | 1993 | rhea              | EU742880 | A/rhea/North Carolina/39482/1993(H7N1)             |
| 152            | PB2                  | H7N2    | USA     | NA                  | 1995 | chicken           | EU182297 | A/chicken/NY/19542-5/1995(H7N2)                    |
| 153            | PB2                  | H7N2    | USA     | NA                  | 2005 | chicken           | CY022836 | A/chicken/New York/21211-2/2005(H7N2)              |
| 154            | PB2                  | H7N2    | USA     | NA                  | 2005 | chicken           | CY031778 | A/chicken/New York/42217/2005(H7N2)                |
| 155            | PB2                  | H7N2    | USA     | NA                  | 2005 | chicken           | CY033208 | A/chicken/New York/22067-8/2005(H7N2)              |
| 156            | PB2                  | H7N2    | USA     | NA                  | 2005 | chicken           | CY033256 | A/chicken/New York/30732-10/2005(H7N2)             |
| 157            | PB2                  | H7N3    | USA     | NA                  | 2005 | mallard           | CY021644 | A/mallard/Delaware/418/2005(H7N3)                  |
| 158            | PB2                  | H7N2    | USA     | NA                  | 1995 | chicken           | EU084907 | A/chicken/NY/3112-1/1995(H7N2)                     |
| 159            | PB2                  | H7N2    | USA     | NA                  | 2005 | chicken           | CY037054 | A/chicken/New York/88291-14/2005(H7N2)             |
| 160            | PB2                  | H7N2    | USA     | NA                  | 2001 | guinea fowl       | EU742919 | A/guinea fowl/NJ/119063-8/2001(H7N2)               |
| 161            | PB2                  | H7N3    | USA     | NA                  | 2007 | northern shoveler | CY039577 | A/northern shoveler/California/HKWF1026/2007(H7N3) |
| 162            | PB2                  | H7N2    | USA     | NA                  | 2005 | chicken           | CY034373 | A/chicken/New York/88291-11/2005(H7N2)             |
| 163            | PB2                  | H7N2    | USA     | NA                  | 2005 | chicken           | CY031123 | A/chicken/New York/30732-6/2005(H7N2)              |
| 164            | PB2                  | H7N7    | USA     | NA                  | 2007 | mallard           | CY033377 | A/mallard/California/HKWF1971/2007(H7N7)           |
| 165            | PB2                  | H7N2    | USA     | NA                  | 2005 | chicken           | CY037102 | A/chicken/New York/87493-2/2005(H7N2)              |
| 166            | PB2                  | H7N7    | USA     | NA                  | 1989 | red knot          | CY005085 | A/red knot/NJ/325/1989(H7N7)                       |
| 167            | PB2                  | H7N2    | USA     | NA                  | 2005 | guinea fowl       | CY028514 | A/Guinea fowl/New York/143646-3/2005(H7N2)         |
| 168            | PB2                  | H7N2    | USA     | NA                  | 2006 | chicken           | CY028547 | A/chicken/New York/3181-5/2006(H7N2)               |
| 169            | PB2                  | H7N2    | USA     | NA                  | 2000 | chicken           | EU084903 | A/chicken/NY/30749-3/2000(H7N2)                    |
| 170            | PB2                  | H7N2    | USA     | NA                  | 2001 | chicken           | EU084913 | A/chicken/NJ/118878-5/2001(H7N2)                   |
| 171            | PB2                  | H7N2    | USA     | NA                  | 1997 | turkey            | EU084920 | A/turkey/PA/7975/1997(H7N2)                        |
| 172            | PB2                  | H7N9    | USA     | NA                  | 2006 | blue winged teal  | CY024825 | A/blue-winged teal/Ohio/566/2006(H7N9)             |
| 173            | PB2                  | H7N2    | USA     | NA                  | 2005 | chukar            | CY024849 | A/chukar/New York/21211-7/2005(H7N2)               |
| 174            | PB2                  | H7N2    | USA     | NA                  | 2005 | duck              | CY034813 | A/duck/New York/98616-4/2005(H7N2)                 |
| 175            | PB2                  | H7N2    | USA     | NA                  | 2005 | quail             | CY033320 | A/quail/New York/63806-13/2005(H7N2)               |
| 176            | PB2                  | H7N2    | USA     | NA                  | 2005 | duck              | CY034821 | A/duck/New York/98616-5/2005(H7N2)                 |
| 177            | PB2                  | H7N2    | USA     | NA                  | 2005 | chicken           | CY035985 | A/chicken/New York/122501-1/2005(H7N2)             |
| 178            | PB2                  | H7N2    | USA     | NA                  | 2006 | guinea fowl       | CY036001 | A/Guinea fowl/New York/19495-6/2006(H7N2)          |
| 179            | PB2                  | H7N3    | USA     | NA                  | 1994 | chicken           | EU743018 | A/chicken/New Jersey/15086-3/1994(H7N3)            |
| 180            | PB2                  | H7N2    | USA     | NA                  | 1998 | quail             | EU742923 | A/quail/NY/13989-51/1998(H7N2)                     |
| 181            | PB2                  | H7N2    | USA     | NA                  | 2005 | chicken           | CY034309 | A/chicken/New York/23165-10/2005(H7N2)             |
| 182            | PB2                  | H7N2    | USA     | NA                  | 2005 | chicken           | CY034349 | A/chicken/New York/63806-12/2005(H7N2)             |
| 183            | PB2                  | H7N2    | USA     | NA                  | 2005 | chicken           | CY034365 | A/chicken/New York/88291-6/2005(H7N2)              |
| 184            | PB2                  | H7N2    | USA     | NA                  | 1995 | turkey            | EU182293 | A/turkey/NY/13820-3/1995(H7N2)                     |
| 185            | PB2                  | H7N2    | USA     | NA                  | 2003 | chicken           | EU743002 | A/chicken/CT/260413-2/2003(H7N2)                   |
| 186            | PB2                  | H7N2    | USA     | NA                  | 2002 | chicken           | CY014900 | A/chicken/Pennsylvania/143586/2002(H7N2)           |
| 187            | PB2                  | H7N3    | USA     | NA                  | 1980 | turkey            | CY014785 | A/turkey/Minnesota/1200/1980(H7N3)                 |
| 188            | PB2                  | H7N2    | USA     | NA                  | 1997 | chicken           | EU742968 | A/chicken/PA/19241/1997(H7N2)                      |
| 189            | PB2                  | H7N2    | USA     | NA                  | 2001 | chicken           | EU742895 | A/chicken/FL/90348-4/2001(H7N2)                    |
| 190            | PB2                  | H7N2    | USA     | NA                  | 2005 | chicken           | CY031083 | A/chicken/New York/23165-6/2005(H7N2)              |
| 191            | PB2                  | H7N2    | USA     | NA                  | 2005 | guinea fowl       | CY037070 | A/Guinea fowl/New York/98616-3/2005(H7N2)          |
| 192            | PB2                  | H7N3    | USA     | NA                  | 2008 | green winged teal | CY039537 | A/green winged teal/California/AKS1370/2008(H7N3)  |
| 193            | PB2                  | H7N3    | USA     | NA                  | 2008 | northern shoveler | CY039593 | A/northern shoveler/California/HKWF2031/2008(H7N3) |
| 194            | PB2                  | H7N3    | USA     | NA                  | 1980 | pheasant          | CY005895 | A/pheasant/Minnesota/917/1980(H7N3)                |
| 195            | PB2                  | H7N2    | USA     | NA                  | 2001 | chicken           | EU084909 | A/chicken/NY/119256-7/2001(H7N2)                   |

| # <sup>1</sup> | Protein <sup>2</sup> | Subtype | country | Region <sup>3</sup> | Year | Animal          | GenBank  | Virus name                                    |
|----------------|----------------------|---------|---------|---------------------|------|-----------------|----------|-----------------------------------------------|
| 196            | PB2                  | H7N3    | USA     | NA                  | 1999 | chicken         | EU084927 | A/Chicken/NY/14714-2/1999(H7N3)               |
| 197            | PB2                  | H7N2    | USA     | NA                  | 2005 | chicken         | CY024841 | A/chicken/New York/21211-1/2005(H7N2)         |
| 198            | PB2                  | H7N2    | USA     | NA                  | 2001 | avian           | EU026101 | A/avian/NY/118353-1/2001(H7N2)                |
| 199            | PB2                  | H7N8    | USA     | NA                  | 1987 | mallard         | CY021628 | A/mallard/Ohio/421/1987(H7N8)                 |
| 200            | PB2                  | H7N9    | USA     | NA                  | 1988 | turkey          | CY014793 | A/turkey/Minnesota/1/1988(H7N9)               |
| 201            | PB2                  | H7N2    | USA     | NA                  | 1995 | guinea fowl     | CY014843 | A/guinea fowl/New York/13820-3/1995(H7N2)     |
| 202            | PB2                  | H7N3    | USA     | NA                  | 2006 | laughing gull   | EU030982 | A/laughing gull/Delaware/42/06(H7N3)          |
| 203            | PB2                  | H7N2    | USA     | NA                  | 2005 | chicken         | CY029840 | A/chicken/New York/16326-4/2005(H7N2)         |
| 204            | PB2                  | H7N2    | USA     | NA                  | 1998 | goose           | EU743272 | A/goose/NY/8600-3/1998(H7N2)                  |
| 205            | PB2                  | H7N2    | USA     | NA                  | 2002 | turkey          | EU743265 | A/turkey/VA/158512/2002(H7N2)                 |
| 206            | PB2                  | H7N2    | USA     | NA                  | 2005 | chicken         | CY035937 | A/chicken/New York/88291-10/2005(H7N2)        |
| 207            | PB2                  | H7N2    | USA     | NA                  | 2006 | chicken         | CY034909 | A/chicken/New York/19495-2/2006(H7N2)         |
| 208            | PB2                  | H7N3    | USA     | NA                  | 1995 | turkey          | EU980473 | A/turkey/Utah/24721-10/1995(H7N3)             |
| 209            | PB2                  | H7N2    | USA     | NA                  | 1994 | turkey          | EU980464 | A/turkey/NY/4450-5/1994(H7N2)                 |
| 210            | PB2                  | H7N2    | USA     | NA                  | 2005 | muscovy duck    | CY034797 | A/Muscovy duck/New York/87493-3/2005(H7N2)    |
| 211            | PB2                  | H7N2    | USA     | NA                  | 2005 | guinea fowl     | CY034837 | A/Guinea fowl/New York/101276-1/2005(H7N2)    |
| 212            | PB2                  | H7N2    | USA     | NA                  | 2005 | chicken         | CY031642 | A/chicken/New York/22067-7/2005(H7N2)         |
| 213            | PB2                  | H7N2    | USA     | NA                  | 2005 | guinea fowl     | CY031682 | A/Guinea fowl/New York/23164-3-05/2005(H7N2)  |
| 214            | PB2                  | H7N2    | USA     | NA                  | 2006 | chicken         | CY028587 | A/chicken/New York/8391-2/2006(H7N2)          |
| 215            | PB2                  | H7N2    | USA     | NA                  | 2006 | guinea fowl     | CY028603 | A/Guinea fowl/New York/19501-4/2006(H7N2)     |
| 216            | PB2                  | H7N2    | USA     | NA                  | 2005 | guinea fowl     | CY033288 | A/Guinea fowl/New York/31621-8/2005(H7N2)     |
| 217            | PB2                  | H7N2    | USA     | NA                  | 2005 | chicken         | CY033312 | A/chicken/New York/63806-8/2005(H7N2)         |
| 218            | PB2                  | H7N2    | USA     | NA                  | 2000 | chicken         | EU742986 | A/chicken/NJ/30739-6/2000(H7N2)               |
| 219            | PB2                  | H7N2    | USA     | NA                  | 2002 | guinea hen      | EU742977 | A/guinea hen/MA/14801-11/2002(H7N2)           |
| 220            | PB2                  | H7N2    | USA     | NA                  | 1998 | chicken         | EU742927 | A/chicken/PA/13552-1/1998(H7N2)               |
| 221            | PB2                  | H7N2    | USA     | NA                  | 2005 | chicken         | CY034197 | A/chicken/New York/143646-2/2005(H7N2)        |
| 222            | PB2                  | H7N2    | USA     | NA                  | 2006 | guinea fowl     | CY034245 | A/Guinea fowl/New York/32084/2006(H7N2)       |
| 223            | PB2                  | H7N2    | USA     | NA                  | 2005 | chicken         | CY033248 | A/chicken/New York/30732-9/2005(H7N2)         |
| 224            | PB2                  | H7N2    | USA     | NA                  | 2005 | chukar          | CY031075 | A/chukar/New York/23164-13/2005(H7N2)         |
| 225            | PB2                  | H7N3    | USA     | NA                  | 2006 | ruddy turnstone | CY037110 | A/ruddy turnstone/Delaware Bay/283/2006(H7N3) |
| 226            | PB2                  | H7N2    | USA     | NA                  | 2005 | guinea fowl     | CY035961 | A/Guinea fowl/New York/11646-3/2005(H7N2)     |
| 227            | PB2                  | H7N2    | USA     | NA                  | 2006 | muscovy duck    | CY036009 | A/Muscovy duck/New York/19495-7/2006(H7N2)    |
| 228            | PB2                  | H7N2    | USA     | NA                  | 2006 | chicken         | CY036017 | A/chicken/New York/19499-1/2006(H7N2)         |
| 229            | PB2                  | H7N2    | USA     | NA                  | 1999 | chicken         | FJ517330 | A/chicken/NY/21586-8/1999(H7N2)               |

<sup>1</sup> Reference number for taxa displayed in trees. <sup>2</sup> Protein coding region used. Common abbreviations are used for protein names. <sup>3</sup> Geographic Regions. E=Eurasia (includes Asia, Africa, Europe), NA=North America, SA=South America, A=Australia, NZ=New Zealand

**Suppl. Table 2.** Details of additional subtype N3 taxa used in Suppl. Fig. 3.

| #1  | Protein <sup>2</sup> | Subtype | country     | Region <sup>5</sup> | Year | Animal            | GenBank  | Virus name                                          |
|-----|----------------------|---------|-------------|---------------------|------|-------------------|----------|-----------------------------------------------------|
| 286 | NA                   | H10N3   | Canada      | NA                  | 1978 | blue-winged teal  | CY005189 | A/blue-winged teal/ALB/778/1978(H10N3)              |
| 287 | NA                   | H10N3   | China       | E                   | 2003 | duck              | EU429702 | A/duck/Eastern China/368/2003(H10N3)                |
| 288 | NA                   | H10N3   | China       | E                   | 2003 | duck              | EU429708 | A/duck/Eastern China/397/2003(H10N3)                |
| 289 | NA                   | H10N3   | China       | E                   | 2003 | duck              | EU429709 | A/duck/Eastern China/404/2003(H10N3)                |
| 290 | NA                   | H10N3   | China       | E                   | 2003 | duck              | EU429714 | A/duck/Eastern China/372/2003(H10N3)                |
| 291 | NA                   | H10N3   | China       | E                   | 2003 | duck              | EU429715 | A/duck/Eastern China/495/2003(H10N3)                |
| 292 | NA                   | H10N3   | China       | E                   | 2003 | duck              | EU429716 | A/duck/Eastern China/527/2003(H10N3)                |
| 293 | NA                   | H10N3   | China       | E                   | 2003 | duck              | EU429704 | A/duck/Eastern China/395/2003(H10N3)                |
| 294 | NA                   | H10N3   | China       | E                   | 2002 | duck              | EU429711 | A/duck/Eastern China/453/2002(H10N3)                |
| 295 | NA                   | H10N3   | China       | E                   | 2003 | duck              | EU429703 | A/duck/Eastern China/356/2003(H10N3)                |
| 296 | NA                   | H10N3   | China       | E                   | 2003 | duck              | EU429705 | A/duck/Eastern China/502/2003(H10N3)                |
| 297 | NA                   | H10N3   | China       | E                   | 2003 | duck              | EU429712 | A/duck/Eastern China/488/2003(H10N3)                |
| 298 | NA                   | H10N3   | Hong_Kong   | E                   | 1979 | duck              | AB292413 | A/duck/Hong Kong/786/1979(H10N3)                    |
| 299 | NA                   | H10N3   | USA         | NA                  | 2007 | northern shoveler | CY032658 | A/northern shoveler/California/HKWF1005/2007(H10N3) |
| 300 | NA                   | H10N3   | USA         | NA                  | 2007 | northern shoveler | CY032690 | A/northern shoveler/California/HKWF1370/2007(H10N3) |
| 301 | NA                   | H11N3   | Canada      | NA                  | 1983 | mallard duck      | CY005275 | A/mallard duck/ALB/797/1983(H11N3)                  |
| 302 | NA                   | H11N3   | Japan       | E                   | 1985 | swan              | AB296077 | A/swan/Shimane/183/1985(H11N3)                      |
| 303 | NA                   | H11N3   | New_Zealand | NZ                  | 1976 | duck              | AY207508 | A/duck/New Zealand/164/76(H11N3)                    |
| 304 | NA                   | H11N3   | New_Zealand | NZ                  | 1976 | duck              | CY005741 | A/duck/New Zealand/164/76(H11N3)                    |
| 305 | NA                   | H11N3   | USA         | NA                  | 2005 | mallard           | CY021143 | A/mallard/Missouri/MO130/2005(H11N3)                |
| 306 | NA                   | H11N3   | USA         | NA                  | 1986 | mallard           | CY018017 | A/mallard/Ohio/102/1986(H11N3)                      |
| 307 | NA                   | H11N3   | USA         | NA                  | 1993 | mallard           | CY021255 | A/mallard/Ohio/94/1993(H11N3)                       |
| 308 | NA                   | H12N3   | Norway      | E                   | 2006 | mallard           | FM179760 | A/mallard/Norway/10_1781/2006(H12N3)                |
| 309 | NA                   | H13N3   | Russia      | E                   | 1983 | tern              | AY207523 | A/tern/Astrakhan/775/83(H13N3)                      |
| 310 | NA                   | H16N3   | Norway      | E                   | 2006 | herring gull      | FM179761 | A/herring gull/Norway/10_1623/2006(H16N3)           |
| 311 | NA                   | H16N3   | Norway      | E                   | 2006 | common gull       | FM179759 | A/common gull/Norway/10_1617/2006(H16N3)            |
| 312 | NA                   | H16N3   | Sweden      | E                   | 1999 | black-headed gull | AY684903 | A/black-headed gull/Sweden/3/99(H16N3)              |
| 313 | NA                   | H16N3   | Sweden      | E                   | 1999 | black-headed gull | AY684905 | A/black-headed gull/Sweden/5/99(H16N3)              |
| 314 | NA                   | H16N3   | Sweden      | E                   | 1999 | black-headed gull | AY684902 | A/black-headed gull/Sweden/2/99(H16N3)              |
| 315 | NA                   | H16N3   | USA         | NA                  | 1988 | herring gull      | CY014569 | A/herring gull/Delaware/712/1988(H16N3)             |
| 316 | NA                   | H16N3   | USA         | NA                  | 2006 | shorebird         | EU030978 | A/shorebird/Delaware/168/06(H16N3)                  |
| 317 | NA                   | H1N3    | France      | E                   | 2001 | teal              | AJ849936 | A/teal/France/2546/2001(H1N3)                       |
| 318 | NA                   | H1N3    | New_Zealand | NZ                  | 1976 | duck              | CY005736 | A/duck/NZL/160/1976(H1N3)                           |
| 319 | NA                   | H1N3    | USA         | NA                  | 2002 | blue winged teal  | FJ357039 | A/blue winged teal/TX/34/2002(H1N3)                 |
| 320 | NA                   | H1N3    | USA         | NA                  | 2002 | blue winged teal  | FJ357047 | A/blue winged teal/TX/75/2002(H1N3)                 |
| 321 | NA                   | H2N3    | Canada      | NA                  | 1998 | mallard           | AY207517 | A/mallard/Alberta/226/98(H2N3)                      |
| 322 | NA                   | H2N3    | Canada      | NA                  | 1998 | mallard           | AY633198 | A/mallard/Alberta/205/98(H2N3)                      |
| 323 | NA                   | H2N3    | Canada      | NA                  | 1985 | mallard duck      | CY003881 | A/mallard duck/Alberta/376/1985(H2N3)               |
| 324 | NA                   | H2N3    | Canada      | NA                  | 1988 | mallard           | CY003938 | A/mallard/Alberta/353/1988(H2N3)                    |
| 325 | NA                   | H2N3    | Canada      | NA                  | 1977 | mallard           | CY003849 | A/mallard/Alberta/77/1977(H2N3)                     |
| 326 | NA                   | H2N3    | Canada      | NA                  | 1996 | mallard           | CY003946 | A/mallard/Alberta/201/1996(H2N3)                    |
| 327 | NA                   | H2N3    | Canada      | NA                  | 2003 | mallard           | CY003994 | A/mallard/Alberta/79/2003(H2N3)                     |
| 328 | NA                   | H2N3    | Germany     | E                   | 1973 | duck              | AY207522 | A/duck/Germany/1215/1973(H2N3)                      |
| 329 | NA                   | H2N3    | Germany     | E                   | 1985 | duck              | AY207509 | A/duck/Postdam/1689/85(H2N3)                        |
| 330 | NA                   | H2N3    | Italy       | E                   | 1999 | mallard           | AY586413 | A/mallard/Italy/36/1999(H2N3)                       |
| 331 | NA                   | H2N3    | Italy       | E                   | 1999 | mallard           | AY586412 | A/mallard/Italy/35/1999(H2N3)                       |
| 332 | NA                   | H2N3    | Japan       | E                   | 2001 | duck              | AB298282 | A/duck/Hokkaido/17/2001(H2N3)                       |
| 333 | NA                   | H2N3    | Russia      | E                   | 1976 | pintail           | AY207518 | A/pintail/Primorie/625/76(H2N3)                     |
| 334 | NA                   | H2N3    | Sweden      | E                   | 2005 | mallard           | CY041332 | A/mallard/Sweden/45/2005(H2N3)                      |
| 335 | NA                   | H2N3    | USA         | NA                  | 1994 | laughing gull     | AY207516 | A/laughing gull/Delaware/34/94(H2N3)                |
| 336 | NA                   | H2N3    | USA         | NA                  | 1996 | silkiechicken     | AY207521 | A/silkiechicken/Pennsylvania/897/96(H2N3)           |
| 337 | NA                   | H2N3    | USA         | NA                  | 2001 | mallard           | FJ686788 | A/mallard/Maryland/234/2001(H2N3)                   |
| 338 | NA                   | H2N3    | USA         | NA                  | 1998 | mallard           | FJ357086 | A/mallard/MN/51/1998(H2N3)                          |
| 339 | NA                   | H2N3    | USA         | NA                  | 2001 | mallard           | FJ686780 | A/mallard/Maryland/233/2001(H2N3)                   |
| 340 | NA                   | H2N3    | USA         | NA                  | 2003 | mallard           | FJ686812 | A/mallard/Maryland/316/2003(H2N3)                   |
| 341 | NA                   | H2N3    | USA         | NA                  | 2006 | northern pintail  | EU557561 | A/northern pintail/Alaska/44183-123/2006(H2N3)      |
| 342 | NA                   | H2N3    | USA         | NA                  | 2001 | mallard           | FJ686756 | A/mallard/Maryland/228/2001(H2N3)                   |
| 343 | NA                   | H2N3    | USA         | NA                  | 2001 | mallard           | FJ686772 | A/mallard/Maryland/232/2001(H2N3)                   |
| 344 | NA                   | H2N3    | USA         | NA                  | 2003 | mallard           | GQ257513 | A/mallard/Maryland/333/2003(H2N3)                   |
| 345 | NA                   | H2N3    | USA         | NA                  | 1998 | mallard           | FJ357079 | A/mallard/MN/14/1998(H2N3)                          |

| # <sup>1</sup> | Protein <sup>2</sup> | Subtype | country     | Region <sup>3</sup> | Year | Animal            | GenBank  | Virus name                                        |
|----------------|----------------------|---------|-------------|---------------------|------|-------------------|----------|---------------------------------------------------|
| 346            | NA                   | H2N3    | USA         | NA                  | 2000 | mallard           | FJ517269 | A/mallard/MN/506/2000(H2N3)                       |
| 347            | NA                   | H3N3    | Canada      | NA                  | 1978 | mallard duck      | CY004601 | A/mallard duck/ALB/712/1978(H3N3)                 |
| 348            | NA                   | H3N3    | Canada      | NA                  | 1988 | mallard           | CY004682 | A/mallard/ALB/394/1988(H3N3)                      |
| 349            | NA                   | H3N3    | China       | E                   | 2000 | bantam            | AY180837 | A/bantam/Nanchang/9-366/2000(H3N3)                |
| 350            | NA                   | H3N3    | China       | E                   | 2000 | pigeon            | AY180838 | A/pigeon/Nanchang/9-058/2000(H3N3)                |
| 351            | NA                   | H3N3    | Hong_Kong   | E                   | 1976 | duck              | AB292411 | A/duck/Hong Kong/22A/1976(H3N3)                   |
| 352            | NA                   | H3N3    | SouthKorea  | E                   | 2006 | aquatic bird      | EU301282 | A/aquatic bird/Korea/CN-4/2006(H3N3)              |
| 353            | NA                   | H3N3    | USA         | NA                  | 2007 | northern shoveler | CY032730 | A/northern shoveler/California/HKWF979/2007(H3N3) |
| 354            | NA                   | H4N3    | Barbados    | NA                  | 2004 | blue-winged teal  | DQ236167 | A/blue-winged teal/Barbados/21/04(H4N3)           |
| 355            | NA                   | H4N3    | Canada      | NA                  | 1990 | blue-winged teal  | CY004898 | A/blue-winged teal/ALB/136/1990(H4N3)             |
| 356            | NA                   | H4N3    | Canada      | NA                  | 1977 | mallard           | CY004751 | A/mallard/Alberta/300/1977(H4N3)                  |
| 357            | NA                   | H4N3    | Hong_Kong   | E                   | 1977 | duck              | AB292409 | A/duck/Hong Kong/229/1977(H4N3)                   |
| 358            | NA                   | H4N3    | Mongolia    | E                   | 2007 | duck              | AB450447 | A/duck/Mongolia/274/2007(H4N3)                    |
| 359            | NA                   | H4N3    | Sweden      | E                   | 2005 | mallard           | CY041356 | A/mallard/Sweden/65/2005(H4N3)                    |
| 360            | NA                   | H4N3    | USA         | NA                  | 1982 | pintail duck      | CY014939 | A/pintail duck/New York/155/1982(H4N3)            |
| 361            | NA                   | H5N3    | China       | E                   | 2002 | duck              | EF597318 | A/duck/Yunnan/435/2002(H5N3)                      |
| 362            | NA                   | H5N3    | China       | E                   | 2003 | duck              | EF597319 | A/duck/Jiang Xi/6146/2003(H5N3)                   |
| 363            | NA                   | H5N3    | China       | E                   | 2005 | migratory duck    | EF597321 | A/migratory duck/Jiang Xi/13487/2005(H5N3)        |
| 364            | NA                   | H5N3    | France      | E                   | 2005 | duck              | AM040151 | A/duck/France/05054a/2005(H5N3)                   |
| 365            | NA                   | H5N3    | France      | E                   | 2002 | duck              | AJ849934 | A/duck/France/02166/2002(H5N3)                    |
| 366            | NA                   | H5N3    | Hong_Kong   | E                   | 1979 | duck              | AY207506 | A/duck/HongKong/27408/79(H5N3)                    |
| 367            | NA                   | H5N3    | Hong_Kong   | E                   | 1978 | goose             | AY207512 | A/goose/HongKong/27404/78(H5N3)                   |
| 368            | NA                   | H5N3    | Hong_Kong   | E                   | 1980 | duck              | EF597317 | A/duck/Hong Kong/819/1980(H5N3)                   |
| 369            | NA                   | H5N3    | Hong_Kong   | E                   | 1977 | duck              | CY005591 | A/duck/Hong Kong/205/1977(H5N3)                   |
| 370            | NA                   | H5N3    | Hong_Kong   | E                   | 1979 | duck              | EF597316 | A/duck/Hong Kong/698/1979(H5N3)                   |
| 371            | NA                   | H5N3    | Hong_Kong   | E                   | 2004 | migratory duck    | EF597320 | A/migratory duck/Hong Kong/MP206/2004(H5N2)       |
| 372            | NA                   | H5N3    | Hong_Kong   | E                   | 1976 | duck              | EF597312 | A/duck/Hong Kong/23/1976(H5N3)                    |
| 373            | NA                   | H5N3    | Hong_Kong   | E                   | 1978 | goose             | EF597313 | A/goose/Hong Kong/23/1978(H5N3)                   |
| 374            | NA                   | H5N3    | Hong_Kong   | E                   | 1978 | duck              | EF597315 | A/duck/Hong Kong/394/1978(H5N3)                   |
| 375            | NA                   | H5N3    | Italy       | E                   | 2000 | mallard           | AY586414 | A/mallard/Italy/208/2000(H5N3)                    |
| 376            | NA                   | H5N3    | Italy       | E                   | 2005 | teal              | CY022647 | A/teal/Italy/3812/2005(H5N3)                      |
| 377            | NA                   | H5N3    | Italy       | E                   | 2004 | duck              | CY024748 | A/duck/Italy/775/2004(H5N3)                       |
| 378            | NA                   | H5N3    | Japan       | E                   | 2002 | duck              | AB472023 | A/duck/Shizuoka/40/2002(H5N3)                     |
| 379            | NA                   | H5N3    | Japan       | E                   | 2005 | duck              | AB472024 | A/duck/Tsukuba/394/2005(H5N3)                     |
| 380            | NA                   | H5N3    | Japan       | E                   | 2006 | duck              | AB472057 | A/duck/Niigata/514/2006(H5N3)                     |
| 381            | NA                   | H5N3    | Japan       | E                   | 2006 | duck              | AB472056 | A/duck/Chiba/1/2006(H5N3)                         |
| 382            | NA                   | H5N3    | Japan       | E                   | 2002 | duck              | AB299161 | A/duck/Hokkaido/84/2002(H5N3)                     |
| 383            | NA                   | H5N3    | Japan       | E                   | 1996 | swan              | AB300043 | A/swan/Hokkaido/67/1996(H5N3)                     |
| 384            | NA                   | H5N3    | Japan       | E                   | 2007 | duck              | AB378684 | A/duck/Hokkaido/167/2007(H5N3)                    |
| 385            | NA                   | H5N3    | Russia      | E                   | 2001 | duck              | GQ227605 | A/duck/Primorie/2633/2001(H5N3)                   |
| 386            | NA                   | H5N3    | Russia      | E                   | 1991 | duck              | GQ227552 | A/duck/Altai/1285/1991(H5N3)                      |
| 387            | NA                   | H5N3    | Singapore   | E                   | 1997 | duck              | AY207510 | A/duck/Singapore/3/1997(H5N3)                     |
| 388            | NA                   | H5N3    | SouthAfrica | E                   | 1961 | tern              | AY207524 | A/tern/South Africa/1961(H5N3)                    |
| 389            | NA                   | H5N3    | USA         | NA                  | 1979 | turkey            | AY207525 | A/turkey/CA/6878/1979(H5N3)                       |
| 390            | NA                   | H5N3    | USA         | NA                  | 2000 | ruddy turnstone   | AY300946 | A/ruddy turnstone/NJ/2242/00(H5N3)                |
| 391            | NA                   | H5N3    | USA         | NA                  | 1975 | mallard           | EU743130 | A/mallard/WI/169/1975(H5N3)                       |
| 392            | NA                   | H5N3    | USA         | NA                  | 1989 | herring gull      | CY004972 | A/herring gull/NJ/406/1989(H5N3)                  |
| 393            | NA                   | H5N3    | USA         | NA                  | 1975 | sabines gull      | CY015157 | A/sabines gull/Alaska/296/1975(H5N3)              |
| 394            | NA                   | H5N3    | USA         | NA                  | 2000 | mallard           | EU871908 | A/mallard/MN/479/2000(H5N3)                       |
| 395            | NA                   | H6N3    | Canada      | NA                  | 1985 | mallard duck      | CY004204 | A/mallard duck/ALB/76/1985(H6N3)                  |
| 396            | NA                   | H6N3    | USA         | NA                  | 1989 | chicken           | CY014911 | A/chicken/New York/28263/1989(H6N3)               |
| 397            | NA                   | H8N3    | Germany     | E                   | 2006 | Perdix perdix     | AM933234 | A/Perdix perdix/Germany/R44/06(H8N3)              |
| 398            | NA                   | H9N3    | France      | E                   | 2001 | mallard           | AJ849935 | A/mallard/France/2518/2001(H9N3)                  |
| 399            | NA                   | H9N3    | Ireland     | E                   | 1993 | mallard           | AB303078 | A/mallard/Ireland/PV46B/1993(H9N3)                |

<sup>1</sup> Reference number for taxa displayed in trees. <sup>2</sup> Protein coding region used. Common abbreviations are used for protein names. <sup>3</sup> Geographic Regions. E=Eurasia (includes Asia, Africa, Europe), NA=North America, SA=South America, A=Australia, NZ=New Zealand

**Suppl. Figure 1: Minimum Evolution Tree: hemagglutinin (view 1)**

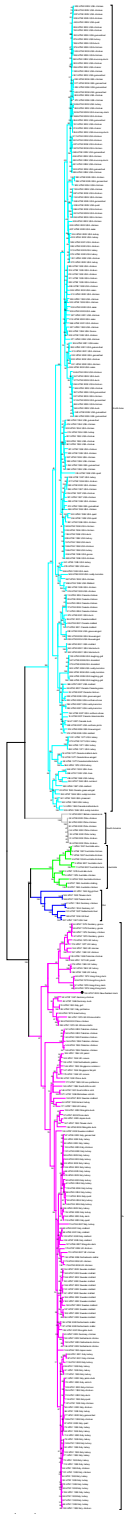

**Suppl. Figure 1: Inferred relationships for 371 subtype H7 protein coding sequences for HA<sub>0</sub>.** The tree shows the relationships between the major geographic clades of the HA0 gene. The evolutionary history was inferred using the Minimum Evolution method. The optimal tree with the sum of branch length = 3.05693659 is shown. The percentage of replicate trees in which the associated taxa clustered together in the bootstrap test (100 replicates) are shown next to the branches. The tree is drawn to scale, with branch lengths in the same units as those of the evolutionary distances used to infer the phylogenetic tree. The evolutionary distances were computed using the Maximum Composite Likelihood method and are in the units of the number of base substitutions per site. The ME tree was searched using the Close-Neighbor-Interchange (CNI) algorithm at a search level of 1. The Neighbor-joining algorithm was used to generate the initial tree. All positions containing gaps and missing data were eliminated from the dataset (Complete deletion option). There were a total of 1557 positions in the final dataset. Phylogenetic analyses were conducted in MEGA4 (29).

# Suppl. Figure 1: Minimum Evolution Tree: hemagglutinin (view 2: Compressed North America)

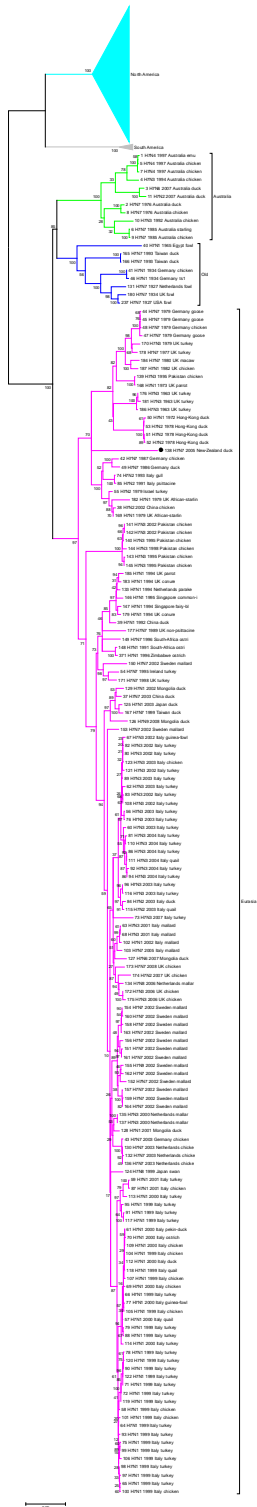

**Suppl. Figure 1: Inferred relationships for 371 subtype H7 protein coding sequences for HA<sub>0</sub>.** The tree shows the relationships between the major geographic clades of the HA0 gene. The evolutionary history was inferred using the Minimum Evolution method. The optimal tree with the sum of branch length = 3.05693659 is shown. The percentage of replicate trees in which the associated taxa clustered together in the bootstrap test (100 replicates) are shown next to the branches. The tree is drawn to scale, with branch lengths in the same units as those of the evolutionary distances used to infer the phylogenetic tree. The evolutionary distances were computed using the Maximum Composite Likelihood method and are in the units of the number of base substitutions per site. The ME tree was searched using the Close-Neighbor-Interchange (CNI) algorithm at a search level of 1. The Neighbor-joining algorithm was used to generate the initial tree. All positions containing gaps and missing data were eliminated from the dataset (Complete deletion option). There were a total of 1557 positions in the final dataset. Phylogenetic analyses were conducted in MEGA4 (29).



**Suppl. Figure 2a: Minimum Evolution Tree: neuraminidase\_H7N3**

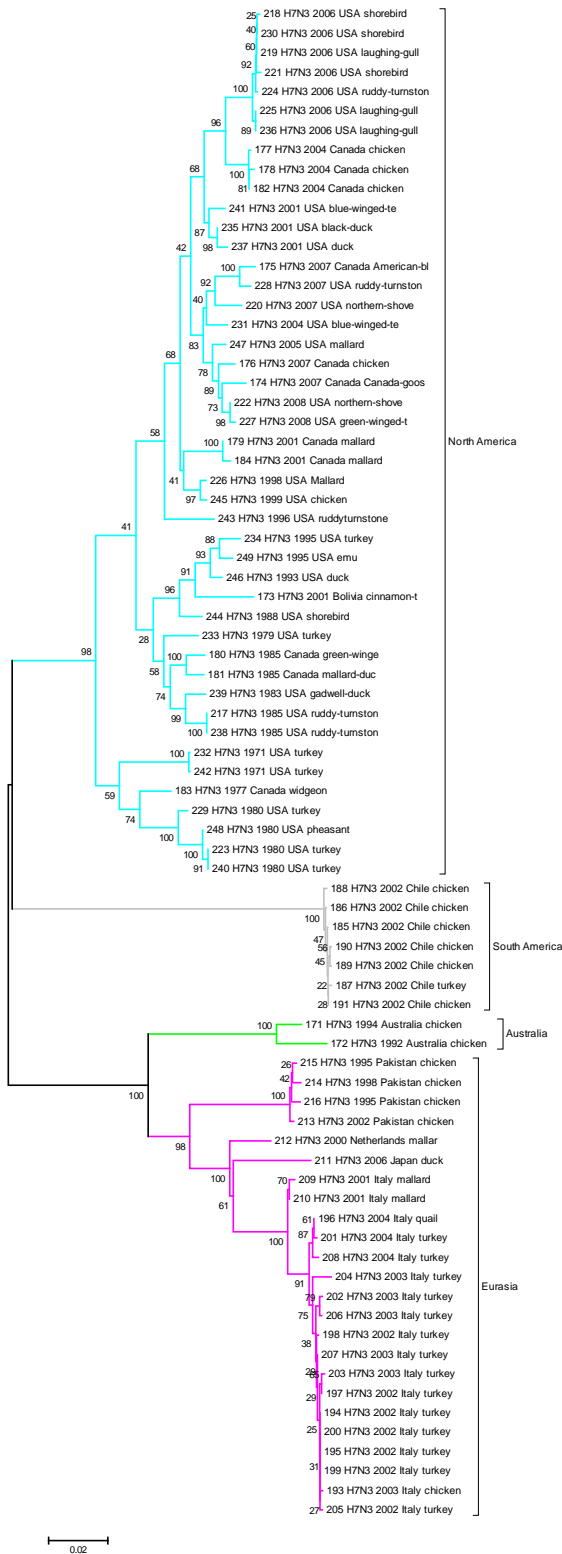

**Suppl. Figure 2: (a) Inferred relationships for 78 subtype H7N3 neuraminidase protein coding sequences.** The tree shows the relationships between the major geographic clades of the subtype H7N3 neuraminidase gene. The evolutionary history was inferred using the Minimum Evolution method. The optimal tree with the sum of branch length = 0.81060971 is shown. The percentage of replicate trees in which the associated taxa clustered together in the bootstrap test (500 replicates) are shown next to the branches. The tree is drawn to scale, with branch lengths in the same units as those of the evolutionary distances used to infer the phylogenetic tree. The evolutionary distances were computed using the Maximum Composite Likelihood method and are in the units of the number of base substitutions per site. The ME tree was searched using the Close-Neighbor-Interchange (CNI) algorithm at a search level of 1. The Neighbor-joining algorithm was used to generate the initial tree. All positions containing gaps and missing data were eliminated from the dataset (Complete deletion option). There were a total of 1247 positions in the final dataset. Phylogenetic analyses were conducted in MEGA4 (29).

**Suppl. Figure 2b: Minimum Evolution Tree: neuraminidase \_H7N7**

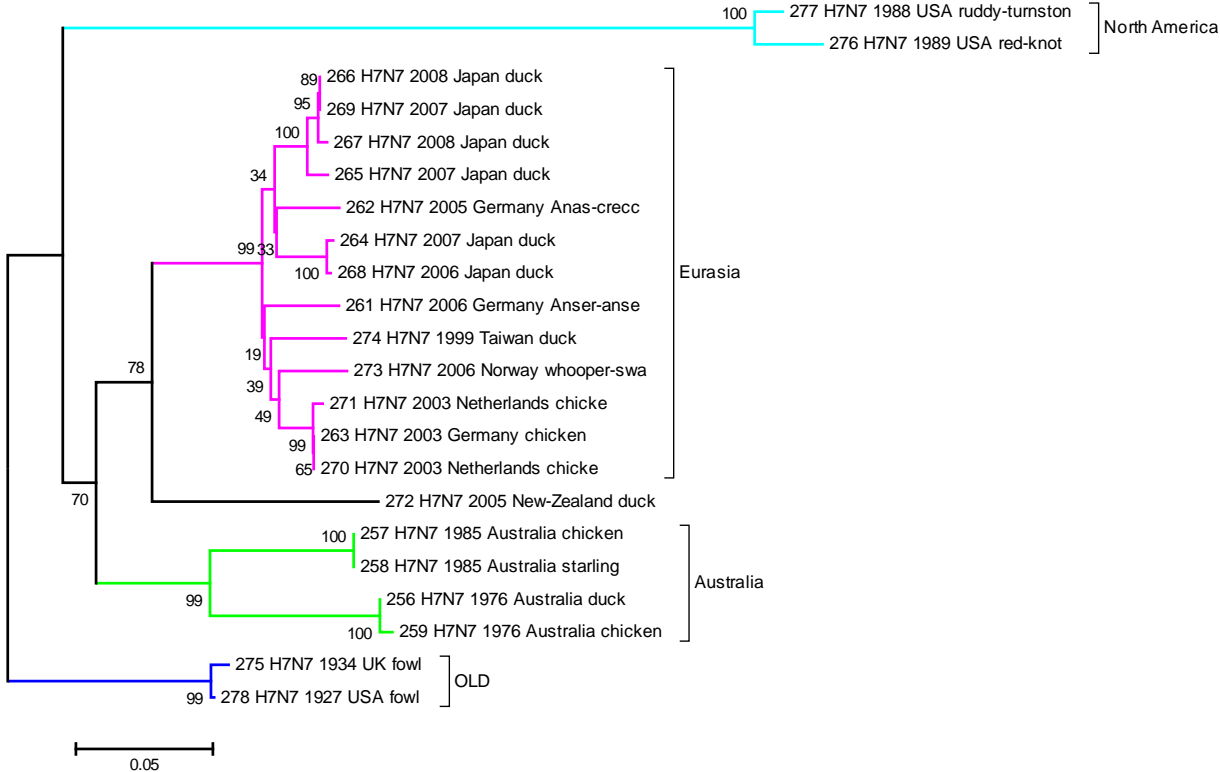

**Suppl. Figure 2: (b) Inferred relationships for 22 subtype H7N7 neuraminidase protein coding sequences.** The tree shows the relationships between the major geographic clades of the H7N7 neuraminidase gene. The evolutionary history was inferred using the Minimum Evolution method. The optimal tree with the sum of branch length = 0.88321959 is shown. The percentage of replicate trees in which the associated taxa clustered together in the bootstrap test (500 replicates) are shown next to the branches. The tree is drawn to scale, with branch lengths in the same units as those of the evolutionary distances used to infer the phylogenetic tree. The evolutionary distances were computed using the Maximum Composite Likelihood method and are in the units of the number of base substitutions per site. The ME tree was searched using the Close-Neighbor-Interchange (CNI) algorithm at a search level of 1. The Neighbor-joining algorithm was used to generate the initial tree. All positions containing gaps and missing data were eliminated from the dataset (Complete deletion option). There were a total of 527 positions in the final dataset. Phylogenetic analyses were conducted in MEGA4 (29).

Suppl. Figure 2c: Minimum Evolution Tree: neuraminidase \_H7N1

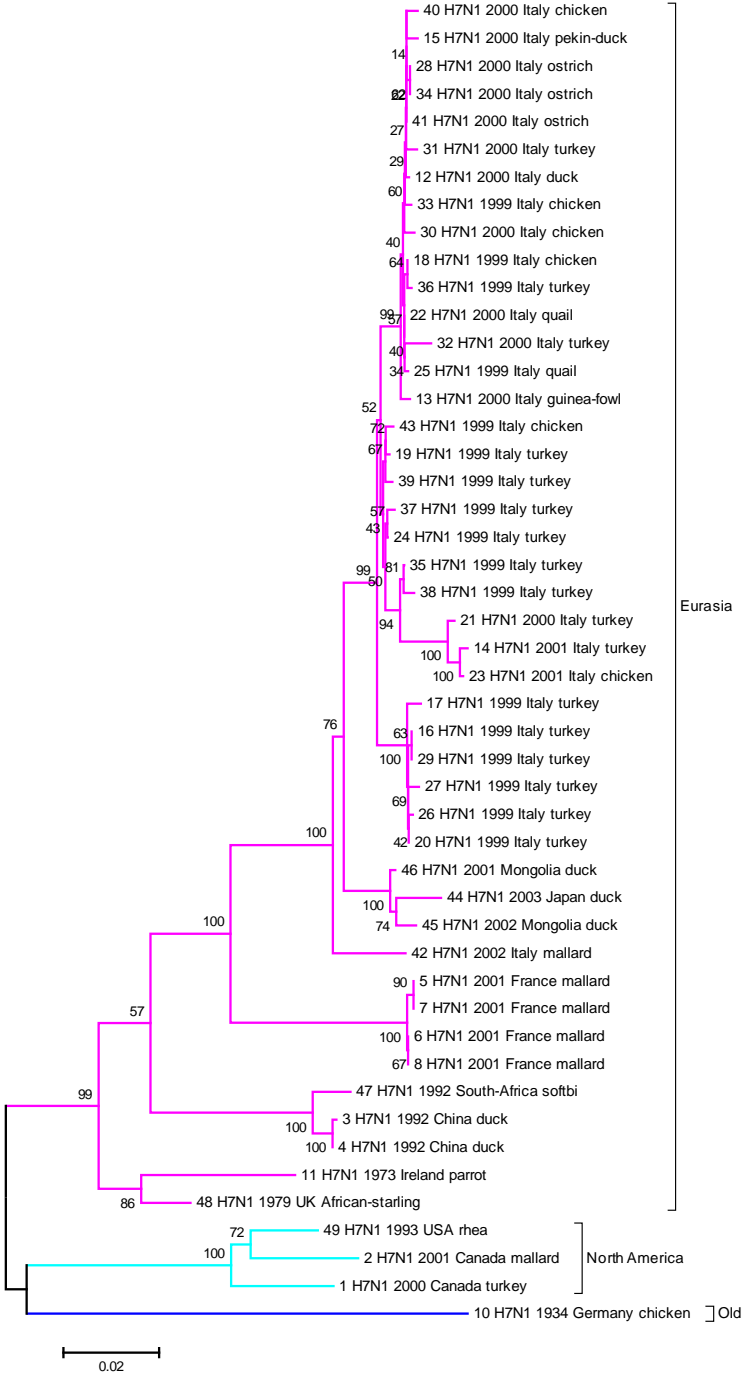

**Suppl. Figure 2: (c) Inferred relationships for 48 subtype H7N1 neuraminidase protein coding sequences.** The tree shows the relationships between the major geographic clades of the H7N1 neuraminidase gene. The evolutionary history was inferred using the Minimum Evolution method. The optimal tree with the sum of branch length = 0.52780887 is shown. The percentage of replicate trees in which the associated taxa clustered together in the bootstrap test (500 replicates) are shown next to the branches. The tree is drawn to scale, with branch lengths in the same units as those of the evolutionary distances used to infer the phylogenetic tree. The evolutionary distances were computed using the Maximum Composite Likelihood method and are in the units of the number of base substitutions per site. The ME tree was searched using the Close-Neighbor-Interchange (CNI) algorithm at a search level of 1. The Neighbor-joining algorithm was used to generate the initial tree. All positions containing gaps and missing data were eliminated from the dataset (Complete deletion option). There were a total of 1271 positions in the final dataset. Phylogenetic analyses were conducted in MEGA4 (29).



**Suppl. Figure 2: (d) Inferred relationships for 120 subtype H7N2 neuraminidase protein coding sequences.** The tree shows the relationships between the major geographic clades of the H7N2 neuraminidase gene. The evolutionary history was inferred using the Minimum Evolution method. The optimal tree with the sum of branch length = 0.64898981 is shown. The percentage of replicate trees in which the associated taxa clustered together in the bootstrap test (500 replicates) are shown next to the branches. The tree is drawn to scale, with branch lengths in the same units as those of the evolutionary distances used to infer the phylogenetic tree. The evolutionary distances were computed using the Maximum Composite Likelihood method and are in the units of the number of base substitutions per site. The ME tree was searched using the Close-Neighbor-Interchange (CNI) algorithm at a search level of 1. The Neighbor-joining algorithm was used to generate the initial tree. All positions containing gaps and missing data were eliminated from the dataset (Complete deletion option). There were a total of 1312 positions in the final dataset. Phylogenetic analyses were conducted in MEGA4 (29).



Suppl. Figure 3: Minimum Evolution Tree subtype N3: neuraminidase

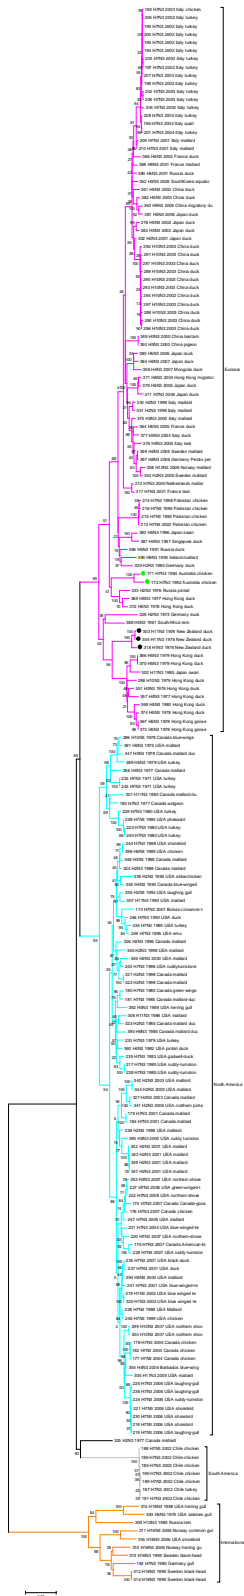

**Suppl. Figure 3: Inferred relationships for 193 subtype N3 neuraminidase protein coding sequences.**

The tree shows the relationships between the major geographic clades of the neuraminidase gene. The evolutionary history was inferred using the Minimum Evolution method. The optimal tree with the sum of branch length = 2.59324955 is shown. The percentage of replicate trees in which the associated taxa clustered together in the bootstrap test (100 replicates) are shown next to the branches. The tree is drawn to scale, with branch lengths in the same units as those of the evolutionary distances used to infer the phylogenetic tree. The evolutionary distances were computed using the Maximum Composite Likelihood method and are in the units of the number of base substitutions per site. The ME tree was searched using the Close-Neighbor-Interchange (CNI) algorithm at a search level of 1. The Neighbor-joining algorithm was used to generate the initial tree. Codon positions included were 1st+2nd+3rd. All positions containing gaps and missing data were eliminated from the dataset (Complete deletion option). There were a total of 1214 positions in the final dataset. Phylogenetic analyses were conducted in MEGA4 (29).

# Suppl. Figure 4: Minimum Evolution Tree: NS1

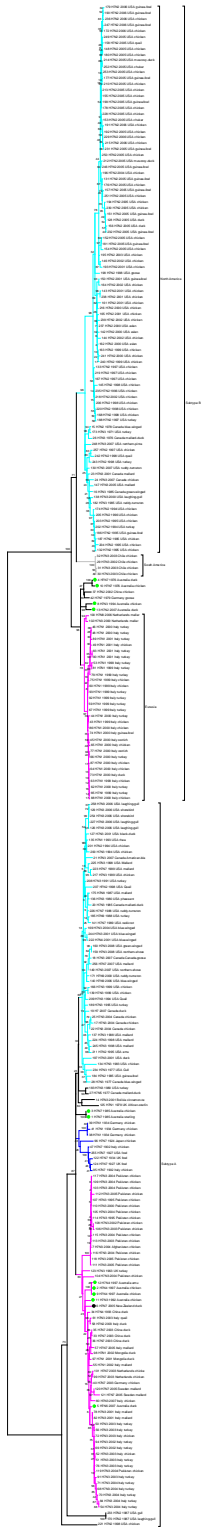

**Suppl. Figure 4: Inferred relationships for 258 subtype H7 NS1 protein coding sequences.**

The tree shows the relationships between the major geographic clades of the NS1 gene. The evolutionary history was inferred using the Minimum Evolution method. The bootstrap consensus tree inferred from 500 replicates is taken to represent the evolutionary history of the taxa analyzed. Branches corresponding to partitions reproduced in less than 56% bootstrap replicates are collapsed. The percentage of replicate trees in which the associated taxa clustered together in the bootstrap test (500 replicates) are shown next to the branches. The tree is drawn to scale, with branch lengths in the same units as those of the evolutionary distances used to infer the phylogenetic tree. The evolutionary distances were computed using the Maximum Composite Likelihood method and are in the units of the number of base substitutions per site. The ME tree was searched using the Close-Neighbor-Interchange (CNI) algorithm at a search level of 1. The Neighbor-joining algorithm was used to generate the initial tree. All positions containing gaps and missing data were eliminated from the dataset (Complete deletion option). There were a total of 621 positions in the final dataset. Phylogenetic analyses were conducted in MEGA4 (29).

# Suppl. Figure 5: Minimum Evolution Tree: PA

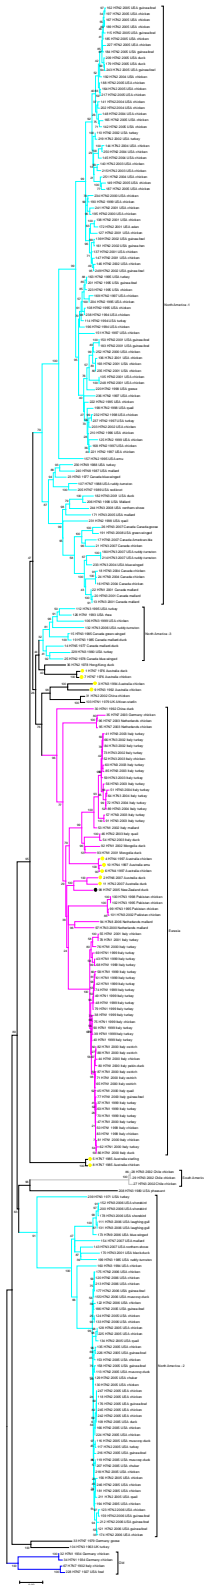

**Suppl. Figure 5: Inferred relationships for 252 subtype H7 PA protein coding sequences.**

The tree shows the relationships between the major geographic clades of the PA gene. The evolutionary history was inferred using the Minimum Evolution method . The optimal tree with the sum of branch length = 1.99895260 is shown. The percentage of replicate trees in which the associated taxa clustered together in the bootstrap test (500 replicates) are shown next to the branches. The tree is drawn to scale, with branch lengths in the same units as those of the evolutionary distances used to infer the phylogenetic tree. The evolutionary distances were computed using the Maximum Composite Likelihood method and are in the units of the number of base substitutions per site. The ME tree was searched using the Close-Neighbor-Interchange (CNI) algorithm at a search level of 1. The Neighbor-joining algorithm was used to generate the initial tree. All positions containing gaps and missing data were eliminated from the dataset (Complete deletion option). There were a total of 2128 positions in the final dataset. Phylogenetic analyses were conducted in MEGA4 (29).

# Suppl. Figure 6: Minimum Evolution Tree: M

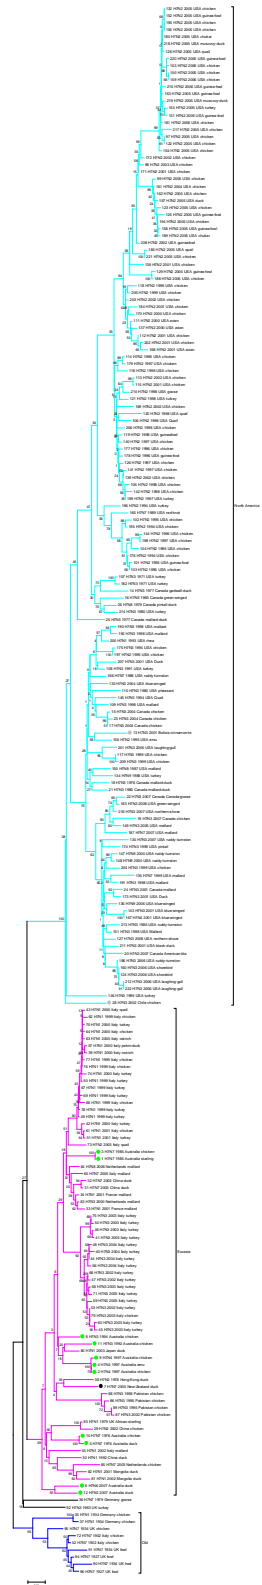

**Suppl. Figure 6: Inferred relationships for 222 subtype H7 Matrix protein coding sequences.**

The tree shows the relationships between the major geographic clades of the matrix gene. The evolutionary history was inferred using the Minimum Evolution method. The optimal tree with the sum of branch length = 1.56339193 is shown. The percentage of replicate trees in which the associated taxa clustered together in the bootstrap test (500 replicates) are shown next to the branches. The tree is drawn to scale, with branch lengths in the same units as those of the evolutionary distances used to infer the phylogenetic tree. The evolutionary distances were computed using the Maximum Composite Likelihood method and are in the units of the number of base substitutions per site. The ME tree was searched using the Close-Neighbor-Interchange (CNI) algorithm at a search level of 1. The Neighbor-joining algorithm was used to generate the initial tree. All positions containing gaps and missing data were eliminated from the dataset (Complete deletion option). There were a total of 751 positions in the final dataset. Phylogenetic analyses were conducted in MEGA4 (29).



Suppl. Figure 7: Minimum Evolution Tree: PB1

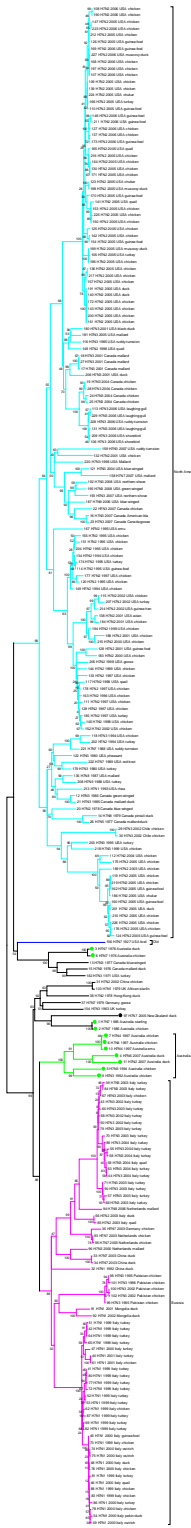

**Suppl. Figure 7: Inferred relationships for 229 subtype H7 PB1 protein coding sequences**

The tree shows the relationships between the major geographic clades of the PB1 gene. The evolutionary history was inferred using the Minimum Evolution method. The optimal tree with the sum of branch length = 1.79522666 is shown. The percentage of replicate trees in which the associated taxa clustered together in the bootstrap test (500 replicates) are shown next to the branches. The tree is drawn to scale, with branch lengths in the same units as those of the evolutionary distances used to infer the phylogenetic tree. The evolutionary distances were computed using the Maximum Composite Likelihood method and are in the units of the number of base substitutions per site. The ME tree was searched using the Close-Neighbor-Interchange (CNI) algorithm at a search level of 1. The Neighbor-joining algorithm was used to generate the initial tree. All positions containing gaps and missing data were eliminated from the dataset (Complete deletion option). There were a total of 2249 positions in the final dataset. Phylogenetic analyses were conducted in MEGA4 (29).

Suppl. Figure 8: Minimum Evolution Tree: PB2

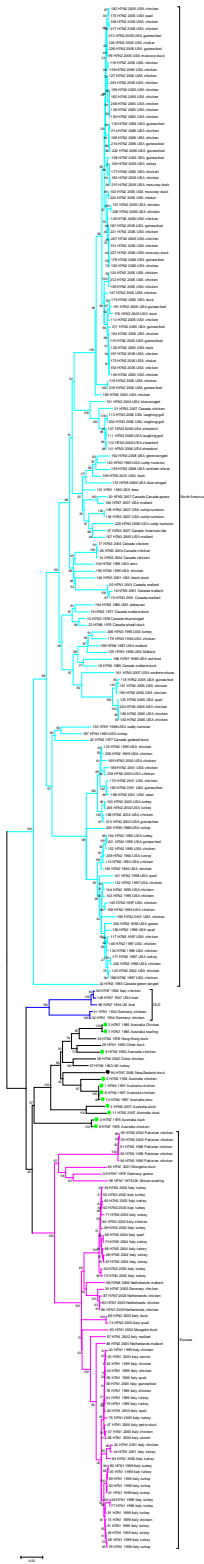

**Suppl. Figure 8: Inferred relationships for 229 subtype H7 PB2 protein coding sequences.**

The tree shows the relationships between the major geographic clades of the PB2 gene. The evolutionary history was inferred using the Minimum Evolution method. The optimal tree with the sum of branch length = 2.11880439 is shown. The percentage of replicate trees in which the associated taxa clustered together in the bootstrap test (500 replicates) are shown next to the branches. The tree is drawn to scale, with branch lengths in the same units as those of the evolutionary distances used to infer the phylogenetic tree. The evolutionary distances were computed using the Maximum Composite Likelihood method and are in the units of the number of base substitutions per site. The ME tree was searched using the Close-Neighbor-Interchange (CNI) algorithm at a search level of 1. The Neighbor-joining algorithm was used to generate the initial tree. All positions containing gaps and missing data were eliminated from the dataset (Complete deletion option). There were a total of 2250 positions in the final dataset. Phylogenetic analyses were conducted in MEGA4 (29).

Suppl. Figure 9: Minimum Evolution Tree: NP

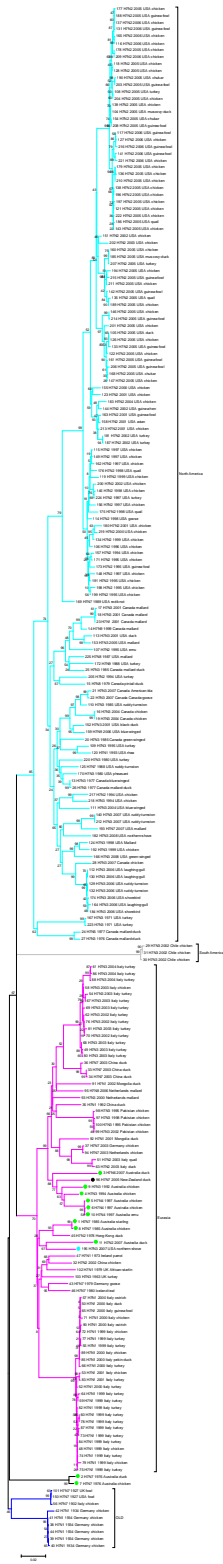

**Suppl. Figure 9: Inferred relationships for 225 subtype H7 NP protein coding sequences.**

The tree shows the relationships between the major geographic clades of the NP gene. The evolutionary history was inferred using the Minimum Evolution method. The optimal tree with the sum of branch length = 1.93601994 is shown. The percentage of replicate trees in which the associated taxa clustered together in the bootstrap test (500 replicates) are shown next to the branches. The tree is drawn to scale, with branch lengths in the same units as those of the evolutionary distances used to infer the phylogenetic tree. The evolutionary distances were computed using the Maximum Composite Likelihood method and are in the units of the number of base substitutions per site. The ME tree was searched using the Close-Neighbor-Interchange (CNI) algorithm at a search level of 1. The Neighbor-joining algorithm was used to generate the initial tree. All positions containing gaps and missing data were eliminated from the dataset (Complete deletion option). There were a total of 1480 positions in the final dataset. Phylogenetic analyses were conducted in MEGA4 (29).
